# Supplementary material for: The First Transcriptomic Atlas of the Adult Lacrimal Gland Reveals Epithelial Complexity and Identifies Novel Progenitor Cells in Mice
Source: Cells. 2023 May 21;12(10):1435. doi: 10.3390/cells12101435 (PMC10216974; doi:10.3390/cells12101435)
Supplement: Supplementary file 1 [file cells-12-01435-s001.zip]

Archive with 7 entries (7 files):
- cells-2380877-supplementary figures.pdf
- Table S1 - Top-25 markers for adult mouse lacrimal gland.xlsx
- Table S2 - Top-25 cluster marlers for the lacrimal gland epithelium.xlsx
- Table S3 - DEG analysis between clusters.xlsx
- Table S4 - DEG in Aldh1a1-pos cells of the Ltf epithelial cluster.xlsx
- Table S5 - Top-25 cluster markers for the P4 lacrimal gland.xlsx
- Table S6 - Analysis of tear components.xlsx
