# Supplementary material for: The First Transcriptomic Atlas of the Adult Lacrimal Gland Reveals Epithelial Complexity and Identifies Novel Progenitor Cells in Mice
Source: Cells. 2023 May 21;12(10):1435. doi: 10.3390/cells12101435 (PMC10216974; doi:10.3390/cells12101435)
Supplement: Supplementary file 1 [file cells-12-01435-s001.zip › Table S1 - Top-25 markers for adult mouse lacrimal gland.xlsx]

## Sheet: Top25 cluster marke
cluster_id	p_val	avg_log2FC	pct.1	pct.2	p_val_adj	gene
Acinar 1	0	2.47315	0.844	0.383	0	Lpo
Acinar 1	0	1.99484	0.8	0.349	0	Hp
Acinar 1	0	1.97644	0.958	0.688	0	Dnase1
Acinar 1	0	1.92104	1	1	0	Scgb2b2
Acinar 1	0	1.83365	0.737	0.343	0	Gm8978
Acinar 1	0	1.81271	1	1	0	Scgb1b2
Acinar 1	0	1.79304	0.998	0.989	0	Scgb2b20
Acinar 1	0	1.77419	1	0.993	0	Scgb1b20
Acinar 1	0	1.77086	0.999	0.984	0	Scgb1b7
Acinar 1	0	1.7486	1	1	0	Scgb2b24
Acinar 1	0	1.7467	0.816	0.604	0	Wfdc12
Acinar 1	0	1.65121	0.765	0.386	0	Lipo1
Acinar 1	0	1.65061	1	0.999	0	Pip
Acinar 1	0	1.62947	0.843	0.657	0	2310057J18Rik
Acinar 1	0	1.60018	0.993	0.973	0	Scgb2b7
Acinar 1	0	1.51056	0.485	0.088	0	Prom2
Acinar 1	0	1.50463	1	1	0	Gm5938
Acinar 1	0	1.4828	1	0.984	0	Gm14135
Acinar 1	0	1.48021	0.571	0.161	0	Qsox1
Acinar 1	0	1.46743	0.993	0.893	0	Sval2
Acinar 1	5.61e-156	1.49453	0.659	0.45	9.97e-152	Scgb2b12
Acinar 1	1.23e-122	2.74988	0.287	0.452	2.19e-118	Bpifa2
Acinar 1	5.98e-94	2.27016	0.277	0.418	1.06e-89	Smr3a
Acinar 1	1.15e-47	3.13102	0.212	0.303	2.04e-43	Amy1
Acinar 1	0.00285457	1.48564	0.403	0.509	1	Obp1b
Acinar 2	0	1.95361	1	0.985	0	Gm14135
Acinar 2	0	1.81601	0.839	0.546	0	Esp16
Acinar 2	0	1.73965	0.999	0.974	0	Scgb2b7
Acinar 2	0	1.69364	0.999	0.99	0	Scgb2b20
Acinar 2	0	1.62145	1	1	0	Scgb2b24
Acinar 2	0	1.60947	0.999	0.985	0	Scgb1b7
Acinar 2	0	1.60197	1	0.901	0	Sval2
Acinar 2	0	1.60105	1	0.988	0	Esp15
Acinar 2	0	1.59251	0.999	0.994	0	Scgb1b20
Acinar 2	0	1.51031	1	0.999	0	Pip
Acinar 2	0	1.51022	1	1	0	Scgb1b2
Acinar 2	0	1.50365	1	1	0	Scgb2b2
Acinar 2	0	1.46931	1	1	0	Gm1553
Acinar 2	0	1.41287	1	0.862	0	Lcn11
Acinar 2	0	1.39149	1	1	0	Gm5938
Acinar 2	0	1.39011	1	0.729	0	Scgb1b24
Acinar 2	0	1.3663	0.999	0.655	0	Gm12888
Acinar 2	0	1.36241	1	1	0	Obp1a
Acinar 2	0	1.35779	0.76	0.245	0	Scgb2b3
Acinar 2	0	1.34781	0.999	0.643	0	9530002B09Rik
Acinar 2	0	1.29335	0.611	0.147	0	Esp24
Acinar 2	0	1.26789	1	0.998	0	Esp6
Acinar 2	2.07e-218	1.28528	0.927	0.614	3.69e-214	Wfdc12
Acinar 2	9.18e-169	1.33607	0.835	0.55	1.63e-164	Scgb1b3
Acinar 2	4.35e-47	1.57634	0.749	0.461	7.73e-43	Scgb2b12
Acinar 3	1.11e-126	1.84463	0.942	0.565	1.97e-122	Scgb1b3
Acinar 3	1.63e-107	1.42817	0.997	0.989	2.89e-103	Esp15
Acinar 3	8.68e-103	1.59726	0.939	0.562	1.54e-98	Esp16
Acinar 3	4.48e-101	1.92303	1	0.947	7.97e-97	Malat1
Acinar 3	2.98e-74	1.24561	0.933	0.633	5.29e-70	Wfdc12
Acinar 3	4.97e-53	1.48043	0.692	0.401	8.83e-49	Gm8978
Acinar 3	1.01e-49	2.30045	0.292	0.079	1.79e-45	Tfrc
Acinar 3	9.44e-43	1.36915	0.689	0.442	1.68e-38	Lipo1
Acinar 3	4.34e-36	2.40888	0.353	0.141	7.71e-32	Gm26917
Acinar 3	1.43e-29	2.32485	0.279	0.105	2.54e-25	Etv1
Acinar 3	7.63e-28	1.80347	0.548	0.372	1.36e-23	Neat1
Acinar 3	3.24e-20	1.94604	0.333	0.18	5.75e-16	Auts2
Acinar 3	2.05e-18	1.70218	0.282	0.143	3.64e-14	Slc27a2
Acinar 3	9.56e-18	2.05914	0.417	0.294	1.7e-13	Luc7l2
Acinar 3	1.39e-15	1.64348	0.266	0.14	2.47e-11	Ly6f
Acinar 3	2.57e-14	1.79268	0.356	0.239	4.57e-10	Nktr
Acinar 3	8.3e-14	2.03044	0.295	0.176	1.48e-09	Tent5a
Acinar 3	4.75e-13	1.20588	0.532	0.46	8.45e-09	Btg2
Acinar 3	1.9e-12	1.98952	0.308	0.201	3.38e-08	Snrnp70
Acinar 3	7.21e-10	1.38581	0.272	0.171	1.28e-05	Tcim
Acinar 3	1.91e-09	2.02408	0.295	0.212	3.4e-05	Fgg
Acinar 3	1.95e-09	1.708	0.385	0.317	3.47e-05	Srsf5
Acinar 3	2.51e-08	1.7373	0.266	0.185	0.000445672	Arglu1
Acinar 3	9.61e-07	1.62446	0.298	0.237	0.0170869	Rsrp1
Acinar 3	0.00746647	1.43952	0.292	0.294	1	Xbp1
Duct	0	3.69871	0.95	0.065	0	Krt14
Duct	0	3.60266	0.807	0.034	0	Krt17
Duct	0	3.34858	0.774	0.022	0	Wfdc2
Duct	0	3.27488	0.633	0.04	0	Crisp1
Duct	0	3.20249	0.542	0.009	0	Ly6d
Duct	0	3.19003	0.809	0.043	0	Krt5
Duct	0	2.8523	0.686	0.052	0	Cbr2
Duct	0	2.81415	0.683	0.033	0	Tfcp2l1
Duct	0	2.70423	0.809	0.427	0	Btg2
Duct	0	2.51704	0.539	0.149	0	Dnajb1
Duct	0	2.5118	0.597	0.016	0	Dapl1
Duct	0	2.44969	0.521	0.025	0	Sfn
Duct	0	2.37144	0.539	0.108	0	Ccn1
Duct	0	2.34064	0.76	0.195	0	Atp1a1
Duct	0	2.31601	0.633	0.051	0	Atp1b1
Duct	0	2.24764	0.509	0.055	0	Cdo1
Duct	0	2.22588	0.646	0.215	0	Phlda1
Duct	0	2.21312	0.662	0.075	0	Meis2
Duct	0	2.20693	0.879	0.306	0	Fxyd3
Duct	0	2.1267	0.509	0.051	0	Smoc2
Duct	0	2.11685	0.451	0.027	0	F3
Duct	0	2.09646	0.941	0.64	0	Jun
Duct	0	2.09348	0.73	0.294	0	Sdc4
Duct	0	2.08699	0.406	0.006	0	Gpha2
Duct	5.54e-219	2.10526	0.64	0.327	9.84e-215	Atf3
Endotheli	0	4.56259	0.78	0.029	0	Flt1
Endothelial	0	4.23169	0.737	0.017	0	Plvap
Endothelial	0	4.12158	0.731	0.023	0	Tm4sf1
Endothelial	0	3.9317	0.744	0.031	0	Ly6c1
Endothelial	0	3.67236	0.658	0.004	0	Emcn
Endothelial	0	3.64446	0.607	0.006	0	Kdr
Endothelial	0	3.44584	0.26	0.005	0	Fabp4
Endothelial	0	3.44504	0.596	0.003	0	Ptprb
Endothelial	0	3.36334	0.602	0.004	0	Egfl7
Endothelial	0	3.24092	0.607	0.008	0	Pecam1
Endothelial	0	3.21704	0.668	0.033	0	Ctla2a
Endothelial	0	3.09108	0.47	0.004	0	Aqp1
Endothelial	0	2.99921	0.538	0.002	0	Cdh5
Endothelial	0	2.99487	0.587	0.048	0	Cav1
Endothelial	0	2.94967	0.882	0.178	0	Igfbp7
Endothelial	0	2.84954	0.48	0.003	0	Cyyr1
Endothelial	0	2.82995	0.515	0.053	0	Iigp1
Endothelial	0	2.82768	0.492	0.005	0	Adgrf5
Endothelial	0	2.81636	0.536	0.028	0	Eng
Endothelial	0	2.80411	0.713	0.219	0	Sptbn1
Endothelial	0	2.79773	0.507	0.004	0	Esam
Endothelial	0	2.74197	0.613	0.161	0	Cxcl12
Endothelial	0	2.72543	0.433	0.002	0	Podxl
Endothelial	0	2.68549	0.432	0.009	0	Scarb1
Endothelial	0	2.68232	0.669	0.226	0	Ier3
Fibroblasts	0	7.10567	0.999	0.16	0	Gsn
Fibroblasts	0	7.05266	0.999	0.058	0	Dcn
Fibroblasts	0	5.65801	0.964	0.015	0	Col3a1
Fibroblasts	0	5.56892	0.927	0.012	0	Apod
Fibroblasts	0	5.40818	0.967	0.013	0	Col1a2
Fibroblasts	0	4.30874	0.819	0.006	0	Col1a1
Fibroblasts	0	4.28542	0.674	0.011	0	Cxcl14
Fibroblasts	0	4.27048	0.674	0.003	0	Crabp1
Fibroblasts	0	4.14354	0.825	0.004	0	Lum
Fibroblasts	0	4.13676	0.861	0.011	0	Serping1
Fibroblasts	0	4.12238	0.576	0.003	0	Mmp3
Fibroblasts	0	3.78604	0.786	0.014	0	Serpinf1
Fibroblasts	0	3.73883	0.741	0.006	0	Dpep1
Fibroblasts	0	3.68373	0.71	0.005	0	Ccl11
Fibroblasts	0	3.53938	0.506	0.023	0	Mgp
Fibroblasts	0	3.53257	0.788	0.067	0	Igfbp4
Fibroblasts	0	3.45635	0.676	0.008	0	Adamts5
Fibroblasts	0	3.44792	0.492	0.021	0	C3
Fibroblasts	0	3.40631	0.934	0.175	0	Sparc
Fibroblasts	0	3.39081	0.725	0.044	0	Bgn
Fibroblasts	0	3.37276	0.697	0.032	0	Lpl
Fibroblasts	0	3.26926	0.62	0.002	0	Clec3b
Fibroblasts	0	3.25884	0.686	0.004	0	Col6a1
Fibroblasts	0	3.1962	0.627	0.003	0	Srpx
Fibroblasts	0	3.19088	0.673	0.003	0	Col6a3
Ltf+ epithelial	0	6.90096	0.683	0.061	0	Ltf
Ltf+ epithelial	0	5.98903	0.985	0.445	0	Wfdc18
Ltf+ epithelial	0	4.78469	0.812	0.098	0	Cyp2f2
Ltf+ epithelial	0	4.48826	0.715	0.019	0	Sftpd
Ltf+ epithelial	0	4.36662	0.445	0.01	0	Dmbt1
Ltf+ epithelial	0	4.36287	0.794	0.133	0	Cryab
Ltf+ epithelial	0	3.88681	0.812	0.237	0	Krt18
Ltf+ epithelial	0	3.73905	0.464	0.053	0	Cyp2a5
Ltf+ epithelial	0	3.67894	0.805	0.149	0	Gsta3
Ltf+ epithelial	0	3.3126	0.787	0.238	0	Krt8
Ltf+ epithelial	0	3.12728	0.376	0.007	0	Fcgbp
Ltf+ epithelial	0	2.87347	0.774	0.192	0	Epcam
Ltf+ epithelial	0	2.85418	0.491	0.035	0	Ccl9
Ltf+ epithelial	0	2.85195	0.538	0.016	0	Pglyrp1
Ltf+ epithelial	0	2.62402	0.63	0.144	0	Tcim
Ltf+ epithelial	0	2.61905	0.882	0.325	0	Fxyd3
Ltf+ epithelial	0	2.39858	0.435	0.011	0	Cxcl17
Ltf+ epithelial	0	2.35647	0.392	0.005	0	F5
Ltf+ epithelial	0	2.27464	0.506	0.078	0	Ces1d
Ltf+ epithelial	1.11e-278	2.40782	0.885	0.589	1.97e-274	Nupr1
Ltf+ epithelial	3.95e-257	2.24561	0.731	0.36	7.01e-253	Taldo1
Ltf+ epithelial	3.99e-250	2.28836	0.725	0.335	7.08e-246	Cyb5a
Ltf+ epithelial	8.69e-105	2.40356	0.915	0.763	1.54e-100	Mup4
Ltf+ epithelial	2.62e-68	4.53952	0.691	0.623	4.65e-64	Car6
Ltf+ epithelial	3.58e-64	2.40748	0.545	0.388	6.36e-60	Bglap3
Lymhpoid	0	3.22488	0.37	0.064	0	Ccl5
Lymhpoid	0	3.02081	0.271	0.004	0	Xcl1
Lymhpoid	0	2.81687	0.32	0.003	0	Nkg7
Lymhpoid	0	2.74713	0.376	0.028	0	Vps37b
Lymhpoid	0	2.39718	0.255	0.008	0	Gata3
Lymhpoid	0	2.33674	0.289	0.004	0	Ms4a4b
Lymhpoid	0	2.25291	0.332	0.006	0	Ltb
Lymhpoid	0	2.22244	0.298	0.002	0	Trbc2
Lymhpoid	0	2.19023	0.337	0.042	0	Cd69
Lymhpoid	0	2.11867	0.319	0.003	0	Ptprcap
Lymhpoid	0	2.11501	0.264	0.019	0	Il7r
Lymhpoid	0	2.07966	0.444	0.095	0	H2-Q7
Lymhpoid	0	2.03667	0.25	0.002	0	Trbc1
Lymhpoid	0	2.0341	0.316	0.01	0	Hcst
Lymhpoid	0	1.98004	0.367	0.047	0	Rac2
Lymhpoid	0	1.95782	0.344	0.052	0	Stk17b
Lymhpoid	1.52e-306	1.9961	0.47	0.116	2.71e-302	Ptprc
Lymhpoid	2.41e-288	1.99892	0.34	0.059	4.28e-284	S100a4
Lymhpoid	1.17e-236	1.98334	0.618	0.284	2.07e-232	Btg1
Lymhpoid	1.2e-225	2.46713	0.471	0.162	2.13e-221	AW112010
Lymhpoid	5.74e-175	1.96424	0.405	0.138	1.02e-170	Tnfaip3
Lymhpoid	1.01e-166	2.14763	0.517	0.246	1.79e-162	Zfp36l2
Lymhpoid	7.5e-123	2.08383	0.286	0.096	1.33e-118	Rora
Lymhpoid	4.41e-83	2.09747	0.356	0.179	7.84e-79	Nr4a1
Lymhpoid	3.71e-30	1.90467	0.265	0.178	6.6e-26	Furin
Macrophages	0	6.281	0.963	0.108	0	Ccl4
Macrophages	0	5.45496	0.91	0.057	0	Ccl3
Macrophages	0	5.36988	0.764	0.041	0	Cxcl2
Macrophages	0	5.32118	0.947	0.017	0	C1qa
Macrophages	0	5.17167	0.946	0.018	0	C1qb
Macrophages	0	4.60546	0.99	0.11	0	Cd74
Macrophages	0	4.49702	0.875	0.008	0	C1qc
Macrophages	0	4.35712	0.967	0.079	0	H2-Eb1
Macrophages	0	4.2815	0.97	0.077	0	H2-Aa
Macrophages	0	4.18061	0.959	0.08	0	H2-Ab1
Macrophages	0	4.17751	0.871	0.036	0	Ctss
Macrophages	0	4.09114	0.78	0.03	0	Tnf
Macrophages	0	3.76828	0.783	0.062	0	Rgs1
Macrophages	0	3.64137	0.961	0.427	0	Apoe
Macrophages	0	3.6341	0.755	0.023	0	Cybb
Macrophages	0	3.61761	0.729	0.007	0	Ms4a7
Macrophages	0	3.54585	0.904	0.065	0	Fcer1g
Macrophages	0	3.46751	0.723	0.064	0	Cxcl10
Macrophages	0	3.25991	0.709	0.025	0	Bcl2a1b
Macrophages	0	3.22876	0.555	0.022	0	Lyz2
Macrophages	0	3.19766	0.663	0.035	0	Ccrl2
Macrophages	0	3.12479	0.699	0.019	0	Aif1
Macrophages	0	3.07434	0.864	0.067	0	Tyrobp
Macrophages	0	3.06314	0.592	0.031	0	Il1b
Macrophages	0	2.99258	0.617	0.024	0	Cd83
Monocytes/Dendritic cells	0	3.40576	0.689	0.061	0	S100a4
Monocytes/Dendritic cells	0	3.08526	0.642	0.074	0	Lsp1
Monocytes/Dendritic cells	0	2.47936	0.858	0.192	0	H2-Ab1
Monocytes/Dendritic cells	0	2.41954	0.883	0.19	0	H2-Aa
Monocytes/Dendritic cells	0	2.34916	0.936	0.22	0	Cd74
Monocytes/Dendritic cells	0	2.28588	0.867	0.192	0	H2-Eb1
Monocytes/Dendritic cells	0	2.12245	0.331	0.012	0	Napsa
Monocytes/Dendritic cells	1.15e-272	2.19244	0.427	0.056	2.04e-268	Alox5ap
Monocytes/Dendritic cells	2.01e-267	2.05723	0.753	0.17	3.58e-263	Tyrobp
Monocytes/Dendritic cells	3e-267	2.31918	0.998	0.838	5.34e-263	Tmsb4x
Monocytes/Dendritic cells	3.58e-259	2.09264	0.795	0.207	6.37e-255	Cd52
Monocytes/Dendritic cells	1.03e-257	2.05701	0.349	0.037	1.83e-253	Traf1
Monocytes/Dendritic cells	2.4e-237	1.93996	0.995	0.828	4.27e-233	Actb
Monocytes/Dendritic cells	1.34e-229	2.59169	0.564	0.13	2.37e-225	Ifi30
Monocytes/Dendritic cells	1.38e-223	2.84999	0.523	0.102	2.45e-219	Il1b
Monocytes/Dendritic cells	4.8e-194	2.47543	0.906	0.481	8.52e-190	Cst3
Monocytes/Dendritic cells	1.08e-185	2.06533	0.44	0.087	1.92e-181	H2-DMa
Monocytes/Dendritic cells	2.13e-184	1.96783	0.504	0.112	3.79e-180	Coro1a
Monocytes/Dendritic cells	1.99e-181	2.35633	0.728	0.291	3.53e-177	Crip1
Monocytes/Dendritic cells	7.6e-172	1.99061	0.765	0.336	1.35e-167	Sh3bgrl3
Monocytes/Dendritic cells	1.38e-157	1.99346	0.342	0.06	2.46e-153	Ms4a6c
Monocytes/Dendritic cells	1.2e-139	1.94618	0.466	0.124	2.14e-135	Rel
Monocytes/Dendritic cells	1.17e-131	1.91793	0.721	0.317	2.07e-127	Tmsb10
Monocytes/Dendritic cells	7.32e-112	2.10837	0.669	0.371	1.3e-107	H2afz
Monocytes/Dendritic cells	9.6e-92	2.5755	0.356	0.095	1.71e-87	Lyz2
Mural	0	5.78312	0.693	0.006	0	Rgs5
Mural	0	3.28512	0.623	0.007	0	Des
Mural	0	3.19574	0.509	0.003	0	Notch3
Mural	0	3.1271	0.5	0.01	0	Mustn1
Mural	0	2.8593	0.518	0.016	0	Gucy1a1
Mural	0	2.64781	0.43	0.009	0	Sncg
Mural	0	2.58946	0.351	0	0	Rgs4
Mural	0	2.54549	0.421	0.007	0	Gucy1b1
Mural	3.93e-269	3.60959	0.658	0.034	6.98e-265	Gm13889
Mural	3.63e-260	4.35603	0.825	0.059	6.46e-256	Tagln
Mural	9.27e-255	4.01554	0.711	0.043	1.65e-250	Myh11
Mural	3.19e-254	4.14257	0.868	0.066	5.67e-250	Acta2
Mural	5.26e-252	2.6994	0.412	0.013	9.35e-248	Ppp1r14a
Mural	8.21e-239	2.85979	0.509	0.023	1.46e-234	Ndufa4l2
Mural	1.54e-176	3.96115	0.798	0.084	2.74e-172	Myl9
Mural	4.99e-164	2.72624	0.509	0.034	8.86e-160	Filip1l
Mural	2.3e-143	3.41104	0.842	0.113	4.09e-139	Tpm2
Mural	6.3e-95	2.86488	0.693	0.113	1.12e-90	Mylk
Mural	1.88e-92	2.86921	0.702	0.118	3.35e-88	Sparcl1
Mural	3.18e-79	3.63026	0.895	0.302	5.66e-75	Crip1
Mural	6e-78	3.68939	0.737	0.175	1.07e-73	Tpm1
Mural	9.13e-76	3.37422	0.798	0.221	1.62e-71	Cald1
Mural	8.45e-57	2.57028	0.316	0.037	1.5e-52	Ifitm1
Mural	4.86e-48	2.57464	0.526	0.121	8.64e-44	Flna
Mural	8.94e-48	2.64962	0.895	0.584	1.59e-43	Myl6
Myoepithelial	0	5.29601	0.968	0.02	0	Acta2
Myoepithelial	0	5.10355	0.958	0.07	0	Tpm2
Myoepithelial	0	4.87534	0.885	0.005	0	Cck
Myoepithelial	0	4.59129	0.885	0.017	0	Tagln
Myoepithelial	0	4.26034	0.872	0.009	0	Igfbp2
Myoepithelial	0	3.98616	0.877	0.044	0	Myl9
Myoepithelial	0	3.76655	0.739	0.008	0	Myh11
Myoepithelial	0	3.71352	0.724	0.003	0	Cnn1
Myoepithelial	0	3.50156	0.811	0.078	0	Mylk
Myoepithelial	0	3.40434	0.843	0.089	0	Igfbp5
Myoepithelial	0	3.36285	0.614	0.028	0	Id4
Myoepithelial	0	3.20795	0.906	0.308	0	Dstn
Myoepithelial	0	3.03698	0.72	0.072	0	Lcn2
Myoepithelial	0	2.93682	0.783	0.137	0	Csrp1
Myoepithelial	0	2.90351	0.518	0.001	0	Pcp4
Myoepithelial	0	2.87941	0.762	0.146	0	Tpm1
Myoepithelial	0	2.84521	0.702	0.076	0	Sfrp1
Myoepithelial	0	2.80608	0.7	0.094	0	Kitl
Myoepithelial	0	2.76274	0.766	0.194	0	Cald1
Myoepithelial	0	2.64499	0.963	0.565	0	Myl6
Myoepithelial	0	2.62219	0.556	0.089	0	Plcb4
Myoepithelial	0	2.45246	0.673	0.091	0	Sparcl1
Myoepithelial	0	2.43861	0.494	0.022	0	Ntrk3
Myoepithelial	0	2.40473	0.524	0.053	0	Postn
Myoepithelial	0	2.39669	0.61	0.096	0	Flna

## Sheet: Top25 conserved markers
		Females					Males 1					Males 2
cluster_id	gene	p_val	avg_log2FC	pct.1	pct.2	p_val_adj	p_val	avg_log2FC	pct.1	pct.2	p_val_adj	p_val	avg_log2FC	pct.1	pct.2	p_val_adj	max_pval	minimump_p_val
Acinar 1	Wfdc12	7.87596e-36	1.63555	0.365	0.201	1.39979e-31	1.18389e-256	1.40099	1	0.979	2.10413e-252	0	1.40944	1	0.919	0	7.87596e-36	0
Acinar 1	Pip	0	2.4937	1	0.999	0	0	1.25289	1	0.999	0	0	1.13278	1	0.999	0	0	0
Acinar 1	Scgb2b2	0	2.25066	1	1	0	0	1.64051	1	1	0	0	1.5999	1	1	0	0	0
Acinar 1	Scgb1b2	0	2.34558	1	1	0	0	1.43471	1	1	0	0	1.47143	1	1	0	0	0
Acinar 1	Scgb1b7	4.09512e-289	2.36226	0.996	0.965	7.27826e-285	0	1.33688	1	1	0	0	1.40562	1	1	0	4.09512e-289	0
Acinar 1	Scgb2b20	2.01039e-283	2.22995	0.995	0.976	3.57306e-279	0	1.38579	1	1	0	0	1.44203	1	1	0	2.01039e-283	0
Acinar 1	Scgb1b20	2.52871e-294	2.28215	0.999	0.986	4.49428e-290	0	1.35549	1	1	0	0	1.42215	1	1	0	2.52871e-294	0
Acinar 1	Scgb2b24	0	2.32621	1	1	0	0	1.35146	1	1	0	0	1.41225	1	1	0	0	0
Acinar 1	Mucl2	0	2.11888	1	1	0	1.42185e-287	0.820833	1	1	2.52705e-283	0	0.871095	1	1	0	1.42185e-287	0
Acinar 1	Gm5938	2.8094e-294	2.17361	1	1	4.99314e-290	5.51992e-269	1.09197	1	1	9.81055e-265	0	1.12246	1	1	0	5.51992e-269	0
Acinar 1	Scgb2b7	2.7973e-248	2.10379	0.975	0.941	4.97164e-244	0	1.15132	1	1	0	7.9743e-299	1.27688	1	1	1.41727e-294	2.7973e-248	0
Acinar 1	Lpo	1.59883e-96	1.8089	0.564	0.332	2.84161e-92	0	2.61716	0.972	0.448	0	5.26807e-280	2.31953	0.945	0.403	9.36294e-276	1.59883e-96	0
Acinar 1	Hp	2.55393e-76	1.80748	0.574	0.398	4.53911e-72	0	2.29406	0.931	0.317	0	3.9829e-268	1.81376	0.857	0.295	7.07881e-264	2.55393e-76	0
Acinar 1	Qsox1	3.85557e-21	0.544416	0.26	0.137	6.85251e-17	0	1.89679	0.78	0.174	0	6.66712e-204	1.53514	0.624	0.189	1.18495e-199	3.85557e-21	0
Acinar 1	Prom2	1.96849e-67	0.61229	0.202	0.045	3.4986e-63	0	1.73041	0.667	0.111	0	2.46122e-202	1.66309	0.542	0.139	4.37432e-198	1.96849e-67	0
Acinar 1	Gm1553	0	2.07901	1	1	0	1.48273e-134	0.474353	1	1	2.63525e-130	1.53587e-192	0.759299	1	1	2.7297e-188	1.48273e-134	0
Acinar 1	Gm14135	3.83353e-305	2.45662	1	0.99	6.81334e-301	1.45145e-179	0.814941	1	0.982	2.57966e-175	9.54505e-195	0.910421	1	0.975	1.69644e-190	1.45145e-179	1.15006e-304
Acinar 1	Esp6	1.14846e-303	2.07103	1	0.997	2.04116e-299	3.97984e-224	0.8055	1	0.999	7.07336e-220	3.1843e-232	0.8009	1	0.997	5.65945e-228	3.97984e-224	3.44539e-303
Acinar 1	Gm14743	4.03333e-301	2.1833	1	1	7.16844e-297	0.49977	0.408181	0.445	0.386	1	5.32157e-14	0.623912	0.505	0.324	9.45803e-10	0.49977	1.21e-300
Acinar 1	Esp15	9.36849e-299	2.18144	0.997	0.983	1.66506e-294	2.22702e-195	0.786923	1	0.995	3.95808e-191	5.32027e-156	0.714838	0.999	0.987	9.45571e-152	5.32027e-156	2.81055e-298
Acinar 1	Obp1a	7.2546e-296	2.15706	1	1	1.28936e-291	3.31588e-254	0.99169	1	1	5.89331e-250	6.0438e-290	1.01906	1	1	1.07416e-285	3.31588e-254	2.17638e-295
Acinar 1	Sval2	2.43821e-290	2.26109	0.989	0.939	4.33343e-286	7.21377e-200	0.988436	0.997	0.887	1.2821e-195	7.16463e-202	1.00326	0.992	0.816	1.27337e-197	7.21377e-200	7.31462e-290
Acinar 1	Gm8978	2.04926e-11	1.12638	0.175	0.107	3.64216e-07	2.1033e-286	1.81744	0.963	0.561	3.7382e-282	5.6223e-210	1.41628	0.968	0.528	9.99251e-206	2.04926e-11	6.3099e-286
Acinar 1	Dnase1	2.79411e-266	2.66635	0.912	0.793	4.96598e-262	4.23928e-241	1.73588	0.967	0.651	7.53448e-237	2.45413e-212	1.39564	0.985	0.54	4.36173e-208	2.45413e-212	8.38234e-266
Acinar 1	Lipo1	1.88508e-21	1.3493	0.285	0.175	3.35036e-17	3.15044e-263	1.56836	0.956	0.583	5.59927e-259	8.51934e-201	1.24812	0.964	0.549	1.51414e-196	1.88508e-21	9.45131e-263
Acinar 2	Gm14135	3.49353e-161	2.57222	1	0.991	6.20905e-157	1.83965e-203	1.73215	1	0.984	3.26961e-199	3.95335e-255	1.59792	1	0.977	7.02628e-251	3.49353e-161	1.186e-254
Acinar 2	Scgb2b7	8.08773e-31	1.96609	0.997	0.943	1.43743e-26	2.75391e-194	1.19388	1	1	4.89452e-190	6.88516e-239	1.37894	1	1	1.2237e-234	8.08773e-31	2.06555e-238
Acinar 2	Gm1553	3.13347e-150	1.97423	1	1	5.56912e-146	1.7633e-226	1.12498	1	1	3.13391e-222	2.04693e-217	1.00884	1	1	3.638e-213	3.13347e-150	5.2899e-226
Acinar 2	Esp16	2.39253e-69	0.274093	0.292	0.044	4.25225e-65	2.08331e-207	1.55192	1	0.971	3.70267e-203	3.30914e-213	1.21752	1	0.947	5.88134e-209	2.39253e-69	9.92743e-213
Acinar 2	Scgb2b24	2.42521e-143	2.06937	1	1	4.31032e-139	1.62164e-169	1.2064	1	1	2.88214e-165	1.52732e-212	1.3107	1	1	2.71451e-208	2.42521e-143	4.58197e-212
Acinar 2	Sval2	8.25295e-152	2.21968	1	0.942	1.4668e-147	1.0719e-165	1.29043	1	0.898	1.90509e-161	6.43913e-212	1.35276	1	0.834	1.14443e-207	8.25295e-152	1.93174e-211
Acinar 2	Esp15	6.36709e-117	1.84081	1	0.984	1.13162e-112	1.74207e-206	1.54386	1	0.995	3.09618e-202	4.49363e-199	1.15449	1	0.988	7.98652e-195	6.36709e-117	5.2262e-206
Acinar 2	Scgb2b20	2.30952e-45	1.96275	0.997	0.977	4.10471e-41	1.3001e-158	1.14489	1	1	2.31067e-154	2.21032e-201	1.3397	1	1	3.9284e-197	2.30952e-45	6.63097e-201
Acinar 2	Scgb1b20	1.24736e-56	2.01396	0.997	0.987	2.21693e-52	3.58452e-138	1.02773	1	1	6.37077e-134	5.33238e-188	1.23216	1	1	9.47725e-184	1.24736e-56	1.59972e-187
Acinar 2	Scgb1b7	8.81076e-63	2.14819	0.997	0.967	1.56594e-58	1.25617e-142	1.04594	1	1	2.23258e-138	1.19069e-185	1.20975	1	1	2.11622e-181	8.81076e-63	3.57208e-185
Acinar 2	Pip	2.11405e-148	2.13943	1	0.999	3.75729e-144	8.72258e-173	1.25141	1	1	1.55026e-168	8.58344e-182	1.04762	1	0.999	1.52554e-177	2.11405e-148	2.57503e-181
Acinar 2	Scgb1b2	5.21936e-143	2.04532	1	1	9.27637e-139	4.77605e-140	1.07401	1	1	8.48847e-136	2.75427e-179	1.19322	1	1	4.89517e-175	4.77605e-140	8.26282e-179
Acinar 2	Scgb1b24	3.33226e-136	1.66341	1	0.656	5.92242e-132	2.46824e-133	0.989497	1	0.826	4.3868e-129	1.31144e-174	1.17575	1	0.748	2.33083e-170	2.46824e-133	3.93433e-174
Acinar 2	Obp1a	5.03007e-155	2.09113	1	1	8.93995e-151	1.80844e-142	1.05429	1	1	3.21414e-138	5.33617e-170	0.934673	1	1	9.48398e-166	1.80844e-142	1.60085e-169
Acinar 2	Scgb2b2	8.06971e-144	1.99253	1	1	1.43423e-139	2.41183e-120	1.0453	1	1	4.28655e-116	6.83575e-165	1.19481	1	1	1.21492e-160	2.41183e-120	2.05073e-164
Acinar 2	Esp6	3.17874e-147	1.94092	1	0.997	5.64957e-143	8.31564e-164	0.953533	1	0.999	1.47794e-159	1.7859e-160	0.823514	1	0.998	3.17408e-156	3.17874e-147	2.49469e-163
Acinar 2	Gm5938	1.21283e-158	2.1737	1	1	2.15557e-154	1.19598e-138	1.10906	1	1	2.12561e-134	5.37341e-157	0.947672	1	1	9.55015e-153	1.19598e-138	3.6385e-158
Acinar 2	9530002B09Rik	1.7239e-149	1.39757	0.997	0.461	3.06388e-145	1.54922e-157	1.14001	1	0.842	2.75342e-153	7.97407e-135	0.918687	1	0.738	1.41723e-130	7.97407e-135	4.64765e-157
Acinar 2	Agr2	1.85263e-153	1.20966	1	0.345	3.29268e-149	1.83012e-41	0.478617	1	0.492	3.25268e-37	3.35289e-57	0.446741	1	0.442	5.9591e-53	1.83012e-41	5.55789e-153
Acinar 2	Gm12888	1.04342e-135	1.70911	0.997	0.592	1.85447e-131	1.86944e-150	1.17905	1	0.715	3.32256e-146	3.36799e-140	0.914319	1	0.701	5.98593e-136	1.04342e-135	5.60833e-150
Acinar 2	Lcn11	6.66011e-149	2.06917	1	0.819	1.1837e-144	1.1999e-124	1.0765	1	0.931	2.13258e-120	1.37484e-142	0.993103	1	0.861	2.4435e-138	1.1999e-124	1.99803e-148
Acinar 2	Gm14743	5.05683e-143	2.23296	1	1	8.9875e-139	0.120828	0.773561	0.598	0.377	1	0.0287921	0.308534	0.523	0.341	1	0.120828	1.51705e-142
Acinar 2	Mucl2	2.78624e-141	1.87085	1	1	4.95199e-137	3.12855e-120	0.77868	1	1	5.56038e-116	5.22287e-107	0.617688	1	1	9.2826e-103	5.22287e-107	8.35873e-141
Acinar 2	Scgb2a2	1.24442e-103	1.5039	0.962	0.407	2.21172e-99	1.92829e-119	0.712068	0.783	0.187	3.42715e-115	4.63583e-90	0.933914	0.918	0.341	8.23927e-86	4.63583e-90	5.78487e-119
Acinar 2	Esp18	6.27272e-117	1.36524	1	0.946	1.11485e-112	9.61567e-106	0.691561	1	0.898	1.70899e-101	2.99271e-75	0.437987	1	0.863	5.31895e-71	2.99271e-75	1.88182e-116
Acinar 3	Malat1	3.07627e-10	2.60112	1	0.955	5.46745e-06	1.00215e-45	1.33979	1	0.969	1.78112e-41	1.95493e-82	3.1531	1	0.912	3.4745e-78	3.07627e-10	5.8648e-82
Acinar 3	Gm42418	2.30971e-07	1.2087	0.947	0.987	0.00410504	5.51431e-30	0.785171	1	0.945	9.80059e-26	8.44259e-70	2.28534	1	0.957	1.5005e-65	2.30971e-07	2.53278e-69
Acinar 3	Gm26917	0.494709	0.837762	0.211	0.178	1	2.0433e-11	1.55629	0.272	0.119	3.63156e-07	1.11261e-47	3.37533	0.473	0.107	1.97745e-43	0.494709	3.33784e-47
Acinar 3	Luc7l2	0.628044	0.505652	0.263	0.42	1	1.63952e-06	1.22666	0.327	0.214	0.0291391	6.96657e-41	3.16229	0.55	0.175	1.23817e-36	0.628044	2.08997e-40
Acinar 3	Ogt	0.876805	0.611406	0.158	0.203	1	1.70008e-06	1.27079	0.191	0.093	0.0302155	2.03204e-27	2.83831	0.321	0.077	3.61154e-23	0.876805	6.09612e-27
Acinar 3	Snrnp70	0.416874	0.499367	0.158	0.287	1	2.79078e-08	1.25424	0.265	0.137	0.000496005	3.0363e-23	2.94177	0.382	0.127	5.39642e-19	0.416874	9.1089e-23
Acinar 3	Tnrc6a	0.878254	0.903645	0.158	0.17	1	5.21423e-13	1.23459	0.241	0.088	9.26726e-09	3.2439e-21	2.68568	0.267	0.067	5.76539e-17	0.878254	9.73171e-21
Acinar 3	Neat1	0.000142962	2.26047	0.632	0.409	1	4.06142e-09	0.962647	0.519	0.367	7.21837e-05	3.34667e-21	2.37128	0.573	0.317	5.94804e-17	0.000142962	1.004e-20
Acinar 3	Nktr	0.547144	0.443325	0.211	0.335	1	5.48896e-11	1.3294	0.34	0.177	9.75553e-07	9.52464e-21	2.63374	0.397	0.15	1.69281e-16	0.547144	2.85739e-20
Acinar 3	Kcnq1ot1	0.172997	1.98574	0.316	0.249	1	4.35667e-06	0.887473	0.191	0.093	0.0774312	1.73461e-19	2.59509	0.29	0.084	3.08292e-15	0.172997	5.20382e-19
Acinar 3	Ccnt2	0.700011	0.591267	0.105	0.089	1	1.82195e-09	1.02004	0.142	0.044	3.23815e-05	1.95706e-19	2.17908	0.198	0.04	3.47828e-15	0.700011	5.87118e-19
Acinar 3	Zc3h7a	0.679142	0.385724	0.105	0.155	1	6.7756e-06	0.973712	0.16	0.073	0.120423	6.78336e-19	2.59611	0.252	0.066	1.20561e-14	0.679142	2.03501e-18
Acinar 3	Auts2	0.0766118	1.4464	0.316	0.211	1	2.26984e-09	1.28507	0.315	0.171	4.03419e-05	3.19011e-17	2.64275	0.359	0.141	5.66979e-13	0.0766118	9.57034e-17
Acinar 3	Rsrp1	0.227884	0.302183	0.158	0.338	1	8.29637e-06	1.1037	0.284	0.178	0.147451	7.26164e-15	2.55912	0.336	0.137	1.29061e-10	0.227884	2.17849e-14
Acinar 3	Srsf5	0.840947	0.450037	0.316	0.458	1	7.23712e-11	1.18187	0.383	0.212	1.28625e-06	5.10063e-14	2.68964	0.397	0.2	9.06534e-10	0.840947	1.53019e-13
Acinar 3	AY036118	5.96906e-06	1.18957	0.895	0.69	0.106088	4.93593e-13	0.815504	0.556	0.327	8.77262e-09	3.77506e-13	1.86655	0.458	0.263	6.70941e-09	5.96906e-06	1.13252e-12
Acinar 3	AC149090.1	0.94549	0.46873	0.105	0.122	1	8.05262e-13	0.991937	0.16	0.043	1.43119e-08	4.24785e-13	1.93565	0.168	0.041	7.5497e-09	0.94549	1.27435e-12
Acinar 3	Tent5a	0.187349	0.940028	0.053	0.179	1	9.56925e-06	1.22854	0.272	0.175	0.170074	5.21027e-13	2.85701	0.359	0.173	9.26022e-09	0.187349	1.56308e-12
Acinar 3	Arglu1	0.241082	0.426724	0.105	0.248	1	5.27233e-07	1.1824	0.265	0.151	0.00937051	3.90574e-12	2.5549	0.29	0.12	6.94166e-08	0.241082	1.17172e-11
Acinar 3	Ddx17	0.894146	0.51479	0.211	0.276	1	0.000250849	0.807002	0.191	0.111	1	1.13738e-10	2.24979	0.26	0.106	2.02146e-06	0.894146	3.41213e-10
Acinar 3	Btg2	2.7155e-08	2.35585	0.895	0.57	0.000482627	4.59753e-08	0.884713	0.519	0.395	0.000817119	1.48144e-10	1.98347	0.496	0.35	2.63297e-06	4.59753e-08	4.44432e-10
Acinar 3	Meis1	0.0151929	2.3582	0.316	0.16	1	0.000549677	0.882424	0.173	0.102	1	7.58402e-10	2.36363	0.237	0.095	1.34791e-05	0.0151929	2.27521e-09
Acinar 3	Fus	0.865677	0.53507	0.316	0.442	1	0.233063	0.283505	0.185	0.157	1	5.51062e-09	1.8902	0.282	0.135	9.79403e-05	0.865677	1.65319e-08
Acinar 3	Hspa1b	0.00324287	1.16934	0.737	0.6	1	0.0048159	0.574505	0.352	0.279	1	5.55299e-09	1.81404	0.405	0.251	9.86933e-05	0.0048159	1.6659e-08
Acinar 3	Clcn3	0.851613	0.659353	0.105	0.103	1	0.0306507	0.770621	0.148	0.107	1	8.92583e-08	2.22937	0.206	0.087	0.00158639	0.851613	2.67775e-07
Duct	Wfdc2	0	3.31893	0.927	0.031	0	0	3.22752	0.515	0.014	0	0	3.32972	0.547	0.018	0	0	0
Duct	Krt14	0	3.71199	0.988	0.075	0	0	3.72218	0.914	0.063	0	0	3.74238	0.86	0.052	0	0	0
Duct	Krt17	0	3.51117	0.917	0.05	0	0	3.62639	0.653	0.025	0	0	3.71548	0.605	0.021	0	0	0
Duct	Crisp1	0	3.12289	0.744	0.092	0	0	3.3382	0.479	0.002	0	0	3.24919	0.426	0.002	0	0	0
Duct	Krt5	0	3.23628	0.968	0.063	0	3.88717e-299	2.91792	0.564	0.03	6.90867e-295	7.48979e-272	2.89106	0.543	0.027	1.33116e-267	7.48979e-272	0
Duct	Ly6d	0	3.24643	0.633	0.014	0	0	3.21358	0.452	0.004	0	7.67844e-247	2.83016	0.329	0.005	1.36469e-242	7.67844e-247	0
Duct	Dapl1	0	2.56536	0.768	0.031	0	3.61755e-260	2.23107	0.34	0.006	6.42948e-256	3.69593e-221	2.361	0.306	0.005	6.56878e-217	3.69593e-221	0
Duct	Smoc2	0	1.83725	0.624	0.11	0	7.91035e-242	2.32456	0.36	0.01	1.40591e-237	4.60813e-180	2.21884	0.287	0.008	8.19002e-176	4.60813e-180	0
Duct	Sfn	0	2.36047	0.599	0.027	0	1.37066e-197	2.67135	0.409	0.026	2.43607e-193	5.33547e-168	2.56628	0.38	0.023	9.48272e-164	5.33547e-168	0
Duct	Gpha2	0	2.16888	0.531	0.013	0	7.18444e-205	2.03583	0.231	0.002	1.27689e-200	8.41674e-150	1.63725	0.174	0.001	1.49591e-145	8.41674e-150	0
Duct	Tfcp2l1	0	3.09894	0.888	0.036	0	4.41335e-137	2.10911	0.373	0.036	7.84385e-133	3.30646e-130	2.18412	0.333	0.024	5.87657e-126	3.30646e-130	0
Duct	Tacstd2	0	2.02242	0.501	0.012	0	3.87393e-118	1.57975	0.178	0.005	6.88513e-114	9.41784e-116	1.68918	0.186	0.005	1.67383e-111	9.41784e-116	0
Duct	Cbr2	0	3.14689	0.873	0.065	0	3.1524e-128	2.08391	0.399	0.045	5.60277e-124	2.07899e-113	2.22947	0.376	0.039	3.69499e-109	2.07899e-113	0
Duct	Rbp1	0	1.69237	0.865	0.212	0	1.08807e-108	1.99738	0.469	0.077	1.93383e-104	2.64663e-101	1.92156	0.391	0.048	4.70385e-97	2.64663e-101	0
Duct	Krt15	0	1.32733	0.29	0.007	0	8.85996e-97	1.39926	0.122	0.002	1.57468e-92	3.92632e-82	1.18101	0.105	0.001	6.97825e-78	3.92632e-82	0
Duct	F3	0	2.26697	0.624	0.055	0	1.58016e-110	1.6137	0.201	0.009	2.80841e-106	6.11508e-79	1.48923	0.143	0.005	1.08683e-74	6.11508e-79	0
Duct	Meis2	0	2.30641	0.858	0.104	0	3.8372e-88	1.98259	0.373	0.061	6.81986e-84	3.79081e-72	1.8078	0.318	0.046	6.7374e-68	3.79081e-72	0
Duct	Cp	0	1.87196	0.797	0.183	0	4.73818e-64	1.6737	0.356	0.073	8.42117e-60	1.71984e-65	1.75802	0.291	0.041	3.05667e-61	4.73818e-64	0
Duct	Trim29	0	1.89069	0.682	0.049	0	4.39786e-74	1.50656	0.257	0.031	7.81632e-70	6.80734e-65	1.56905	0.221	0.023	1.20987e-60	6.80734e-65	0
Duct	Ccdc3	0	1.4048	0.416	0.014	0	2.28537e-59	1.12892	0.116	0.006	4.06179e-55	8.71397e-62	1.24492	0.128	0.006	1.54873e-57	2.28537e-59	0
Duct	Col17a1	0	2.15389	0.74	0.045	0	7.04117e-72	1.3171	0.201	0.019	1.25143e-67	2.78265e-57	1.32374	0.151	0.011	4.9456e-53	2.78265e-57	0
Duct	Atp1b1	0	2.60889	0.846	0.061	0	3.23135e-79	1.73164	0.327	0.05	5.74308e-75	5.76407e-57	1.71658	0.252	0.036	1.02445e-52	5.76407e-57	0
Duct	Mast4	0	1.81308	0.727	0.123	0	1.27634e-63	1.62789	0.297	0.053	2.26844e-59	9.51974e-57	1.75372	0.267	0.042	1.69194e-52	9.51974e-57	0
Duct	Lcn2	0	1.73345	0.537	0.064	0	6.02397e-54	1.55479	0.363	0.088	1.07064e-49	8.6553e-54	1.79545	0.333	0.067	1.53831e-49	8.6553e-54	0
Duct	Car12	0	2.00833	0.625	0.03	0	6.28311e-43	1.22728	0.162	0.022	1.1167e-38	1.06409e-50	1.42682	0.167	0.017	1.8912e-46	6.28311e-43	0
Endotheli	Tm4sf1	0	4.24047	0.828	0.036	0	0	3.69821	0.617	0.015	0	0	4.26353	0.614	0.014	0	0	0
Endothelial	Emcn	0	4.02868	0.831	0.006	0	0	3.13428	0.482	0.002	0	0	3.04465	0.413	0.003	0	0	0
Endothelial	Kdr	0	4.0124	0.77	0.011	0	0	3.15137	0.442	0.002	0	0	2.8981	0.38	0.003	0	0	0
Endothelial	Igfbp7	0	2.34075	0.881	0.265	0	0	3.52657	0.911	0.145	0	0	3.65686	0.848	0.084	0	0	0
Endothelial	Flt1	0	4.84178	0.904	0.054	0	0	4.26712	0.701	0.011	0	0	3.7642	0.55	0.01	0	0	0
Endothelial	Aqp1	0	3.09805	0.538	0.006	0	0	3.10439	0.386	0.001	0	0	3.06092	0.392	0.003	0	0	0
Endothelial	Plvap	0	4.13886	0.762	0.029	0	0	4.40754	0.766	0.009	0	0	4.24049	0.638	0.007	0	0	0
Endothelial	Pecam1	0	3.31296	0.747	0.015	0	0	3.18904	0.48	0.003	0	0	3.0663	0.392	0.002	0	0	0
Endothelial	Ctla2a	0	2.99402	0.736	0.054	0	0	3.57271	0.632	0.014	0	0	3.24353	0.532	0.023	0	0	0
Endothelial	Ly6c1	0	3.80214	0.804	0.045	0	0	4.13493	0.718	0.023	0	0	3.96285	0.614	0.018	0	0	0
Endothelial	Egfl7	0	3.50533	0.735	0.007	0	0	3.40937	0.523	0.003	0	8.93319e-296	2.83904	0.347	0.002	1.5877e-291	8.93319e-296	0
Endothelial	Ptprb	0	3.80608	0.774	0.005	0	0	2.95606	0.426	0.001	0	2.21942e-286	2.72014	0.331	0.002	3.94458e-282	2.21942e-286	0
Endothelial	Esam	0	2.93824	0.652	0.006	0	0	2.68425	0.358	0.003	0	4.83601e-271	2.5245	0.307	0.001	8.59503e-267	4.83601e-271	0
Endothelial	Cdh5	0	3.28577	0.715	0.005	0	0	2.7084	0.376	0.001	0	6.22658e-243	2.36363	0.267	0	1.10665e-238	6.22658e-243	0
Endothelial	Eng	0	2.90754	0.662	0.049	0	1.90932e-267	2.65112	0.401	0.015	3.39344e-263	2.3563e-241	2.70174	0.365	0.011	4.18786e-237	2.3563e-241	0
Endothelial	Adgrl4	0	2.63409	0.536	0.004	0	3.79514e-248	2.18214	0.261	0	6.7451e-244	9.93029e-226	2.34687	0.252	0.001	1.76491e-221	9.93029e-226	0
Endothelial	Grrp1	0	2.11842	0.443	0.001	0	4.31899e-238	2.19443	0.254	0.001	7.67613e-234	4.51755e-220	2.15739	0.243	0	8.02905e-216	4.51755e-220	0
Endothelial	Iigp1	0	2.66039	0.586	0.09	0	2.30312e-242	2.97051	0.439	0.027	4.09334e-238	9.33402e-214	2.97289	0.422	0.024	1.65894e-209	9.33402e-214	0
Endothelial	Scarb1	0	2.74653	0.52	0.016	0	0	2.72027	0.373	0.004	0	1.08354e-207	2.45858	0.271	0.004	1.92578e-203	1.08354e-207	0
Endothelial	Cyyr1	0	3.15954	0.653	0.006	0	4.69286e-301	2.47416	0.31	0	8.34062e-297	5.78344e-203	2.21209	0.231	0.001	1.02789e-198	5.78344e-203	0
Endothelial	Abcg2	0	2.57949	0.572	0.031	0	2.07839e-293	2.62436	0.348	0.004	3.69392e-289	3.54684e-197	2.431	0.271	0.005	6.30381e-193	3.54684e-197	0
Endothelial	Mmrn2	0	2.41364	0.485	0.002	0	3.86458e-253	2.16534	0.266	0	6.86851e-249	1.75689e-194	2.03269	0.216	0	3.12252e-190	1.75689e-194	0
Endothelial	Rasip1	0	1.95827	0.416	0.004	0	3.20621e-166	1.68771	0.18	0.001	5.69839e-162	2.67286e-180	2.02671	0.21	0.001	4.75048e-176	3.20621e-166	0
Endothelial	Rbp7	0	2.61222	0.409	0.002	0	0	3.00108	0.332	0.001	0	1.53852e-174	2.26911	0.198	0.001	2.73441e-170	1.53852e-174	0
Endothelial	Adgrf5	0	3.16829	0.674	0.008	0	4.0078e-266	2.37749	0.307	0.003	7.12306e-262	2.57564e-174	2.21211	0.237	0.004	4.57768e-170	2.57564e-174	0
Fibroblasts	Col3a1	0	5.55902	0.988	0.02	0	0	5.99347	0.959	0.015	0	0	5.50104	0.887	0.008	0	0	0
Fibroblasts	Col5a2	0	2.82403	0.705	0.011	0	0	2.96476	0.525	0.007	0	0	2.71411	0.384	0.003	0	0	0
Fibroblasts	Col6a3	0	3.20691	0.794	0.005	0	0	3.23974	0.554	0.001	0	0	3.04566	0.434	0.001	0	0	0
Fibroblasts	Gsn	0	7.35747	0.999	0.268	0	0	6.7876	0.997	0.1	0	0	6.6863	0.998	0.072	0	0	0
Fibroblasts	Cd302	0	2.89871	0.746	0.036	0	0	2.79897	0.453	0.011	0	0	2.88903	0.398	0.006	0	0	0
Fibroblasts	Serping1	0	4.00149	0.911	0.018	0	0	4.29525	0.811	0.007	0	0	4.32747	0.763	0.006	0	0	0
Fibroblasts	Penk	0	2.09891	0.41	0.003	0	0	3.78123	0.599	0.004	0	0	3.06918	0.402	0.004	0	0	0
Fibroblasts	Plpp3	0	1.91484	0.912	0.295	0	0	2.73551	0.77	0.116	0	0	3.10107	0.743	0.08	0	0	0
Fibroblasts	Col1a2	0	5.32799	0.985	0.019	0	0	5.60671	0.955	0.013	0	0	5.32569	0.926	0.005	0	0	0
Fibroblasts	Rarres2	0	3.14926	0.751	0.011	0	0	2.94848	0.499	0.005	0	0	2.79182	0.407	0.003	0	0	0
Fibroblasts	C1s1	0	3.32657	0.83	0.01	0	0	2.82593	0.463	0.003	0	0	2.85918	0.409	0.005	0	0	0
Fibroblasts	Mmp2	0	3.02939	0.772	0.033	0	0	3.16541	0.542	0.006	0	0	2.90314	0.411	0.007	0	0	0
Fibroblasts	Dpep1	0	3.94194	0.881	0.01	0	0	3.45653	0.566	0.004	0	0	3.31763	0.522	0.001	0	0	0
Fibroblasts	Mmp3	0	4.30204	0.634	0.005	0	0	3.84392	0.525	0.002	0	0	3.81836	0.448	0	0	0	0
Fibroblasts	Crabp1	0	4.24826	0.717	0.006	0	0	4.31172	0.661	0.002	0	0	4.27542	0.545	0	0	0	0
Fibroblasts	Clec3b	0	3.37965	0.742	0.004	0	0	3.10769	0.486	0.001	0	0	3.08093	0.402	0	0	0	0
Fibroblasts	Col6a1	0	3.37713	0.826	0.005	0	0	3.20584	0.545	0.002	0	0	2.89668	0.411	0.004	0	0	0
Fibroblasts	Dcn	0	7.15161	0.999	0.083	0	0	6.9228	0.997	0.052	0	0	6.87851	0.998	0.03	0	0	0
Fibroblasts	Lum	0	4.30855	0.934	0.007	0	0	3.9894	0.737	0.003	0	0	3.69217	0.577	0.001	0	0	0
Fibroblasts	Aebp1	0	3.0158	0.75	0.023	0	0	2.58294	0.428	0.009	0	0	2.9166	0.439	0.007	0	0	0
Fibroblasts	Sparc	0	2.89113	0.95	0.256	0	0	3.89465	0.952	0.145	0	0	3.80135	0.848	0.096	0	0	0
Fibroblasts	Serpinf1	0	3.81496	0.879	0.026	0	0	3.81556	0.71	0.006	0	0	3.62521	0.579	0.004	0	0	0
Fibroblasts	Ccl11	0	4.00943	0.872	0.008	0	0	3.01206	0.482	0.003	0	0	3.2795	0.499	0.004	0	0	0
Fibroblasts	Col1a1	0	4.3808	0.931	0.01	0	0	4.27721	0.719	0.005	0	0	4.03502	0.582	0.003	0	0	0
Fibroblasts	Igfbp4	0	3.68082	0.927	0.119	0	0	3.14547	0.613	0.036	0	0	3.3025	0.577	0.026	0	0	0
Ltf+ epithelial	Gsta3	1.32257e-111	2.91539	0.767	0.209	2.3506e-107	0	4.02331	0.833	0.108	0	0	3.95589	0.796	0.094	0	1.32257e-111	0
Ltf+ epithelial	F5	1.83051e-294	1.91946	0.333	0.007	3.25337e-290	0	2.41354	0.403	0.003	0	0	2.523	0.416	0.004	0	1.83051e-294	0
Ltf+ epithelial	Pglyrp1	4.83233e-146	1.27581	0.329	0.021	8.5885e-142	0	3.04665	0.597	0.011	0	0	3.18646	0.599	0.011	0	4.83233e-146	0
Ltf+ epithelial	Cxcl17	8.41162e-258	1.97166	0.419	0.017	1.495e-253	0	2.44417	0.445	0.008	0	0	2.61067	0.434	0.005	0	8.41162e-258	0
Ltf+ epithelial	Cyp2f2	1.46618e-170	4.40588	0.838	0.16	2.60585e-166	0	5.20592	0.786	0.053	0	0	5.3198	0.826	0.042	0	1.46618e-170	0
Ltf+ epithelial	Dmbt1	9.56514e-203	4.29785	0.305	0.011	1.70001e-198	0	4.26032	0.469	0.01	0	0	4.5161	0.503	0.009	0	9.56514e-203	0
Ltf+ epithelial	Cryab	2.99849e-90	3.27314	0.667	0.178	5.32921e-86	0	4.84353	0.85	0.115	0	0	4.47127	0.805	0.079	0	2.99849e-90	0
Ltf+ epithelial	Ltf	5.6317e-93	6.14119	0.357	0.046	1.00092e-88	0	6.97619	0.757	0.064	0	0	7.02769	0.799	0.081	0	5.6317e-93	0
Ltf+ epithelial	Sftpd	1.00188e-226	3.12474	0.419	0.021	1.78063e-222	0	4.75728	0.813	0.016	0	0	4.73417	0.781	0.02	0	1.00188e-226	0
Ltf+ epithelial	Fcgbp	2.49241e-196	2.66913	0.271	0.008	4.42977e-192	0	3.14071	0.418	0.007	0	2.00632e-302	3.33731	0.392	0.006	3.56583e-298	2.49241e-196	0
Ltf+ epithelial	Ccl9	1.73497e-84	2.17203	0.305	0.035	3.08356e-80	4.30423e-274	2.80133	0.518	0.036	7.64991e-270	4.72983e-304	3.106	0.575	0.032	8.40633e-300	1.73497e-84	1.41895e-303
Ltf+ epithelial	Cyp2a5	1.7543e-47	3.71838	0.357	0.087	3.11792e-43	4.21984e-291	3.88639	0.494	0.029	7.49992e-287	4.13703e-298	3.59816	0.494	0.021	7.35274e-294	1.7543e-47	1.24111e-297
Ltf+ epithelial	4833423E24Rik	1.73633e-119	1.04153	0.319	0.025	3.08597e-115	1.32772e-280	1.68215	0.319	0.003	2.35977e-276	6.79793e-257	1.97329	0.311	0.003	1.2082e-252	1.73633e-119	3.98317e-280
Ltf+ epithelial	St6galnac1	3.87266e-265	0.757762	0.21	0.001	6.88288e-261	5.32295e-05	0.736724	0.155	0.103	0.946048	0.000565258	0.616617	0.105	0.062	1	0.000565258	1.1618e-264
Ltf+ epithelial	Acsm1	1.07299e-138	1.63954	0.452	0.046	1.90703e-134	1.7349e-258	1.9312	0.366	0.011	3.08344e-254	8.94044e-247	2.04463	0.338	0.006	1.58898e-242	1.07299e-138	5.20471e-258
Ltf+ epithelial	Wfdc18	2.73662e-133	4.65553	0.981	0.407	4.8638e-129	3.91441e-254	7.48971	0.985	0.503	6.95708e-250	1.15226e-222	7.3599	0.988	0.448	2.04791e-218	2.73662e-133	1.17432e-253
Ltf+ epithelial	Gstm1	5.01356e-27	1.36236	0.557	0.268	8.91059e-23	8.77092e-251	2.78434	0.646	0.081	1.55886e-246	1.84599e-187	2.28089	0.527	0.056	3.28088e-183	5.01356e-27	2.63128e-250
Ltf+ epithelial	Krt18	7.08453e-84	2.90965	0.643	0.184	1.25913e-79	1.4117e-239	3.99777	0.865	0.271	2.50902e-235	2.44393e-190	4.09548	0.853	0.288	4.3436e-186	7.08453e-84	4.23511e-239
Ltf+ epithelial	Ces1d	2.50616e-81	1.80197	0.529	0.115	4.4542e-77	2.18017e-220	2.502	0.526	0.058	3.87482e-216	5.22503e-205	2.43474	0.467	0.038	9.28645e-201	2.50616e-81	6.54052e-220
Ltf+ epithelial	Cyp4a12b	1.22022e-218	0.849718	0.181	0.001	2.16869e-214	0.00240525	0.65985	0.111	0.076	1	0.00283634	0.755268	0.123	0.084	1	0.00283634	3.66065e-218
Ltf+ epithelial	Aox3	9.63467e-36	1.14776	0.481	0.165	1.71237e-31	1.97382e-140	1.6707	0.381	0.042	3.50806e-136	1.23783e-216	2.02253	0.398	0.019	2.19999e-212	9.63467e-36	3.71348e-216
Ltf+ epithelial	Epcam	4.245e-106	2.07786	0.771	0.205	7.54463e-102	1.6355e-203	3.01278	0.764	0.199	2.90677e-199	2.96722e-216	3.33095	0.787	0.163	5.27365e-212	4.245e-106	8.90167e-216
Ltf+ epithelial	A2ml1	3.06763e-113	2.09099	0.352	0.035	5.45209e-109	4.60655e-132	1.64295	0.177	0.004	8.18722e-128	6.44582e-209	1.91062	0.254	0.002	1.14562e-204	3.06763e-113	1.93375e-208
Ltf+ epithelial	Lmo4	1.79077e-48	1.64615	0.686	0.293	3.18273e-44	2.90123e-208	2.63959	0.658	0.114	5.15636e-204	3.13323e-179	2.60988	0.62	0.096	5.56869e-175	1.79077e-48	8.70369e-208
Ltf+ epithelial	Gpx2	3.016e-28	0.551665	0.214	0.044	5.36033e-24	1.03059e-207	2.14116	0.366	0.02	1.83166e-203	9.30444e-117	1.3199	0.207	0.009	1.65368e-112	3.016e-28	3.09176e-207
Lymhpoid	Nkg7	0	2.93092	0.369	0.005	0	4.74397e-216	2.4284	0.238	0.001	8.43146e-212	1.4296e-248	2.81039	0.278	0.001	2.54083e-244	4.74397e-216	0
Lymhpoid	Xcl1	0	3.08578	0.305	0.007	0	1.13974e-186	2.8317	0.225	0.002	2.02565e-182	1.62505e-194	3.01074	0.235	0.002	2.8882e-190	1.13974e-186	0
Lymhpoid	Ms4a4b	0	2.46225	0.361	0.006	0	1.01366e-142	1.77624	0.167	0.001	1.80159e-138	2.08666e-194	2.38724	0.23	0.002	3.70861e-190	1.01366e-142	0
Lymhpoid	Vps37b	0	2.87139	0.455	0.044	0	1.47462e-117	2.51726	0.275	0.017	2.62085e-113	3.60493e-158	2.62809	0.291	0.016	6.40705e-154	1.47462e-117	0
Lymhpoid	Trbc2	0	2.36067	0.416	0.003	0	6.52336e-141	1.66703	0.146	0	1.1594e-136	2.76979e-150	2.23318	0.172	0.001	4.92275e-146	6.52336e-141	0
Lymhpoid	Ptprcap	0	2.28949	0.454	0.006	0	2.50805e-131	1.7228	0.158	0.002	4.45757e-127	6.54407e-136	1.99046	0.167	0.002	1.16308e-131	2.50805e-131	0
Lymhpoid	Ltb	0	2.4341	0.475	0.011	0	3.48436e-166	2.01249	0.183	0.001	6.19276e-162	1.56637e-116	1.98987	0.159	0.003	2.7839e-112	1.56637e-116	0
Lymhpoid	Trbc1	0	2.13672	0.355	0.002	0	7.04981e-105	1.95449	0.121	0.001	1.25296e-100	1.64839e-111	1.88493	0.132	0.001	2.92968e-107	7.04981e-105	0
Lymhpoid	Hcst	0	2.1627	0.452	0.018	0	4.07459e-103	1.78726	0.162	0.004	7.24177e-99	5.64018e-101	1.89438	0.156	0.005	1.00243e-96	5.64018e-101	0
Lymhpoid	Itk	0	1.92917	0.303	0.003	0	6.04395e-109	1.72064	0.125	0.001	1.07419e-104	1.89573e-87	1.65447	0.106	0.001	3.36927e-83	1.89573e-87	0
Lymhpoid	2023-09-01	0	1.56275	0.305	0.011	0	1.5361e-83	1.66374	0.117	0.002	2.73011e-79	1.17195e-57	1.40163	0.101	0.005	2.08291e-53	1.17195e-57	0
Lymhpoid	Sh2d2a	3.26209e-296	1.47219	0.235	0.003	5.79771e-292	6.44716e-100	1.3761	0.108	0	1.14585e-95	2.95288e-92	1.46923	0.106	0	5.24815e-88	2.95288e-92	9.78627e-296
Lymhpoid	Il7r	1.55619e-286	2.30282	0.369	0.029	2.76582e-282	3.39795e-60	2.01441	0.158	0.012	6.03918e-56	6.46189e-55	1.75027	0.132	0.011	1.14847e-50	6.46189e-55	4.66858e-286
Lymhpoid	Rac2	3.07528e-285	2.09881	0.518	0.078	5.46569e-281	8.72872e-48	1.52514	0.196	0.025	1.55136e-43	9.68623e-66	1.93104	0.19	0.022	1.72153e-61	8.72872e-48	9.22583e-285
Lymhpoid	Il2rg	7.0651e-285	1.82271	0.389	0.034	1.25568e-280	9.16183e-59	1.63649	0.162	0.013	1.62833e-54	8.90275e-46	1.35534	0.122	0.012	1.58229e-41	8.90275e-46	2.11953e-284
Lymhpoid	Cd3g	2.26263e-273	1.7161	0.206	0.001	4.02137e-269	3.20532e-116	1.80819	0.121	0	5.69681e-112	5.55275e-114	1.78643	0.138	0.001	9.86891e-110	5.55275e-114	6.78788e-273
Lymhpoid	Rps24	3.28104e-264	1.3542	0.994	0.962	5.83139e-260	1.71693e-91	1.63792	0.992	0.915	3.05149e-87	1.00128e-104	1.42619	0.968	0.898	1.77958e-100	1.71693e-91	9.84312e-264
Lymhpoid	Rpl12	9.77862e-255	1.46769	0.99	0.902	1.73795e-250	3.16912e-73	1.79405	0.908	0.734	5.63247e-69	3.377e-59	1.46064	0.815	0.713	6.00195e-55	3.377e-59	2.93359e-254
Lymhpoid	Rps15a	2.34881e-253	1.38407	0.982	0.907	4.17454e-249	7.18497e-72	1.71192	0.925	0.787	1.27698e-67	1.8052e-89	1.5857	0.907	0.779	3.20838e-85	7.18497e-72	7.04642e-253
Lymhpoid	S100a4	1.23173e-242	2.47532	0.424	0.055	2.18915e-238	1.20583e-35	1.97089	0.283	0.068	2.14312e-31	1.12037e-32	1.40557	0.217	0.056	1.99123e-28	1.12037e-32	3.69518e-242
Lymhpoid	Cd69	2.46276e-237	2.23607	0.472	0.074	4.37707e-233	2.52865e-72	2.31803	0.217	0.019	4.49417e-68	3.53722e-56	1.81999	0.159	0.017	6.28671e-52	3.53722e-56	7.38829e-237
Lymhpoid	Stk17b	6.97353e-235	2.09129	0.5	0.091	1.23941e-230	1.8289e-31	1.54866	0.158	0.025	3.2505e-27	6.94323e-54	1.82499	0.167	0.021	1.23402e-49	1.8289e-31	2.09206e-234
Lymhpoid	Rpsa	1.10285e-233	1.38787	0.975	0.907	1.9601e-229	4.65879e-67	1.51359	0.95	0.813	8.28007e-63	2.70686e-58	1.34991	0.839	0.795	4.8109e-54	2.70686e-58	3.30856e-233
Lymhpoid	H2-Q7	3.03754e-232	2.12957	0.631	0.171	5.39862e-228	3.46187e-58	1.97497	0.262	0.037	6.15279e-54	4.98901e-45	1.82935	0.209	0.041	8.86698e-41	4.98901e-45	9.11262e-232
Lymhpoid	Cd52	1.58863e-222	1.75949	0.792	0.231	2.82347e-218	7.65309e-73	1.89127	0.588	0.151	1.36018e-68	3.21493e-93	1.85158	0.571	0.154	5.7139e-89	7.65309e-73	4.76589e-222
Macrophages	Rgs1	0	4.21781	0.927	0.091	0	0	3.03559	0.628	0.042	0	0	3.08539	0.617	0.039	0	0	0
Macrophages	Fcer1g	0	3.66685	0.954	0.075	0	0	3.45835	0.852	0.057	0	0	3.49738	0.846	0.059	0	0	0
Macrophages	Il1b	0	3.24068	0.626	0.017	0	0	2.95053	0.555	0.043	0	0	3.35637	0.554	0.037	0	0	0
Macrophages	Ctss	0	4.63313	0.976	0.04	0	0	3.58486	0.754	0.035	0	0	3.80213	0.755	0.031	0	0	0
Macrophages	C1qb	0	5.26102	0.98	0.026	0	0	5.02424	0.918	0.013	0	0	5.14028	0.898	0.01	0	0	0
Macrophages	C1qc	0	4.67862	0.966	0.013	0	0	4.22735	0.795	0.004	0	0	4.31666	0.751	0.004	0	0	0
Macrophages	C1qa	0	5.40977	0.988	0.027	0	0	5.14945	0.913	0.01	0	0	5.3109	0.887	0.011	0	0	0
Macrophages	Cxcl2	0	4.96719	0.704	0.048	0	0	5.67006	0.844	0.042	0	0	5.73411	0.815	0.028	0	0	0
Macrophages	Tyrobp	0	3.28975	0.952	0.071	0	0	2.97889	0.801	0.066	0	0	2.83874	0.726	0.063	0	0	0
Macrophages	Bcl2a1b	0	3.03542	0.785	0.029	0	0	3.4449	0.644	0.022	0	0	3.53391	0.604	0.023	0	0	0
Macrophages	Ccrl2	0	3.31891	0.782	0.052	0	0	2.82329	0.498	0.025	0	0	3.31252	0.568	0.02	0	0	0
Macrophages	Ccl3	0	5.79047	0.956	0.086	0	0	4.93813	0.874	0.038	0	0	5.32853	0.842	0.036	0	0	0
Macrophages	Ccl4	0	6.83598	0.976	0.146	0	0	5.91763	0.938	0.079	0	0	5.75905	0.96	0.081	0	0	0
Macrophages	Cd83	0	3.16921	0.726	0.024	0	0	2.68387	0.489	0.026	0	0	3.02977	0.505	0.023	0	0	0
Macrophages	Lgals3	0	2.54543	0.577	0.055	0	0	3.28064	0.647	0.07	0	0	3.39512	0.648	0.06	0	0	0
Macrophages	Basp1	0	2.52553	0.786	0.109	0	0	2.76876	0.535	0.029	0	0	2.93147	0.519	0.022	0	0	0
Macrophages	H2-Ab1	0	5.08025	0.972	0.091	0	0	3.60045	0.95	0.073	0	0	3.65178	0.938	0.071	0	0	0
Macrophages	H2-Aa	0	5.23737	0.979	0.08	0	0	3.67098	0.964	0.076	0	0	3.63183	0.955	0.073	0	0	0
Macrophages	H2-Eb1	0	5.24362	0.978	0.085	0	0	3.76686	0.962	0.076	0	0	3.83555	0.947	0.074	0	0	0
Macrophages	Aif1	0	3.32293	0.84	0.018	0	0	2.82479	0.541	0.019	0	0	3.09315	0.544	0.018	0	0	0
Macrophages	Tnf	0	4.12585	0.85	0.047	0	0	3.94586	0.713	0.019	0	0	4.20491	0.693	0.016	0	0	0
Macrophages	Cd74	0	5.80198	0.994	0.121	0	0	4.09307	0.991	0.106	0	0	4.12583	0.978	0.098	0	0	0
Macrophages	Ms4a7	0	3.82148	0.871	0.013	0	0	3.19256	0.568	0.002	0	0	3.52459	0.575	0.003	0	0	0
Macrophages	Cybb	0	4.07169	0.931	0.03	0	0	2.99726	0.588	0.02	0	0	3.09986	0.528	0.016	0	0	0
Macrophages	Apoe	0	3.92737	0.989	0.584	0	9.80139e-265	2.99393	0.929	0.355	1.742e-260	8.62311e-296	3.58126	0.931	0.271	1.53259e-291	9.80139e-265	0
Monocytes/Dendritic cells	Lsp1	2.08287e-109	3.26275	0.926	0.135	3.70189e-105	0	3.16223	0.604	0.026	0	1.69398e-307	3.26837	0.585	0.024	3.01071e-303	2.08287e-109	0
Monocytes/Dendritic cells	S100a4	5.44937e-123	3.36391	0.815	0.084	9.68517e-119	0	3.43482	0.706	0.045	0	2.39524e-270	3.54668	0.627	0.039	4.25706e-266	5.44937e-123	0
Monocytes/Dendritic cells	Cd209a	0	2.3709	0.383	0.001	0	3.60338e-239	2.16345	0.249	0	6.40429e-235	2.33471e-136	1.93658	0.157	0.001	4.14949e-132	2.33471e-136	0
Monocytes/Dendritic cells	Ccr7	0	2.14008	0.309	0.002	0	1.19014e-171	2.22987	0.233	0.004	2.11523e-167	1.17069e-100	1.88036	0.153	0.003	2.08067e-96	1.17069e-100	0
Monocytes/Dendritic cells	Mcemp1	0	1.35784	0.346	0.001	0	9.51347e-114	1.16137	0.118	0	1.69083e-109	1.73502e-92	1.29014	0.102	0	3.08366e-88	1.73502e-92	0
Monocytes/Dendritic cells	Napsa	4.79981e-266	2.10232	0.605	0.017	8.5307e-262	1.86914e-192	2.09425	0.318	0.01	3.32202e-188	9.773e-170	2.15572	0.25	0.005	1.73696e-165	9.773e-170	1.43994e-265
Monocytes/Dendritic cells	H2-Aa	6.26645e-52	2.30196	0.914	0.24	1.11374e-47	1.36142e-193	2.73156	0.902	0.157	2.41965e-189	3.15625e-181	2.89522	0.852	0.144	5.6096e-177	6.26645e-52	4.08425e-193
Monocytes/Dendritic cells	H2-Ab1	1.60063e-51	2.40944	0.901	0.248	2.8448e-47	2.43116e-187	2.77662	0.873	0.153	4.32091e-183	2.44248e-172	2.82653	0.826	0.142	4.34101e-168	1.60063e-51	7.29349e-187
Monocytes/Dendritic cells	Ccl22	2.38696e-186	1.90969	0.247	0.003	4.24235e-182	2.52646e-52	1.85905	0.118	0.007	4.49028e-48	2.38229e-43	1.63332	0.106	0.007	4.23404e-39	2.38229e-43	7.16089e-186
Monocytes/Dendritic cells	H2-Eb1	8.95351e-50	2.23328	0.914	0.244	1.59131e-45	3.0549e-182	2.60259	0.89	0.157	5.42948e-178	1.41629e-161	2.6196	0.826	0.145	2.51716e-157	8.95351e-50	9.1647e-182
Monocytes/Dendritic cells	Cd74	1.01898e-46	2.05299	0.963	0.276	1.81104e-42	6.43454e-182	2.55283	0.955	0.185	1.14361e-177	2.23152e-172	2.6237	0.907	0.167	3.96607e-168	1.01898e-46	1.93036e-181
Monocytes/Dendritic cells	Alox5ap	3.70356e-79	2.10812	0.704	0.093	6.58234e-75	7.06274e-178	2.29803	0.441	0.031	1.25526e-173	5.86413e-121	2.28518	0.318	0.022	1.04223e-116	3.70356e-79	2.11882e-177
Monocytes/Dendritic cells	Tyrobp	1.18686e-41	1.53029	0.914	0.228	2.1094e-37	5.12911e-159	2.26982	0.788	0.131	9.11596e-155	1.69176e-123	2.41131	0.661	0.116	3.00676e-119	1.18686e-41	1.53873e-158
Monocytes/Dendritic cells	Cytip	2.5376e-74	1.63886	0.556	0.058	4.51007e-70	1.45223e-147	1.95322	0.331	0.019	2.58105e-143	1.05135e-79	1.64269	0.212	0.015	1.86857e-75	2.5376e-74	4.35669e-147
Monocytes/Dendritic cells	Il1b	8.26908e-20	2.37414	0.457	0.127	1.46966e-15	3.01102e-140	2.99704	0.596	0.086	5.35149e-136	2.16549e-86	2.49249	0.47	0.08	3.84873e-82	8.26908e-20	9.03307e-140
Monocytes/Dendritic cells	Coro1a	3.63181e-59	1.97844	0.877	0.18	6.45481e-55	1.32814e-139	2.25382	0.514	0.061	2.3605e-135	6.79193e-76	1.99561	0.364	0.054	1.20713e-71	3.63181e-59	3.98442e-139
Monocytes/Dendritic cells	Cd52	2.73134e-46	1.97334	0.951	0.28	4.85441e-42	1.26813e-136	2.25376	0.751	0.142	2.25385e-132	1.77009e-135	2.34692	0.788	0.156	3.14597e-131	2.73134e-46	3.80439e-136
Monocytes/Dendritic cells	Traf1	9.17451e-110	2.19958	0.642	0.054	1.63059e-105	4.20242e-130	2.05159	0.327	0.022	7.46896e-126	1.33203e-79	2.04466	0.271	0.027	2.36742e-75	1.33203e-79	1.26073e-129
Monocytes/Dendritic cells	Tmsb4x	4.35517e-40	2.23305	1	0.906	7.74044e-36	4.28681e-128	2.52984	1	0.779	7.61895e-124	2.51406e-118	2.65704	0.996	0.789	4.46825e-114	4.35517e-40	1.28604e-127
Monocytes/Dendritic cells	Ms4a4c	2.66772e-36	1.19534	0.21	0.017	4.74134e-32	7.27664e-127	1.81811	0.237	0.01	1.29328e-122	1.24037e-111	2.22848	0.237	0.012	2.2045e-107	2.66772e-36	2.18299e-126
Monocytes/Dendritic cells	H2-DMa	9.73226e-66	2.35287	0.765	0.14	1.72971e-61	9.00516e-126	2.2301	0.437	0.048	1.60049e-121	9.66321e-82	2.08044	0.331	0.041	1.71744e-77	9.73226e-66	2.70155e-125
Monocytes/Dendritic cells	Actb	3.09112e-37	1.7959	1	0.914	5.49384e-33	7.63559e-106	2.06434	0.992	0.779	1.35707e-101	6.29721e-113	2.34886	0.996	0.739	1.1192e-108	3.09112e-37	1.88916e-112
Monocytes/Dendritic cells	Plbd1	3.10751e-81	2.11348	0.58	0.06	5.52297e-77	1.6865e-102	1.64116	0.253	0.017	2.99741e-98	7.2024e-112	1.88754	0.242	0.012	1.28008e-107	3.10751e-81	2.16072e-111
Monocytes/Dendritic cells	Cst3	4.3415e-32	2.21368	0.988	0.672	7.71615e-28	1.96163e-110	2.7278	0.918	0.362	3.48641e-106	3.65462e-109	3.07057	0.864	0.293	6.49536e-105	4.3415e-32	5.88489e-110
Monocytes/Dendritic cells	Fau	5.34785e-33	1.29817	1	0.937	9.50474e-29	5.18054e-109	1.7413	1	0.872	9.20737e-105	3.90557e-91	1.74186	0.979	0.865	6.94137e-87	5.34785e-33	1.55416e-108
Mural	Rgs5	0	6.60883	0.786	0.01	0	0	4.86222	0.667	0.003	0	0	4.94399	0.619	0.002	0	0	0
Mural	Des	0	3.11712	0.833	0.01	0	4.05508e-183	3.21366	0.5	0.006	7.20709e-179	4.31995e-301	3.48938	0.5	0.003	7.67785e-297	4.05508e-183	0
Mural	Rgs4	0	2.87803	0.571	0.001	0	3.58763e-138	1.28582	0.133	0	6.3763e-134	1.29493e-257	2.8551	0.286	0	2.30147e-253	3.58763e-138	0
Mural	Notch3	0	3.43272	0.81	0.004	0	4.0088e-180	2.55412	0.367	0.003	7.12484e-176	9.69629e-187	3.30391	0.31	0.002	1.72332e-182	4.0088e-180	0
Mural	Gm13861	0	1.51717	0.333	0	0	3.58763e-138	1.47355	0.133	0	6.3763e-134	1.14992e-186	2.03267	0.19	0	2.04376e-182	3.58763e-138	0
Mural	Cox4i2	0	2.46829	0.5	0.002	0	4.28266e-154	2.80065	0.3	0.002	7.61158e-150	1.37188e-117	2.29757	0.214	0.002	2.43825e-113	1.37188e-117	0
Mural	Slc38a11	3.30533e-260	1.02679	0.19	0	5.87457e-256	4.25938e-104	1.06537	0.1	0	7.5702e-100	2.42392e-117	1.4544	0.119	0	4.30804e-113	4.25938e-104	9.916e-260
Mural	Gucy1b1	1.29619e-247	2.83562	0.69	0.014	2.30371e-243	1.99242e-120	2.1758	0.3	0.003	3.54113e-116	1.18419e-136	2.45498	0.238	0.002	2.10467e-132	1.99242e-120	3.88856e-247
Mural	Mustn1	1.37312e-247	3.33827	0.738	0.016	2.44044e-243	3.11417e-180	3.0713	0.433	0.004	5.53482e-176	4.16638e-88	2.91964	0.31	0.007	7.4049e-84	4.16638e-88	4.11935e-247
Mural	Sncg	2.20069e-221	2.81121	0.667	0.014	3.91129e-217	2.03956e-106	2.64827	0.333	0.005	3.62491e-102	1.01284e-89	2.46553	0.262	0.004	1.80012e-85	1.01284e-89	6.60207e-221
Mural	Pde3a	6.84378e-148	2.6848	0.643	0.022	1.21635e-143	8.26648e-72	1.45703	0.167	0.001	1.4692e-67	9.4795e-189	2.51474	0.214	0	1.68479e-184	8.26648e-72	2.84385e-188
Mural	Aspn	4.72303e-179	2.74656	0.762	0.025	8.39425e-175	2.51696e-25	2.14784	0.233	0.012	4.47339e-21	6.30853e-26	1.48854	0.143	0.006	1.12121e-21	2.51696e-25	1.41691e-178
Mural	Gucy1a1	2.69346e-176	3.14272	0.81	0.03	4.78708e-172	1.39307e-114	2.64034	0.433	0.008	2.4759e-110	5.92484e-111	2.68324	0.286	0.004	1.05302e-106	5.92484e-111	8.08038e-176
Mural	Gm13889	2.53708e-82	3.14061	0.762	0.059	4.50916e-78	3.07478e-98	3.44616	0.533	0.015	5.4648e-94	1.58067e-170	4.11637	0.643	0.016	2.80932e-166	2.53708e-82	4.74201e-170
Mural	Gja4	6.11238e-68	1.62547	0.31	0.011	1.08635e-63	3.53838e-21	1.00899	0.1	0.003	6.28877e-17	5.66962e-157	2.14603	0.214	0.001	1.00766e-152	3.53838e-21	1.70088e-156
Mural	Myh11	3.60835e-155	4.41722	0.929	0.046	6.41313e-151	5.13207e-53	3.82967	0.633	0.045	9.12123e-49	8.23967e-64	3.60834	0.548	0.037	1.46444e-59	5.13207e-53	1.08251e-154
Mural	Mnd1	4.18213e-131	2.70497	0.452	0.012	7.43289e-127	4.42781e-154	2.41369	0.3	0.002	7.86954e-150	5.50723e-40	1.74092	0.143	0.003	9.78799e-36	5.50723e-40	1.32834e-153
Mural	Rcan2	3.9503e-138	1.87166	0.381	0.007	7.02087e-134	2.71846e-21	1.34308	0.1	0.003	4.83151e-17	1.35798e-36	1.31701	0.119	0.002	2.41354e-32	2.71846e-21	1.18509e-137
Mural	Ndufa4l2	2.85621e-129	3.24643	0.762	0.037	5.07635e-125	9.82069e-86	3.00186	0.5	0.016	1.74543e-81	5.12017e-64	2.13916	0.262	0.007	9.10007e-60	5.12017e-64	8.56864e-129
Mural	Acta2	5.43255e-128	4.53915	0.952	0.06	9.65526e-124	4.79831e-49	3.66924	0.8	0.078	8.52804e-45	1.19327e-88	4.06939	0.833	0.062	2.12079e-84	4.79831e-49	1.62976e-127
Mural	Tagln	6.63032e-128	4.68093	0.905	0.054	1.17841e-123	7.84801e-57	3.99004	0.8	0.068	1.39483e-52	2.71372e-85	4.28929	0.762	0.055	4.82309e-81	7.84801e-57	1.9891e-127
Mural	Hspb2	2.26057e-108	1.92172	0.405	0.011	4.0177e-104	9.66934e-33	1.29313	0.133	0.003	1.71853e-28	1.586e-87	2.09207	0.19	0.002	2.8188e-83	9.66934e-33	6.7817e-108
Mural	Ppp1r14a	6.55324e-102	2.39148	0.5	0.019	1.16471e-97	1.48122e-81	2.78823	0.4	0.01	2.63258e-77	5.27896e-94	2.89835	0.333	0.008	9.38229e-90	1.48122e-81	1.96597e-101
Mural	Lmod1	4.43079e-94	2.2354	0.595	0.03	7.87484e-90	3.21828e-30	1.99511	0.333	0.021	5.71985e-26	2.37094e-09	1.27131	0.119	0.013	4.21387e-05	2.37094e-09	1.32924e-93
Mural	Wtip	8.41391e-83	2.86773	0.738	0.058	1.4954e-78	6.51413e-47	2.39841	0.367	0.016	1.15776e-42	5.39378e-17	1.71129	0.167	0.013	9.58637e-13	5.39378e-17	2.52417e-82
Myoepithelial	Igfbp2	0	4.03702	0.924	0.012	0	0	4.32567	0.827	0.006	0	0	4.42948	0.859	0.006	0	0	0
Myoepithelial	Igfbp5	0	3.34433	0.987	0.164	0	0	3.87591	0.798	0.03	0	0	3.52391	0.719	0.031	0	0	0
Myoepithelial	Myl9	0	3.98819	0.956	0.078	0	0	4.02884	0.876	0.019	0	0	4.00467	0.781	0.017	0	0	0
Myoepithelial	Tpm2	0	4.97003	0.968	0.118	0	0	5.26753	0.974	0.036	0	0	5.14813	0.926	0.028	0	0	0
Myoepithelial	Cnn1	0	3.79063	0.852	0.003	0	0	3.78938	0.684	0.002	0	0	3.51031	0.613	0.003	0	0	0
Myoepithelial	Tagln	0	4.59379	0.931	0.019	0	0	4.74331	0.896	0.016	0	0	4.40306	0.816	0.016	0	0	0
Myoepithelial	Cck	0	4.63419	0.921	0.006	0	0	4.92608	0.86	0.005	0	0	5.06776	0.871	0.002	0	0	0
Myoepithelial	Myh11	0	4.17268	0.921	0.01	0	0	3.54692	0.658	0.007	0	0	3.37244	0.609	0.007	0	0	0
Myoepithelial	Mylk	0	3.60168	0.946	0.138	0	0	3.40156	0.759	0.037	0	0	3.5581	0.707	0.025	0	0	0
Myoepithelial	Pcp4	0	3.00896	0.659	0.001	0	0	2.99485	0.505	0.001	0	0	2.63063	0.359	0.001	0	0	0
Myoepithelial	Acta2	0	5.34164	0.987	0.022	0	0	5.42784	0.974	0.021	0	0	5.09201	0.938	0.017	0	0	0
Myoepithelial	Ntrk3	0	2.65607	0.76	0.044	0	2.84799e-247	2.17194	0.336	0.007	5.06174e-243	1.41681e-303	2.45262	0.355	0.002	2.5181e-299	2.84799e-247	0
Myoepithelial	Sfrp1	0	2.99454	0.934	0.135	0	1.33667e-299	2.71984	0.593	0.035	2.37566e-295	4.50209e-289	2.85762	0.547	0.023	8.00156e-285	4.50209e-289	0
Myoepithelial	Krt14	1.81116e-169	1.35909	0.855	0.159	3.21898e-165	0	2.64566	0.801	0.07	0	8.61119e-254	2.82907	0.719	0.061	1.53047e-249	1.81116e-169	0
Myoepithelial	Id4	0	3.88212	0.874	0.04	0	2.17416e-289	2.85235	0.489	0.022	3.86413e-285	1.02613e-245	3.05052	0.441	0.017	1.82374e-241	1.02613e-245	0
Myoepithelial	Nrg1	0	2.20747	0.483	0.004	0	7.14451e-222	1.88788	0.27	0.003	1.26979e-217	1.81819e-219	2.33822	0.27	0.002	3.23147e-215	1.81819e-219	0
Myoepithelial	Lmod1	0	2.23124	0.59	0.007	0	1.32188e-261	1.99831	0.309	0.003	2.34937e-257	1.96969e-180	1.75507	0.215	0.001	3.50074e-176	1.96969e-180	0
Myoepithelial	Lcn2	0	3.12671	0.89	0.088	0	6.78495e-283	3.05595	0.694	0.064	1.20589e-278	3.98257e-177	2.89569	0.543	0.054	7.07822e-173	3.98257e-177	0
Myoepithelial	Aqp4	0	1.34532	0.315	0.002	0	2.10722e-137	1.15653	0.143	0	3.74515e-133	1.37927e-143	1.52247	0.152	0	2.45138e-139	2.10722e-137	0
Myoepithelial	Pgm5	0	1.5005	0.416	0.016	0	1.56655e-90	1.03776	0.121	0.002	2.78422e-86	2.87219e-125	1.42494	0.148	0.001	5.10474e-121	1.56655e-90	0
Myoepithelial	Synpo2	0	1.58806	0.407	0.012	0	1.67045e-132	1.27984	0.173	0.003	2.96889e-128	3.90495e-121	1.5224	0.16	0.002	6.94027e-117	3.90495e-121	0
Myoepithelial	Sema5a	0	2.2761	0.64	0.042	0	1.27158e-133	1.56143	0.231	0.01	2.25997e-129	1.32971e-118	1.63429	0.184	0.004	2.36328e-114	1.32971e-118	0
Myoepithelial	Nrtn	0	2.02242	0.524	0.021	0	1.00141e-102	1.82926	0.316	0.036	1.7798e-98	3.51179e-112	2.13906	0.305	0.025	6.2415e-108	1.00141e-102	0
Myoepithelial	Hgf	0	2.324	0.536	0.021	0	6.88369e-120	1.58207	0.182	0.005	1.22344e-115	4.75665e-108	1.59455	0.164	0.004	8.45399e-104	4.75665e-108	0
Myoepithelial	Fhod3	0	1.83587	0.473	0.007	0	7.09642e-125	1.1782	0.14	0.001	1.26125e-120	2.53131e-107	1.1283	0.129	0.001	4.4989e-103	2.53131e-107	0
