# Supplementary material for: The First Transcriptomic Atlas of the Adult Lacrimal Gland Reveals Epithelial Complexity and Identifies Novel Progenitor Cells in Mice
Source: Cells. 2023 May 21;12(10):1435. doi: 10.3390/cells12101435 (PMC10216974; doi:10.3390/cells12101435)
Supplement: Supplementary file 1 [file cells-12-01435-s001.zip › Table S2 - Top-25 cluster marlers for the lacrimal gland epithelium.xlsx]

## Sheet: Table S2 - Top-25 cluster marle
cluster	p_val	avg_log2FC	pct.1	pct.2	p_val_adj	gene
0. Secreting acinar	0	2.33461	0.925	0.587	0	Lpo
0. Secreting acinar	0	1.77495	0.891	0.54	0	Hp
0. Secreting acinar	0	1.42157	1	0.905	0	mt-Cytb
0. Secreting acinar	0	1.23301	0.972	0.812	0	Dnase1
0. Secreting acinar	0	1.1357	1	1	0	Scgb2b2
0. Secreting acinar	0	1.11627	1	0.931	0	mt-Atp6
0. Secreting acinar	0	1.1137	1	0.915	0	mt-Co2
0. Secreting acinar	0	1.04781	1	0.934	0	mt-Co3
0. Secreting acinar	3.15467e-307	1.7841	0.742	0.328	5.60679e-303	Qsox1
0. Secreting acinar	2.4192e-299	1.73882	0.665	0.239	4.29965e-295	Prom2
0. Secreting acinar	7.80884e-265	0.942411	1	1	1.38787e-260	Scgb1b2
0. Secreting acinar	4.48854e-251	0.910557	1	0.832	7.97748e-247	mt-Nd2
0. Secreting acinar	9.50485e-242	0.926383	1	1	1.6893e-237	Scgb2b24
0. Secreting acinar	2.24832e-240	1.13022	0.999	0.997	3.99593e-236	Scgb2b20
0. Secreting acinar	3.66761e-235	1.00488	0.96	0.628	6.51844e-231	mt-Nd3
0. Secreting acinar	2.69256e-233	1.07976	1	0.998	4.78549e-229	Scgb1b20
0. Secreting acinar	5.27489e-223	1.33609	0.841	0.561	9.37506e-219	P4hb
0. Secreting acinar	1.85137e-214	1.49528	0.823	0.526	3.29043e-210	Gm8978
0. Secreting acinar	1.0824e-211	1.04706	0.999	0.996	1.92376e-207	Scgb1b7
0. Secreting acinar	4.11756e-193	1.46823	0.607	0.286	7.31815e-189	Pigr
0. Secreting acinar	1.37807e-184	1.2003	0.843	0.571	2.44924e-180	Lipo1
0. Secreting acinar	2.18578e-178	1.35653	0.904	0.722	3.88479e-174	Wfdc12
0. Secreting acinar	1.34581e-143	0.888792	0.998	0.987	2.39191e-139	Scgb2b7
0. Secreting acinar	3.25584e-141	1.06799	0.53	0.247	5.7866e-137	Trabd
0. Secreting acinar	1.03004e-138	1.14415	0.567	0.3	1.83069e-134	Chst1
1. Synthesizing acinar	0	1.3278	1	0.994	0	Gm14135
1. Synthesizing acinar	0	1.04963	1	1	0	Gm1553
1. Synthesizing acinar	3.69123e-295	1.09586	1	0.996	6.56043e-291	Esp15
1. Synthesizing acinar	2.8933e-249	0.904633	1	0.945	5.14225e-245	Sval2
1. Synthesizing acinar	1.3255e-239	0.937035	1	1	2.3558e-235	Scgb2b24
1. Synthesizing acinar	4.90238e-236	0.820316	1	1	8.713e-232	Pip
1. Synthesizing acinar	4.98298e-218	0.662539	1	1	8.85624e-214	Esp6
1. Synthesizing acinar	1.30186e-204	0.783479	0.999	0.771	2.3138e-200	Gm12888
1. Synthesizing acinar	5.39402e-193	0.811599	1	0.922	9.58679e-189	Lcn11
1. Synthesizing acinar	6.72221e-192	0.80749	1	0.813	1.19474e-187	Scgb1b24
1. Synthesizing acinar	9.07641e-191	0.658456	1	1	1.61315e-186	Obp1a
1. Synthesizing acinar	1.05299e-186	1.07153	0.999	0.987	1.87148e-182	Scgb2b7
1. Synthesizing acinar	5.82148e-181	1.21856	0.844	0.658	1.03465e-176	Esp16
1. Synthesizing acinar	1.15066e-180	0.835048	1	1	2.04506e-176	Scgb1b2
1. Synthesizing acinar	1.04797e-173	0.713815	1	1	1.86255e-169	Gm5938
1. Synthesizing acinar	2.20144e-164	0.793208	0.999	0.761	3.91262e-160	9530002B09Rik
1. Synthesizing acinar	4.34646e-154	0.797118	1	1	7.72497e-150	Scgb2b2
1. Synthesizing acinar	8.89176e-147	0.968042	0.999	0.997	1.58033e-142	Scgb2b20
1. Synthesizing acinar	2.08431e-139	0.609688	1	1	3.70445e-135	Mucl2
1. Synthesizing acinar	5.02928e-139	0.548435	0.777	0.317	8.93853e-135	Gm43974
1. Synthesizing acinar	3.05028e-128	0.87591	0.763	0.38	5.42126e-124	Scgb2b3
1. Synthesizing acinar	1.2522e-126	0.901658	0.999	0.997	2.22553e-122	Scgb1b7
1. Synthesizing acinar	7.49227e-124	0.882987	0.999	0.999	1.3316e-119	Scgb1b20
1. Synthesizing acinar	8.60271e-124	0.46941	0.507	0.167	1.52896e-119	Scgb2b17
1. Synthesizing acinar	2.01441e-118	0.915387	0.604	0.242	3.58021e-114	Esp24
2. Myoepithelial	0	5.89181	0.968	0.021	0	Acta2
2. Myoepithelial	0	5.28298	0.958	0.088	0	Tpm2
2. Myoepithelial	0	5.0676	0.886	0.013	0	Tagln
2. Myoepithelial	0	4.86867	0.886	0.007	0	Cck
2. Myoepithelial	0	4.45009	0.843	0.061	0	Igfbp5
2. Myoepithelial	0	4.42688	0.877	0.018	0	Myl9
2. Myoepithelial	0	4.31032	0.872	0.012	0	Igfbp2
2. Myoepithelial	0	4.17616	1	0.298	0	Apoe
2. Myoepithelial	0	4.04963	0.739	0.003	0	Myh11
2. Myoepithelial	0	3.72821	0.724	0.003	0	Cnn1
2. Myoepithelial	0	3.62061	0.812	0.08	0	Mylk
2. Myoepithelial	0	3.61489	0.779	0.066	0	Sparc
2. Myoepithelial	0	3.49077	0.674	0.007	0	Sparcl1
2. Myoepithelial	0	3.43377	0.765	0.192	0	Cald1
2. Myoepithelial	0	3.30556	0.615	0.053	0	Id4
2. Myoepithelial	0	3.21587	0.7	0.065	0	Kitl
2. Myoepithelial	0	3.14802	0.962	0.5	0	Myl6
2. Myoepithelial	0	3.04319	0.908	0.441	0	Dstn
2. Myoepithelial	0	2.9064	0.519	0.002	0	Pcp4
2. Myoepithelial	0	2.87736	0.544	0.029	0	Lgals1
2. Myoepithelial	0	2.81032	0.612	0.044	0	Abi3bp
2. Myoepithelial	0	2.77131	0.764	0.212	0	Dbi
2. Myoepithelial	0	2.74172	0.762	0.205	0	Tpm1
2. Myoepithelial	0	2.70385	0.61	0.059	0	Flna
2. Myoepithelial	0	2.65463	0.782	0.213	0	Csrp1
3. Duct 1	0	3.66797	0.964	0.252	0	Atf3
3. Duct 1	0	3.50595	0.732	0.106	0	Dnajb1
3. Duct 1	0	3.37852	0.813	0.09	0	Gadd45b
3. Duct 1	0	2.98659	0.87	0.295	0	Klf6
3. Duct 1	0	2.94403	0.898	0.34	0	Mt1
3. Duct 1	0	2.9394	0.906	0.313	0	Zfp36
3. Duct 1	0	2.88773	0.853	0.201	0	Cebpd
3. Duct 1	0	2.87503	0.957	0.259	0	Egr1
3. Duct 1	0	2.86099	0.994	0.667	0	Jun
3. Duct 1	0	2.79743	0.715	0.126	0	Ccn1
3. Duct 1	0	2.79422	0.874	0.246	0	Fosb
3. Duct 1	0	2.78472	0.987	0.536	0	Fos
3. Duct 1	0	2.7767	0.958	0.527	0	Junb
3. Duct 1	0	2.74881	0.943	0.527	0	Btg2
3. Duct 1	0	2.71606	0.693	0.135	0	Timp3
3. Duct 1	0	2.61031	0.651	0.082	0	Mt2
3. Duct 1	0	2.57486	0.849	0.145	0	Krt17
3. Duct 1	0	2.41944	0.983	0.795	0	H3f3b
3. Duct 1	0	2.35752	0.625	0.089	0	Sfn
3. Duct 1	0	2.34863	0.817	0.203	0	Ier3
3. Duct 1	0	2.34753	0.973	0.696	0	Actg1
3. Duct 1	0	2.31683	0.639	0.128	0	Errfi1
3. Duct 1	0	2.2857	0.584	0.06	0	Smoc2
3. Duct 1	0	2.27342	0.643	0.112	0	Bhlhe40
3. Duct 1	2.86734e-279	2.86774	0.827	0.388	5.09612e-275	Ier2
4. Ltf+ epithelial	0	7.23962	0.843	0.083	0	Ltf
4. Ltf+ epithelial	0	4.9242	0.996	0.615	0	Wfdc18
4. Ltf+ epithelial	0	4.68237	0.559	0.013	0	Dmbt1
4. Ltf+ epithelial	0	4.68072	0.864	0.039	0	Sftpd
4. Ltf+ epithelial	0	4.37882	0.913	0.194	0	Cyp2f2
4. Ltf+ epithelial	0	4.12427	0.893	0.232	0	Cryab
4. Ltf+ epithelial	0	3.62654	0.875	0.464	0	Krt18
4. Ltf+ epithelial	0	3.42693	0.473	0.013	0	Fcgbp
4. Ltf+ epithelial	0	3.41889	0.614	0.015	0	Ccl9
4. Ltf+ epithelial	0	3.33532	0.877	0.298	0	Gsta3
4. Ltf+ epithelial	0	3.12761	0.639	0.017	0	Pglyrp1
4. Ltf+ epithelial	0	2.62136	0.486	0.008	0	F5
4. Ltf+ epithelial	0	2.61878	0.679	0.156	0	Gstm1
4. Ltf+ epithelial	0	2.61495	0.775	0.225	0	Cd81
4. Ltf+ epithelial	0	2.57887	0.776	0.206	0	Tmem176a
4. Ltf+ epithelial	0	2.56173	0.525	0.027	0	Cxcl17
4. Ltf+ epithelial	4.1542e-306	3.87749	0.534	0.088	7.38325e-302	Cyp2a5
4. Ltf+ epithelial	1.3184e-279	2.9733	0.858	0.494	2.34319e-275	Krt8
4. Ltf+ epithelial	2.92004e-270	2.78323	0.867	0.549	5.18978e-266	Prdx1
4. Ltf+ epithelial	4.34201e-259	2.42073	0.839	0.409	7.71705e-255	Epcam
4. Ltf+ epithelial	2.04797e-254	2.89529	0.788	0.378	3.63985e-250	Cyb5a
4. Ltf+ epithelial	1.6487e-245	2.35532	0.731	0.259	2.93024e-241	Lmo4
4. Ltf+ epithelial	8.19012e-240	2.67906	0.694	0.247	1.45563e-235	Tcim
4. Ltf+ epithelial	7.15073e-234	2.23497	0.477	0.091	1.2709e-229	Alas1
4. Ltf+ epithelial	2.55911e-230	2.2289	0.912	0.75	4.54831e-226	Nupr1
5. Duct 2	0	2.7039	0.834	0.122	0	Wfdc2
5. Duct 2	0	2.52098	0.554	0.07	0	Ly6d
5. Duct 2	0	2.50789	0.687	0.1	0	Crisp1
5. Duct 2	0	2.47322	0.952	0.248	0	S100a6
5. Duct 2	0	2.19779	0.83	0.174	0	Krt5
5. Duct 2	0	2.18723	0.657	0.091	0	Dapl1
5. Duct 2	0	2.12139	0.72	0.137	0	Tfcp2l1
5. Duct 2	0	2.00111	0.924	0.239	0	Krt14
5. Duct 2	0	1.93025	0.764	0.161	0	Krt17
5. Duct 2	6.65859e-302	2.00035	0.503	0.065	1.18343e-297	Ly6a
5. Duct 2	1.49621e-301	1.97102	0.461	0.05	2.65921e-297	Gpha2
5. Duct 2	2.56521e-294	1.77577	0.989	0.924	4.55915e-290	Rpl13
5. Duct 2	3.45206e-279	1.76115	0.981	0.863	6.13535e-275	Rpl23
5. Duct 2	2.40602e-276	2.00375	0.72	0.169	4.27622e-272	Cbr2
5. Duct 2	5.01334e-276	1.71666	0.985	0.922	8.91021e-272	Rplp1
5. Duct 2	2.44417e-269	1.89383	0.963	0.816	4.34403e-265	Rps12
5. Duct 2	2.68369e-260	1.7464	0.967	0.823	4.76972e-256	Rpl30
5. Duct 2	1.40767e-246	1.90037	0.946	0.734	2.50186e-242	Rps19
5. Duct 2	2.66303e-245	1.78759	0.745	0.222	4.73301e-241	Cst3
5. Duct 2	1.66764e-239	1.72346	0.954	0.836	2.96389e-235	Rpl27a
5. Duct 2	1.66538e-230	1.70177	0.952	0.793	2.95988e-226	Rps16
5. Duct 2	1.7967e-221	1.73641	0.93	0.752	3.19327e-217	Rps5
5. Duct 2	1.34727e-215	1.70506	0.926	0.739	2.3945e-211	Rpl12
5. Duct 2	6.07507e-208	1.72332	0.926	0.65	1.07972e-203	Ptma
5. Duct 2	1.65318e-204	2.12687	0.657	0.211	2.93819e-200	Xist
6. Intermediate acinar 1	3.40199e-171	0.840603	1	1	6.04635e-167	Gm5938
6. Intermediate acinar 1	7.46213e-147	0.678721	1	1	1.32625e-142	Obp1a
6. Intermediate acinar 1	4.82982e-129	0.789413	1	1	8.58404e-125	Mucl2
6. Intermediate acinar 1	9.72096e-121	0.683	1	1	1.72771e-116	Pip
6. Intermediate acinar 1	4.47736e-115	0.797059	1	1	7.95762e-111	Scgb1b2
6. Intermediate acinar 1	1.16423e-106	0.79476	1	1	2.06918e-102	Scgb2b2
6. Intermediate acinar 1	3.16679e-99	0.76745	0.993	0.949	5.62834e-95	Sval2
6. Intermediate acinar 1	3.24051e-82	0.657724	0.999	0.996	5.75936e-78	Esp15
6. Intermediate acinar 1	2.68296e-81	0.700659	1	0.995	4.76842e-77	Gm14135
6. Intermediate acinar 1	3.61736e-73	0.573144	0.819	0.624	6.42913e-69	Lpo
6. Intermediate acinar 1	3.63514e-66	0.625241	1	1	6.46074e-62	Scgb2b24
6. Intermediate acinar 1	2.50827e-62	0.737422	0.806	0.575	4.45795e-58	Hp
6. Intermediate acinar 1	4.39441e-58	0.459911	1	1	7.81018e-54	Esp6
6. Intermediate acinar 1	5.48401e-53	0.440097	1	1	9.74673e-49	Gm1553
6. Intermediate acinar 1	5.6007e-41	0.805979	0.715	0.605	9.95413e-37	Lipo1
6. Intermediate acinar 1	3.812e-40	0.525096	0.999	0.997	6.77507e-36	Scgb1b7
6. Intermediate acinar 1	3.81785e-40	0.635565	0.532	0.319	6.78546e-36	Pigr
6. Intermediate acinar 1	2.99043e-38	0.511752	0.999	0.999	5.3149e-34	Scgb1b20
6. Intermediate acinar 1	4.57204e-37	0.474916	0.924	0.832	8.12589e-33	Scgb1b24
6. Intermediate acinar 1	3.76557e-33	0.751095	0.672	0.564	6.69255e-29	Gm8978
6. Intermediate acinar 1	2.20676e-29	0.5858	0.506	0.327	3.92207e-25	Chst1
6. Intermediate acinar 1	5.32289e-26	1.39163	0.629	0.483	9.46037e-22	Phyh
6. Intermediate acinar 1	1.48735e-24	0.408355	0.99	0.989	2.64347e-20	Scgb2b7
6. Intermediate acinar 1	1.97145e-24	0.943357	0.708	0.569	3.50387e-20	Esp31
6. Intermediate acinar 1	7.33862e-23	0.56465	0.526	0.372	1.30429e-18	Gm43974
7. Intermediate acinar 2	2.62433e-114	1.08583	1	0.995	4.66423e-110	Gm14135
7. Intermediate acinar 2	1.47005e-98	0.91793	0.991	0.951	2.61273e-94	Sval2
7. Intermediate acinar 2	7.56191e-98	0.889803	1	1	1.34398e-93	Mucl2
7. Intermediate acinar 2	4.81081e-82	0.739488	1	1	8.55024e-78	Gm5938
7. Intermediate acinar 2	3.61982e-76	0.600011	1	1	6.4335e-72	Obp1a
7. Intermediate acinar 2	1.27623e-59	0.63509	1	1	2.26824e-55	Gm1553
7. Intermediate acinar 2	7.3381e-56	0.630389	0.998	0.996	1.3042e-51	Esp15
7. Intermediate acinar 2	1.14312e-51	0.708117	1	1	2.03167e-47	Scgb2b24
7. Intermediate acinar 2	6.49736e-47	0.660263	1	1	1.15478e-42	Scgb1b2
7. Intermediate acinar 2	2.79082e-42	0.64479	1	1	4.96012e-38	Scgb2b2
7. Intermediate acinar 2	8.6727e-41	0.475987	1	1	1.5414e-36	Pip
7. Intermediate acinar 2	3.62379e-39	0.804474	0.893	0.838	6.44056e-35	Scgb1b24
7. Intermediate acinar 2	6.12718e-35	1.89301	0.591	0.41	1.08898e-30	Obp1b
7. Intermediate acinar 2	6.46574e-33	0.968873	0.785	0.569	1.14916e-28	Esp31
7. Intermediate acinar 2	9.01809e-29	0.395978	1	1	1.60278e-24	Esp6
7. Intermediate acinar 2	5.28137e-25	1.8533	0.71	0.618	9.38657e-21	Gm14743
7. Intermediate acinar 2	1.81626e-20	0.897078	0.623	0.472	3.22805e-16	Scgb2a2
7. Intermediate acinar 2	3.54036e-19	0.573465	0.984	0.989	6.29228e-15	Scgb2b7
7. Intermediate acinar 2	5.33454e-19	0.542866	0.998	0.997	9.48108e-15	Scgb2b20
7. Intermediate acinar 2	1.57118e-18	0.439258	0.998	0.997	2.79246e-14	Scgb1b7
7. Intermediate acinar 2	8.42866e-18	0.424013	1	0.999	1.49803e-13	Scgb1b20
7. Intermediate acinar 2	1.04389e-17	1.11188	0.324	0.189	1.85531e-13	Pnliprp1
7. Intermediate acinar 2	7.54195e-16	0.872636	0.626	0.489	1.34043e-11	Phyh
7. Intermediate acinar 2	8.19537e-11	0.889601	0.381	0.279	1.45656e-06	Gm12886
7. Intermediate acinar 2	2.62509e-07	-0.324534	0.153	0.268	0.00466557	Tcn2
8. Tfrchi acinar	1.64409e-96	1.82437	1	0.984	2.92204e-92	Gm42418
8. Tfrchi acinar	8.06582e-90	1.94649	1	0.92	1.43354e-85	Malat1
8. Tfrchi acinar	2.54796e-60	1.15413	0.876	0.673	4.52848e-56	Scgb1b3
8. Tfrchi acinar	6.31024e-58	0.86125	1	0.996	1.12152e-53	Esp15
8. Tfrchi acinar	3.36299e-36	2.72752	0.401	0.182	5.97704e-32	Gm26917
8. Tfrchi acinar	2.82611e-35	0.869354	0.873	0.677	5.02285e-31	Esp16
8. Tfrchi acinar	3.74126e-20	1.45756	0.575	0.476	6.64935e-16	AY036118
8. Tfrchi acinar	2.18619e-15	0.804526	0.652	0.571	3.88552e-11	Gm8978
8. Tfrchi acinar	7.39475e-15	2.11999	0.276	0.154	1.31427e-10	Tfrc
8. Tfrchi acinar	7.4436e-15	1.45432	0.565	0.499	1.32295e-10	Neat1
8. Tfrchi acinar	2.0292e-13	2.01736	0.37	0.267	3.6065e-09	Nktr
8. Tfrchi acinar	2.16115e-13	2.21046	0.416	0.339	3.84101e-09	Luc7l2
8. Tfrchi acinar	1.78256e-12	1.95224	0.258	0.148	3.16815e-08	Tnrc6a
8. Tfrchi acinar	5.37991e-11	0.736777	0.649	0.614	9.56171e-07	Lipo1
8. Tfrchi acinar	1.17241e-08	2.0019	0.385	0.34	0.000208373	Srsf5
8. Tfrchi acinar	1.07374e-06	2.00873	0.307	0.257	0.0190836	Snrnp70
8. Tfrchi acinar	5.11378e-06	1.67931	0.339	0.305	0.0908872	Auts2
8. Tfrchi acinar	8.5577e-06	2.15717	0.283	0.235	0.152096	Tent5a
8. Tfrchi acinar	2.47488e-05	2.01482	0.261	0.214	0.439861	Etv1
8. Tfrchi acinar	6.75344e-05	0.769353	0.124	0.252	1	Akap9
8. Tfrchi acinar	0.00020201	1.59509	0.252	0.207	1	Kcnq1ot1
8. Tfrchi acinar	0.000296674	0.737583	0.183	0.332	1	Csnk1a1
8. Tfrchi acinar	0.000449492	0.828062	0.143	0.265	1	Ncor1
8. Tfrchi acinar	0.000656581	1.00779	0.155	0.284	1	Golgb1
8. Tfrchi acinar	0.00106375	0.899324	0.261	0.464	1	Hdlbp
9. Male acinar	1.26751e-173	1.27315	1	1	2.25274e-169	Gm1553
9. Male acinar	1.05628e-129	1.06861	0.898	0.27	1.87733e-125	Esp24
9. Male acinar	2.80947e-116	1.11951	0.994	0.578	4.99328e-112	Scgb2b12
9. Male acinar	7.28514e-92	1.17064	1	0.672	1.29479e-87	Esp16
9. Male acinar	4.2207e-79	0.845125	0.997	0.797	7.50144e-75	Gm12888
9. Male acinar	5.10892e-72	0.890615	1	0.741	9.08009e-68	Wfdc12
9. Male acinar	1.12185e-69	0.71536	1	0.931	1.99386e-65	Lcn11
9. Male acinar	1.15829e-69	0.783045	1	1	2.05862e-65	Scgb1b2
9. Male acinar	3.82635e-69	1.02437	1	0.997	6.80057e-65	Scgb1b7
9. Male acinar	4.82053e-69	0.705289	0.917	0.462	8.56753e-65	Scgb2a2
9. Male acinar	1.60516e-67	0.572335	1	0.855	2.85286e-63	Mup4
9. Male acinar	2.75388e-60	0.556196	1	1	4.89447e-56	Esp6
9. Male acinar	5.57955e-60	0.710112	1	0.996	9.91653e-56	Esp15
9. Male acinar	1.35091e-59	0.853669	1	0.668	2.40097e-55	Scgb1b3
9. Male acinar	1.54462e-58	0.518307	0.508	0.154	2.74525e-54	Scgb1b12
9. Male acinar	1.0098e-56	0.750204	0.997	0.834	1.79473e-52	Scgb1b24
9. Male acinar	1.29293e-56	0.970793	1	0.999	2.29793e-52	Scgb1b20
9. Male acinar	1.79036e-56	0.474552	1	1	3.18201e-52	Mucl2
9. Male acinar	4.64837e-56	0.769348	1	1	8.26156e-52	Scgb2b24
9. Male acinar	7.22372e-55	0.444261	0.601	0.201	1.28387e-50	Scgb2b17
9. Male acinar	7.48275e-53	0.940958	1	0.989	1.32991e-48	Scgb2b7
9. Male acinar	1.26147e-52	0.678705	1	0.788	2.24201e-48	9530002B09Rik
9. Male acinar	3.50494e-51	0.573006	0.93	0.416	6.22933e-47	Scgb2b3
9. Male acinar	5.05793e-48	0.590443	1	0.995	8.98946e-44	Gm14135
9. Male acinar	1.78937e-45	0.529706	0.856	0.366	3.18026e-41	Gm43974
10. Car6hi acinar	8.04596e-168	2.56617	0.652	0.082	1.43001e-163	Kcnn4
10. Car6hi acinar	3.73346e-124	6.43011	1	0.622	6.63547e-120	Car6
10. Car6hi acinar	4.23878e-111	2.26103	0.462	0.059	7.53358e-107	Gm44410
10. Car6hi acinar	1.4475e-107	3.71359	1	0.834	2.57264e-103	Dnase1
10. Car6hi acinar	3.08625e-84	2.8497	0.304	0.032	5.48519e-80	Scgb2b27
10. Car6hi acinar	2.23298e-54	2.98575	0.902	0.769	3.96868e-50	2310057J18Rik
10. Car6hi acinar	3.9297e-46	2.66924	0.832	0.564	6.98426e-42	Bglap3
10. Car6hi acinar	2.36513e-43	3.32756	0.929	0.859	4.20355e-39	Mup4
10. Car6hi acinar	7.33905e-39	1.10279	0.38	0.097	1.30437e-34	Folr1
10. Car6hi acinar	1.6365e-36	1.57784	1	1	2.90855e-32	Obp1a
10. Car6hi acinar	2.84879e-35	1.5003	0.522	0.208	5.06315e-31	Etv1
10. Car6hi acinar	2.29431e-34	1.32079	0.967	0.942	4.07768e-30	mt-Atp6
10. Car6hi acinar	5.63206e-32	1.22104	0.978	0.944	1.00099e-27	mt-Co3
10. Car6hi acinar	1.20258e-31	1.21583	0.967	0.928	2.13735e-27	mt-Co2
10. Car6hi acinar	2.87699e-28	1.35671	1	1	5.11327e-24	Gm5938
10. Car6hi acinar	3.21936e-27	1.07942	0.978	0.933	5.72177e-23	mt-Co1
10. Car6hi acinar	4.20641e-27	2.00208	0.658	0.418	7.47606e-23	Esp4
10. Car6hi acinar	6.98084e-27	1.14964	0.967	0.868	1.2407e-22	mt-Nd1
10. Car6hi acinar	1.78337e-26	1.17936	0.946	0.858	3.16959e-22	mt-Nd2
10. Car6hi acinar	2.9245e-25	1.03676	0.967	0.92	5.19772e-21	mt-Cytb
10. Car6hi acinar	4.01125e-23	1.44463	0.576	0.321	7.1292e-19	Lrrc26
10. Car6hi acinar	4.37009e-23	0.956287	0.962	0.893	7.76696e-19	mt-Nd4
10. Car6hi acinar	9.65796e-19	3.61991	0.397	0.182	1.71651e-14	Ggh
10. Car6hi acinar	7.99786e-18	1.00145	0.821	0.68	1.42146e-13	mt-Nd3
10. Car6hi acinar	2.17046e-16	1.04344	0.462	0.256	3.85756e-12	Tcn2
