# Supplementary material for: The First Transcriptomic Atlas of the Adult Lacrimal Gland Reveals Epithelial Complexity and Identifies Novel Progenitor Cells in Mice
Source: Cells. 2023 May 21;12(10):1435. doi: 10.3390/cells12101435 (PMC10216974; doi:10.3390/cells12101435)
Supplement: Supplementary file 1 [file cells-12-01435-s001.zip › Table S3 - DEG analysis between clusters.xlsx]

## Sheet: Acinar clusters 0 vs 1
Acinar clusters #0 vs #1							+ FC = upregulated in cluster 0
Gene symbol	p_val	avg_log2FC	pct.1	pct.2	p_val_adj		- FC = upregulated in cluster 1
mt-Co3	0	3.70539	1	0.988	0
mt-Atp6	0	3.62582	1	0.987	0
mt-Co2	0	3.51663	1	0.984	0
mt-Cytb	0	3.4758	1	0.98	0
mt-Nd2	0	3.20733	1	0.956	0
mt-Co1	0	3.11623	1	0.984	0
mt-Nd4	0	3.04436	1	0.963	0
mt-Nd1	0	2.92707	0.999	0.955	0
mt-Nd3	0	2.6485	0.96	0.819	0
Lpo	8.85253e-234	2.1742	0.925	0.994	1.57336e-229
mt-Nd4l	9.84434e-225	1.96424	0.867	0.699	1.74964e-220
Malat1	1.53615e-204	1.92655	0.97	0.872	2.73019e-200
mt-Nd5	1.82808e-255	1.88329	0.904	0.756	3.24904e-251
Qsox1	4.05763e-94	1.78949	0.742	0.878	7.21163e-90
Prom2	2.18329e-67	1.76579	0.665	0.718	3.88036e-63
Dnase1	2.17114e-186	1.66001	0.972	0.996	3.85876e-182
Eef2	1.34739e-146	1.49686	0.831	0.959	2.39471e-142
P4hb	2.74541e-134	1.46043	0.841	0.989	4.87941e-130
Hp	2.7462e-149	1.38914	0.891	0.994	4.88081e-145
Pigr	1.83514e-27	1.36028	0.607	0.829	3.26159e-23
Chst1	1.13985e-16	1.18996	0.567	0.821	2.02585e-12
Herpud1	5.28275e-49	1.17356	0.687	0.909	9.38903e-45
Trabd	4.73414e-16	1.17049	0.53	0.698	8.41399e-12
Slc27a2	8.74127e-07	1.13906	0.511	0.756	0.0155359
Bhlha15	2.66427e-06	1.08627	0.498	0.738	0.0473521
Gm42418	6.59986e-87	1.06198	0.978	0.985	1.17299e-82
Vcp	1.22185e-37	1.03872	0.612	0.746	2.1716e-33
Rpn2	3.91654e-29	1.01564	0.596	0.78	6.96086e-25
Hdlbp	6.47967e-24	1.01149	0.622	0.885	1.15163e-19
Gm8978	1.44744e-58	0.99025	0.823	0.874	2.57254e-54
Edem2	6.007e-05	0.986773	0.473	0.703	1
Saraf	8.57589e-15	0.968369	0.551	0.771	1.52419e-10
Txndc5	9.02592e-07	0.937033	0.47	0.654	0.0160418
Sec61a1	4.33876e-08	0.895507	0.478	0.647	0.000771128
Os9	0.000290193	0.862932	0.472	0.699	1
Tmed3	3.86343e-19	0.843109	0.649	0.963	6.86648e-15
Hspa5	1.69254e-60	0.841087	0.748	0.964	3.00815e-56
Tmed9	1.05869e-12	0.837829	0.565	0.844	1.88161e-08
Aqp5	2.28818e-12	0.83705	0.588	0.894	4.06679e-08
Slc38a10	4.95136e-07	0.829268	0.358	0.388	0.00880006
Dnajc3	6.20596e-26	0.828072	0.659	0.953	1.10299e-21
Fgg	0.0225686	0.824161	0.538	0.918	1
Edem3	0.000340011	0.809255	0.37	0.464	1
Man2a1	7.04543e-14	0.804859	0.475	0.55	1.25218e-09
Stard10	0.677564	0.803058	0.415	0.692	1
Cyp2b10	0.00565613	0.799335	0.354	0.623	1
Clptm1l	0.274957	0.79659	0.421	0.663	1
Rpn1	1.03313e-05	0.770815	0.476	0.685	0.183619
Mfge8	5.80222e-06	0.770009	0.484	0.697	0.103123
Gm26917	2.0552e-15	0.761384	0.289	0.195	3.65271e-11
2310057J18Rik	6.7209e-39	0.747484	0.891	0.876	1.19451e-34
Bckdha	0.188371	0.743265	0.354	0.492	1
P2rx4	0.00106736	0.743245	0.402	0.531	1
Edem1	0.157837	0.741707	0.395	0.582	1
Fmo5	6.42972e-05	0.726904	0.323	0.59	1
Gal3st2c	0.371909	0.724568	0.436	0.703	1
Bckdk	0.236531	0.714727	0.374	0.614	1
Furin	9.05767e-10	0.713646	0.4	0.44	1.60982e-05
Hid1	0.396215	0.713341	0.291	0.378	1
Bglap3	1.21671e-10	0.70497	0.746	0.871	2.16245e-06
Pabpc1	1.746e-16	0.698814	0.595	0.883	3.10317e-12
Srpr	0.239401	0.698772	0.464	0.774	1
Slc7a5	0.592164	0.693301	0.271	0.353	1
Etv1	0.0303825	0.691029	0.357	0.466	1
Cope	0.337589	0.684013	0.497	0.855	1
mt-Atp8	5.60255e-33	0.679488	0.401	0.264	9.95741e-29
Pim3	0.000520352	0.67686	0.405	0.532	1
Phgdh	0.181298	0.668905	0.386	0.56	1
Golgb1	0.0482065	0.667409	0.383	0.534	1
Lars2	1.27598e-52	0.666755	0.505	0.319	2.26779e-48
Npdc1	0.0471059	0.666147	0.408	0.589	1
Hsd17b4	0.669983	0.666136	0.367	0.583	1
Pycr2	0.197955	0.658598	0.308	0.473	1
Slc39a7	0.209573	0.658594	0.341	0.467	1
Bcat2	3.6391e-07	0.645862	0.342	0.669	0.00646777
Tfrc	0.00337382	0.639905	0.298	0.337	1
Atp11a	1.27792e-10	0.637414	0.429	0.488	2.27125e-06
Lman1	0.331705	0.63282	0.489	0.84	1
Aqp8	4.5221e-05	0.631693	0.255	0.447	0.803713
Tcf25	0.00309397	0.629677	0.45	0.656	1
Arfgef3	0.434847	0.628988	0.284	0.411	1
Lipo1	1.38567e-36	0.627334	0.843	0.933	2.46275e-32
Stt3b	0.542251	0.626172	0.34	0.515	1
Cdk5rap3	0.444032	0.625773	0.327	0.496	1
Tmem214	0.874643	0.624938	0.294	0.401	1
Mlph	0.462063	0.61785	0.308	0.416	1
Sel1l	0.124587	0.613522	0.34	0.453	1
Spint2	5.90667e-09	0.607746	0.583	0.912	0.000104979
Eif4g1	0.00455179	0.601092	0.385	0.51	1
Tex15	0.397557	0.599647	0.25	0.35	1
Rab3d	0.0101932	0.596959	0.306	0.51	1
5330417C22Rik	0.19292	0.591842	0.28	0.42	1
Etnk1	0.522449	0.587874	0.337	0.478	1
Slc35c2	0.0084638	0.580878	0.278	0.449	1
Atp9a	4.78481e-07	0.580284	0.28	0.253	0.00850405
Eif4ebp1	0.00939748	0.578053	0.458	0.867	1
Pex11g	1.43776e-12	0.576281	0.287	0.6	2.55532e-08
Aldh3a2	0.24153	0.575188	0.303	0.457	1
Grhpr	0.0130158	0.571669	0.271	0.433	1
Aldh3b2	0.000306438	0.563195	0.215	0.356	1
Tram1	0.23976	0.561888	0.53	0.934	1
Slc25a29	0.856481	0.561809	0.205	0.251	1
2023-03-02	0.498296	0.556893	0.465	0.81	1
Nans	2.72262e-10	0.556797	0.363	0.749	4.83892e-06
Gbf1	0.624511	0.552507	0.281	0.37	1
Sil1	0.260533	0.55036	0.277	0.409	1
Arhgdig	9.1908e-06	0.547662	0.214	0.373	0.163348
Tent5a	0.312441	0.547603	0.34	0.504	1
Pmvk	2.33083e-08	0.546926	0.245	0.464	0.000414259
Fgfbp1	3.03334e-08	0.545048	0.409	0.83	0.000539115
Pnliprp1	3.60592e-05	0.543445	0.127	0.206	0.64088
Gpt2	0.00259282	0.541089	0.206	0.326	1
Sel1l3	0.415063	0.536352	0.229	0.274	1
Nomo1	0.0819196	0.53442	0.228	0.25	1
Fkbp4	0.334184	0.533591	0.399	0.657	1
Krt8	2.25176e-09	0.529982	0.578	0.804	4.00206e-05
Slc25a10	0.152535	0.528347	0.243	0.35	1
Eif4g2	0.0155684	0.522267	0.525	0.846	1
Ero1lb	2.89157e-07	0.522034	0.282	0.536	0.00513918
Uggt1	0.733024	0.521479	0.253	0.324	1
Nupr1	3.96398e-26	0.520216	0.882	0.998	7.04517e-22
Zfp106	0.0384184	0.518788	0.314	0.5	1
Jund	7.35166e-25	0.518534	0.697	0.787	1.30661e-20
Srm	5.25267e-11	0.517618	0.288	0.588	9.33556e-07
Gmppb	6.42402e-09	0.516383	0.272	0.529	0.000114174
Pebp1	0.464025	0.513303	0.498	0.842	1
Aldh7a1	0.0906211	0.510215	0.323	0.512	1
Xbp1	0.292418	0.510111	0.447	0.806	1
Dpp3	0.00567019	0.509635	0.233	0.236	1
Snd1	0.0502409	0.508998	0.259	0.394	1
Asns	8.13154e-13	0.508045	0.276	0.574	1.44522e-08
Atp13a2	0.00741931	0.505405	0.249	0.261	1
Wfdc12	1.07137e-19	0.502218	0.904	0.932	1.90415e-15
Atp5b	1.47258e-05	0.501544	0.553	0.865	0.261722
Slc23a1	0.00793506	0.500318	0.241	0.378	1
Napa	1.26449e-07	0.487419	0.31	0.592	0.00224739
Nectin2	0.226184	0.4838	0.229	0.321	1
Sec23b	0.00945204	0.483343	0.25	0.396	1
Stk25	0.0637588	0.482884	0.241	0.357	1
Ppp1r37	0.56607	0.482015	0.229	0.307	1
Mlec	1.91466e-05	0.481055	0.331	0.615	0.340293
Zfhx3	0.450294	0.479214	0.334	0.455	1
Acox1	0.510076	0.478738	0.246	0.335	1
Abo	5.58318e-27	0.472823	0.283	0.698	9.92299e-23
Ubc	2.52612e-11	0.472564	0.632	0.777	4.48968e-07
Naxd	3.3393e-06	0.469011	0.317	0.592	0.0593494
Atp5a1	0.090673	0.465962	0.472	0.742	1
Preb	0.00171347	0.464983	0.241	0.39	1
Gcat	1.23634e-06	0.462709	0.213	0.385	0.0219735
Sdf2l1	4.62532e-12	0.459966	0.386	0.823	8.22058e-08
Tmbim6	0.00284727	0.456059	0.536	0.885	1
Atp5d	0.0620427	0.45353	0.54	0.908	1
Cpd	3.01357e-07	0.452514	0.387	0.433	0.00535602
Scd1	7.08511e-15	0.45153	0.296	0.633	1.25924e-10
Srprb	1.16979e-09	0.449588	0.233	0.453	2.07906e-05
H13	1.47007e-09	0.447801	0.397	0.823	2.61276e-05
Neat1	3.26393e-23	0.446347	0.518	0.485	5.80099e-19
Rrbp1	0.0581729	0.442576	0.51	0.822	1
Thop1	0.055937	0.439206	0.185	0.264	1
Mcfd2	8.84725e-13	0.436722	0.307	0.642	1.57242e-08
Auts2	0.0709782	0.43173	0.331	0.427	1
Tcn2	1.44855e-09	0.431613	0.313	0.629	2.5745e-05
Mia3	0.0223722	0.429999	0.306	0.499	1
Cracr2b	0.910959	0.429969	0.314	0.441	1
Psme4	0.573941	0.429547	0.226	0.301	1
Abcc2	0.51858	0.428104	0.164	0.208	1
Slc2a5	4.92443e-24	0.427891	0.214	0.526	8.75218e-20
Irak1	0.241539	0.427512	0.267	0.385	1
Asl	0.00410204	0.427184	0.241	0.384	1
Kif1b	0.0352939	0.42664	0.295	0.352	1
Atp2a2	3.23979e-05	0.425545	0.378	0.441	0.575808
Sort1	0.0447279	0.425296	0.214	0.314	1
Dtnb	0.653801	0.424811	0.186	0.217	1
Cldn3	0.0784349	0.423989	0.374	0.632	1
Scd2	5.1212e-07	0.419365	0.324	0.615	0.0091019
Gpr108	0.361905	0.418893	0.238	0.329	1
Btg2	3.90389e-17	0.417266	0.554	0.549	6.93839e-13
Luc7l2	1.46816e-12	0.417114	0.4	0.396	2.60936e-08
Fam174b	6.74353e-17	0.413572	0.204	0.458	1.19853e-12
Ssr2	2.48677e-07	0.41294	0.433	0.883	0.00441974
Akap9	0.0424121	0.41165	0.287	0.448	1
Snrnp70	1.58408e-14	0.41159	0.335	0.273	2.81539e-10
Pam	0.042378	0.411354	0.321	0.522	1
Srp68	0.000207802	0.409763	0.216	0.36	1
Gorasp2	8.7386e-10	0.408354	0.283	0.56	1.55311e-05
Rpl13	4.17277e-40	0.406833	0.937	0.999	7.41626e-36
Arglu1	0.0330389	0.402703	0.312	0.379	1
Nudt22	1.50167e-24	0.401499	0.21	0.521	2.66893e-20
Epha5	0.273066	0.399775	0.236	0.277	1
Eif3b	0.803014	0.397575	0.257	0.346	1
Uba5	1.24768e-16	0.396834	0.29	0.642	2.2175e-12
Arfgap3	1.01617e-11	0.396761	0.246	0.501	1.80604e-07
Exosc5	9.11167e-06	0.396431	0.214	0.374	0.161942
Derl3	2.29209e-30	0.393831	0.28	0.712	4.07372e-26
Taldo1	0.00383266	0.392053	0.571	0.902	1
Rabl6	0.0202906	0.390541	0.228	0.345	1
Pde4d	0.458996	0.389567	0.186	0.21	1
Tor2a	1.02363e-08	0.389194	0.232	0.442	0.000181931
Kcnk1	4.29159e-10	0.387908	0.22	0.433	7.62745e-06
Bok	0.0324173	0.386734	0.147	0.211	1
Arpc1a	1.87838e-08	0.385979	0.263	0.502	0.000333844
Cyb561	0.000548644	0.385048	0.204	0.33	1
Idh2	1.12489e-08	0.383358	0.263	0.504	0.000199926
Ly6f	7.45493e-09	0.380549	0.361	0.645	0.000132496
Ctsd	2.45004e-07	0.380183	0.507	0.679	0.00435446
Hectd1	0.530522	0.380026	0.284	0.403	1
Pomgnt1	0.425834	0.380001	0.176	0.226	1
Uso1	4.30888e-11	0.379597	0.248	0.499	7.65817e-07
Sod2	1.73598e-07	0.376099	0.345	0.668	0.00308536
Arfip2	0.000113468	0.374902	0.196	0.326	1
Ttc39c	0.00133272	0.374539	0.15	0.235	1
Copb2	3.87447e-07	0.373761	0.293	0.541	0.0068861
Clcn3	0.890047	0.372418	0.236	0.306	1
Dcaf4	1.07549e-09	0.371881	0.192	0.376	1.91147e-05
Jtb	3.49534e-22	0.371445	0.302	0.71	6.21226e-18
Chid1	2.66807e-11	0.370358	0.207	0.417	4.74196e-07
Jun	1.90903e-16	0.368541	0.693	0.666	3.39292e-12
Ehf	0.584515	0.368434	0.388	0.622	1
Ivd	0.0154942	0.367224	0.202	0.302	1
Reep5	0.020604	0.365112	0.515	0.945	1
Trpc4ap	0.0122705	0.365007	0.222	0.225	1
Fdps	1.10891e-19	0.365004	0.237	0.544	1.97086e-15
Pgp	7.88068e-09	0.363723	0.266	0.511	0.000140063
Qars	0.0758281	0.363607	0.212	0.305	1
Sec31a	0.0184104	0.363259	0.259	0.401	1
Nbas	0.135635	0.360907	0.181	0.248	1
Lman2	1.05094e-06	0.353377	0.28	0.509	0.0186783
B4galnt1	6.25102e-11	0.353151	0.206	0.409	1.11099e-06
Tmem38a	4.2276e-23	0.352351	0.194	0.474	7.51371e-19
Tmem234	1.30342e-11	0.34977	0.395	0.832	2.31656e-07
Abhd17a	4.57704e-05	0.347883	0.241	0.416	0.813477
Clstn1	0.0089188	0.347154	0.301	0.346	1
Copa	0.121872	0.346275	0.264	0.39	1
Bmyc	4.15829e-15	0.342372	0.353	0.782	7.39053e-11
Mib1	0.232881	0.341917	0.226	0.259	1
Cd82	2.70979e-12	0.341168	0.292	0.6	4.81611e-08
Lrrc26	1.20451e-13	0.340863	0.363	0.784	2.14078e-09
Aass	1.97552e-07	0.340102	0.151	0.279	0.0035111
Papss2	7.10368e-12	0.336242	0.178	0.367	1.26254e-07
Vmp1	5.6513e-12	0.336142	0.267	0.543	1.00441e-07
Ndufv1	8.29208e-07	0.335599	0.25	0.454	0.0147375
Nktr	0.0368174	0.335363	0.309	0.372	1
Coq9	2.18815e-06	0.3347	0.171	0.304	0.03889
Plet1	1.25951e-13	0.334574	0.394	0.862	2.23853e-09
9130230L23Rik	2.67454e-27	0.334262	0.191	0.495	4.75346e-23
Gadd45g	0.886584	0.332879	0.473	0.676	1
Gps1	0.000661984	0.332814	0.216	0.35	1
Ptprf	0.0242551	0.33167	0.222	0.23	1
Gnb2	0.00305172	0.330524	0.408	0.732	1
Mydgf	7.54467e-23	0.326632	0.334	0.785	1.34091e-18
Ubfd1	8.16831e-16	0.326238	0.203	0.446	1.45175e-11
Tubb4b	2.14046e-16	0.325917	0.283	0.613	3.80424e-12
Cenpb	0.000315541	0.324171	0.236	0.389	1
Gfpt1	0.000680219	0.322904	0.22	0.354	1
AY036118	5.29389e-12	0.322075	0.428	0.367	9.40883e-08
Spcs1	8.12079e-161	-0.325992	0.185	0.888	1.44331e-156
Rpl36a	7.36406e-113	-0.327934	0.302	0.917	1.30881e-108
Rpl10a	8.03515e-55	-0.336049	0.609	0.989	1.42809e-50
Gpx4	1.69738e-100	-0.33803	0.316	0.917	3.01676e-96
Cox8a	7.18867e-99	-0.340587	0.34	0.934	1.27764e-94
Cox6b1	5.55561e-188	-0.342917	0.141	0.853	9.87399e-184
Esp18	9.93336e-65	-0.343644	0.994	1	1.76546e-60
Atp5g1	3.95931e-115	-0.347267	0.288	0.95	7.03689e-111
Gm12886	3.67098e-73	-0.354494	0.177	0.611	6.52443e-69
Atp5h	1.52488e-165	-0.361936	0.194	0.877	2.71018e-161
Gm10076	3.80252e-139	-0.3664	0.229	0.899	6.75821e-135
Prdx1	4.1755e-113	-0.373065	0.342	0.937	7.42111e-109
Cox7a2	3.32744e-166	-0.377796	0.19	0.897	5.91386e-162
Gng5	2.54286e-120	-0.378323	0.295	0.927	4.51942e-116
Cox7c	5.43324e-145	-0.379001	0.245	0.947	9.6565e-141
Atp5g2	7.32572e-168	-0.379198	0.175	0.859	1.302e-163
Rpl11	1.69392e-67	-0.381334	0.737	0.996	3.01061e-63
Uqcrq	2.58599e-149	-0.384154	0.224	0.933	4.59607e-145
Rps15	1.08444e-63	-0.386185	0.577	0.986	1.92738e-59
Calm1	1.3871e-85	-0.3884	0.419	0.956	2.4653e-81
Rpl31	2.32529e-167	-0.390103	0.192	0.856	4.13273e-163
Pfdn5	1.08467e-131	-0.39314	0.276	0.925	1.92779e-127
Gm12888	1.07696e-55	-0.396211	0.934	0.999	1.91408e-51
Esp4	3.32152e-124	-0.401897	0.274	0.944	5.90334e-120
Atp5l	3.03025e-158	-0.408973	0.214	0.894	5.38566e-154
Fxyd3	7.73301e-123	-0.411394	0.317	0.942	1.37439e-118
Rpl18a	1.17484e-75	-0.416379	0.744	0.998	2.08804e-71
Eif1	7.87555e-75	-0.424208	0.536	0.973	1.39972e-70
Cox4i1	2.15475e-105	-0.427916	0.384	0.964	3.82965e-101
Actb	1.61127e-137	-0.433267	0.524	0.885	2.86371e-133
Sval2	3.31215e-70	-0.435343	0.992	1	5.88669e-66
Scgb2a2	1.42705e-35	-0.452864	0.452	0.873	2.53629e-31
Dynll1	1.3652e-168	-0.458855	0.225	0.921	2.42637e-164
Ftl1	1.59343e-152	-0.459916	0.48	0.915	2.832e-148
Btf3	1.22716e-176	-0.467775	0.208	0.911	2.18103e-172
Rps17	4.53702e-132	-0.469569	0.314	0.94	8.06364e-128
Rpl27a	5.29853e-92	-0.470661	0.756	0.999	9.41707e-88
Rps13	3.78984e-90	-0.485983	0.672	0.999	6.73568e-86
Serf2	3.35659e-95	-0.500548	0.573	0.995	5.96567e-91
Eef1b2	2.11142e-127	-0.50151	0.354	0.964	3.75263e-123
Rpl23a	1.25616e-139	-0.503165	0.3	0.909	2.23257e-135
Atp5e	2.08884e-193	-0.504127	0.179	0.908	3.71249e-189
Naca	9.28928e-103	-0.504214	0.464	0.99	1.65098e-98
Rpl29	1.41594e-105	-0.505205	0.455	0.98	2.51656e-101
Obp1b	1.34815e-08	-0.509157	0.267	0.385	0.000239607
Rpl5	4.68265e-99	-0.51198	0.443	0.975	8.32247e-95
Ptma	7.38125e-158	-0.518212	0.338	0.925	1.31187e-153
Esp16	3.32464e-63	-0.534201	0.84	0.844	5.90888e-59
Esp24	8.69969e-23	-0.543122	0.348	0.604	1.5462e-18
Gabarap	1.50012e-151	-0.547861	0.28	0.952	2.66616e-147
Rpl24	1.71791e-112	-0.563321	0.562	0.993	3.05324e-108
Rpl21	4.32763e-110	-0.566109	0.643	0.995	7.6915e-106
Rpl22	1.44032e-160	-0.570281	0.337	0.963	2.55989e-156
Sec61b	2.40119e-109	-0.576295	0.498	0.997	4.26764e-105
Ppia	2.61984e-176	-0.576556	0.346	0.958	4.65625e-172
Rps27l	3.62737e-122	-0.583944	0.386	0.991	6.44693e-118
Rpl10	1.64035e-115	-0.604166	0.592	0.996	2.9154e-111
Rpl13a	4.25663e-126	-0.604858	0.529	0.985	7.56531e-122
Rpl38	2.82423e-133	-0.608315	0.487	0.994	5.0195e-129
Rplp2	5.99321e-161	-0.612263	0.421	0.987	1.06517e-156
Rpl37	8.38332e-121	-0.618752	0.62	0.996	1.48997e-116
Rps3	1.50219e-128	-0.620571	0.584	0.991	2.66984e-124
Nme2	4.60062e-127	-0.621867	0.509	0.992	8.17668e-123
Rpl22l1	9.25145e-141	-0.626602	0.35	0.985	1.64426e-136
Sec61g	2.19585e-163	-0.633532	0.288	0.975	3.90268e-159
Rps21	9.64059e-143	-0.635012	0.624	0.997	1.71342e-138
Rpl7	1.17635e-129	-0.635603	0.546	0.995	2.09073e-125
Rpl28	8.80153e-140	-0.635721	0.673	0.997	1.5643e-135
Gm14743	0.00736782	-0.646775	0.501	0.666	1
Esp15	1.06443e-132	-0.647313	0.999	1	1.89181e-128
Rps18	6.58415e-141	-0.656295	0.693	0.997	1.1702e-136
Rps25	5.72989e-138	-0.657348	0.506	0.995	1.01837e-133
Rpl6	8.1358e-139	-0.664656	0.599	0.996	1.44598e-134
Rps23	7.33481e-146	-0.680929	0.62	0.996	1.30362e-141
Rpl27	7.91396e-165	-0.700725	0.42	0.983	1.40655e-160
Rplp1	6.92252e-149	-0.701819	0.863	1	1.23034e-144
Rps27	1.69019e-224	-0.702471	0.275	0.962	3.00398e-220
Rpl35	4.78422e-188	-0.70807	0.315	0.98	8.50299e-184
Rpl30	6.72742e-158	-0.709549	0.673	0.999	1.19566e-153
Gm1553	1.20479e-200	-0.716098	1	1	2.14127e-196
Rps26	1.05589e-157	-0.717034	0.469	0.99	1.87663e-153
Rps9	2.14876e-173	-0.717497	0.625	0.996	3.81899e-169
Rpl12	2.80653e-143	-0.723229	0.539	0.99	4.98804e-139
Rps19	8.60541e-187	-0.731085	0.5	0.988	1.52944e-182
Rps3a1	8.31057e-162	-0.731206	0.709	0.999	1.47704e-157
Rps28	6.65114e-209	-0.731455	0.325	0.978	1.18211e-204
Rpl36	7.42956e-177	-0.734143	0.437	0.988	1.32046e-172
Rpl23	3.56282e-163	-0.739428	0.765	0.999	6.3322e-159
Rps5	7.77615e-182	-0.754595	0.555	0.996	1.38205e-177
Rpl37a	1.50404e-173	-0.766788	0.67	0.997	2.67313e-169
Rpl41	2.34182e-176	-0.772873	0.74	0.999	4.16212e-172
Rps8	1.27907e-187	-0.780937	0.835	0.999	2.27329e-183
Rps20	5.96207e-187	-0.788872	0.684	0.997	1.05964e-182
Rpl9	9.64663e-181	-0.798433	0.578	0.994	1.71449e-176
Rpl35a	7.4984e-199	-0.809148	0.605	0.993	1.33269e-194
Rpl15	6.6961e-179	-0.811561	0.556	1	1.1901e-174
Rps4x	1.0686e-190	-0.817346	0.726	0.998	1.89921e-186
Rps10	1.56925e-194	-0.819901	0.658	0.998	2.78902e-190
Rpl17	8.97621e-186	-0.838567	0.586	0.994	1.59534e-181
Rps29	3.96838e-207	-0.855715	0.703	0.998	7.05301e-203
Gm14135	1.37029e-185	-0.867091	1	1	2.43541e-181
Rpl34	1.52226e-213	-0.869252	0.522	0.996	2.70552e-209
Fau	2.30569e-211	-0.874573	0.699	0.996	4.0979e-207
Rps7	4.90966e-201	-0.89409	0.615	1	8.72595e-197
Rpl26	2.50213e-211	-0.913973	0.586	0.995	4.44704e-207
Rps16	9.80156e-234	-0.93447	0.592	0.997	1.74203e-229
Rps11	9.56517e-244	-0.968823	0.476	0.994	1.70002e-239
Rpl39	1.87009e-255	-0.973546	0.415	0.988	3.32372e-251
Rpl19	4.41037e-235	-0.977604	0.626	0.997	7.83856e-231
Tpt1	4.57789e-241	-0.995087	0.862	1	8.13628e-237
Tmsb4x	0	-1.01357	0.444	0.975	0
Rps12	1.94742e-233	-1.0281	0.604	0.999	3.46116e-229
Rpl32	1.52074e-244	-1.04707	0.739	1	2.70281e-240
Fth1	0	-1.05602	0.549	0.99	0
Rps14	9.49396e-240	-1.06812	0.656	1	1.68736e-235
Rps15a	5.66374e-260	-1.075	0.475	0.999	1.00662e-255
Rps27a	5.03979e-260	-1.11599	0.661	0.999	8.95722e-256
Rps24	1.56001e-282	-1.21606	0.755	0.999	2.7726e-278

## Sheet: Male ac 9 vs male ac 0-1
Male acinar cluster #9 vs male acinar clusters #0-1							+ FC = upregulated in male cluster 9
Gene symbol	p_val	avg_log2FC	pct.1	pct.2	p_val_adj		- FC = upregulated in male clusters 0,1
Gm42418	3.7596e-108	1.53151	0.997	0.978	6.68193e-104
Car6	1.50996e-68	1.12344	0.738	0.51	2.68365e-64
Rplp1	5.81387e-61	0.745883	0.987	0.927	1.0333e-56
Rps10	3.07925e-45	0.731414	0.946	0.819	5.47274e-41
Rpl32	4.66869e-56	0.730826	1	0.858	8.29766e-52
Obp1b	1.87496e-17	0.730259	0.342	0.155	3.33237e-13
Rpl37a	7.81186e-43	0.667902	0.942	0.812	1.3884e-38
Rps12	5.2712e-36	0.662033	0.914	0.772	9.3685e-32
Rps24	6.22715e-42	0.632927	1	0.865	1.10675e-37
Rps18	4.8505e-38	0.630298	0.927	0.832	8.6208e-34
Rps27a	3.47593e-37	0.625591	0.962	0.81	6.17777e-33
Rpl26	4.18221e-35	0.623516	0.917	0.772	7.43305e-31
Fau	3.51541e-40	0.621272	0.942	0.839	6.24793e-36
Rpl35a	4.48796e-33	0.616123	0.911	0.776	7.97645e-29
Rpl17	1.98402e-29	0.610588	0.891	0.765	3.52619e-25
Rpl19	5.99793e-33	0.608302	0.93	0.791	1.06601e-28
Esp31	1.09623e-32	0.604422	0.911	0.681	1.94833e-28
Rps19	4.13989e-24	0.595755	0.796	0.71	7.35783e-20
Rps3a1	2.93619e-35	0.594754	0.955	0.838	5.21848e-31
Rps14	9.32493e-28	0.592949	0.958	0.807	1.65732e-23
Rps29	7.15545e-35	0.587418	0.942	0.831	1.27174e-30
Scgb2a2	3.98672e-48	0.583017	0.917	0.606	7.0856e-44
Rpl34	1.62218e-27	0.57554	0.879	0.732	2.8831e-23
Rpl36	1.08061e-25	0.564092	0.796	0.677	1.92056e-21
Tmsb4x	6.07311e-25	0.563321	0.767	0.676	1.07937e-20
Gm1553	8.99552e-126	0.562744	1	1	1.59877e-121
Rps7	4.87878e-27	0.559722	0.93	0.788	8.67106e-23
Rps23	8.18963e-27	0.55752	0.882	0.782	1.45554e-22
Rps5	6.17606e-28	0.557123	0.856	0.753	1.09767e-23
Rps27	2.18937e-20	0.555456	0.661	0.583	3.89117e-16
Rps15a	4.96913e-29	0.551114	0.882	0.705	8.83164e-25
Tpt1	3.26273e-35	0.544241	0.984	0.922	5.79885e-31
Rpl12	4.08241e-20	0.525007	0.821	0.723	7.25567e-16
Fth1	2.9052e-20	0.52009	0.796	0.745	5.16341e-16
Rps20	7.56041e-29	0.518977	0.942	0.824	1.34371e-24
Rpl24	2.56963e-20	0.498739	0.856	0.757	4.567e-16
Rpl7	8.68948e-22	0.49294	0.875	0.746	1.54438e-17
Rps28	5.61223e-17	0.490482	0.671	0.603	9.97461e-13
Rpl21	4.35339e-23	0.488831	0.901	0.813	7.73728e-19
Rpl9	1.05545e-22	0.47719	0.885	0.764	1.87586e-18
Rps16	1.77735e-21	0.467489	0.891	0.776	3.15889e-17
Rps13	4.44273e-23	0.462187	0.92	0.823	7.89607e-19
Rpl41	1.8125e-23	0.461109	0.965	0.864	3.22135e-19
Sec61b	3.46594e-19	0.459424	0.927	0.722	6.16002e-15
Eef1b2	1.26636e-15	0.457827	0.696	0.616	2.2507e-11
Gm14743	2.83399e-43	0.455792	0.815	0.475	5.03686e-39
Rpl30	7.57763e-23	0.453101	0.917	0.823	1.34677e-18
Rpl6	1.19467e-19	0.449112	0.891	0.776	2.12329e-15
Rpl23	1.21015e-23	0.448428	0.974	0.876	2.15079e-19
Rps8	3.97471e-23	0.440821	0.99	0.914	7.06424e-19
Gpx4	1.00049e-12	0.439515	0.652	0.619	1.77817e-08
Rpl28	1.08706e-18	0.439449	0.901	0.828	1.93203e-14
Nme2	8.78722e-15	0.433842	0.872	0.73	1.56175e-10
Rpl27	1.50286e-14	0.428027	0.732	0.662	2.67103e-10
Rpl15	1.9318e-17	0.426665	0.872	0.75	3.4334e-13
Rps3	1.75338e-16	0.423471	0.853	0.772	3.11628e-12
Rpl22	3.31627e-12	0.421399	0.62	0.6	5.89401e-08
Rps26	1.87755e-10	0.420603	0.764	0.698	3.33697e-06
Rps11	3.09974e-14	0.418705	0.808	0.71	5.50917e-10
Rpl35	1.14054e-10	0.410518	0.681	0.616	2.02709e-06
Rps9	9.30739e-14	0.408122	0.815	0.787	1.6542e-09
Rpl38	1.71047e-10	0.387125	0.751	0.707	3.04002e-06
Ftl1	2.26052e-06	0.382215	0.546	0.68	0.0401763
Rpl39	4.58971e-12	0.379502	0.77	0.671	8.15729e-08
Atp5e	7.86056e-07	0.369293	0.511	0.51	0.0139706
Uqcrh	5.27393e-06	0.369116	0.482	0.522	0.0937335
AY036118	0.210294	0.363953	0.224	0.328	1
Rplp2	2.68271e-07	0.355271	0.639	0.664	0.00476798
Rpl18a	3.92495e-11	0.355018	0.882	0.871	6.97581e-07
Rps4x	3.53936e-14	0.346668	0.962	0.855	6.29051e-10
Rpl27a	3.79564e-10	0.34192	0.895	0.874	6.74599e-06
Fkbp2	0.00582129	0.337967	0.422	0.472	1
Rpl11	1.45189e-13	0.335638	0.895	0.869	2.58045e-09
Naca	2.11981e-09	0.331044	0.764	0.699	3.76754e-05
Cox4i1	1.40535e-08	0.329654	0.655	0.647	0.000249772
Wfdc18	8.76995e-53	0.328297	0.744	0.575	1.55868e-48
Rps21	4.17338e-10	0.322242	0.837	0.794	7.41735e-06
Naxd	9.25392e-17	-0.323984	0.16	0.446	1.6447e-12
Hsp90ab1	4.9783e-11	-0.324407	0.62	0.866	8.84793e-07
Hectd1	1.03565e-23	-0.328947	0.042	0.33	1.84066e-19
Napa	1.32481e-16	-0.329821	0.163	0.448	2.35458e-12
Eif4ebp1	6.16101e-07	-0.330596	0.422	0.668	0.01095
Gbf1	9.82787e-18	-0.331479	0.077	0.326	1.74671e-13
Nectin2	8.61836e-14	-0.332374	0.067	0.267	1.53174e-09
Sort1	7.98212e-17	-0.332623	0.026	0.234	1.41866e-12
Xbp1	4.83982e-21	-0.337656	0.224	0.588	8.60182e-17
Pebp1	4.85106e-15	-0.341784	0.332	0.673	8.6218e-11
Gmppb	8.23863e-15	-0.34206	0.144	0.399	1.46425e-10
Eif4g2	4.41531e-15	-0.343841	0.355	0.697	7.84734e-11
Tcn2	9.00652e-20	-0.345057	0.147	0.457	1.60073e-15
Ppp1r37	1.38553e-16	-0.34743	0.048	0.267	2.4625e-12
Preb	3.10134e-17	-0.34794	0.067	0.306	5.512e-13
Cpd	6.58622e-26	-0.349799	0.07	0.392	1.17057e-21
Slc25a10	3.33006e-14	-0.35032	0.08	0.291	5.91851e-10
Akap9	1.67289e-25	-0.351929	0.045	0.353	2.97323e-21
Mia3	5.55205e-23	-0.356267	0.073	0.373	9.86766e-19
Copb2	2.79825e-25	-0.356442	0.083	0.414	4.97332e-21
Pmvk	1.50975e-14	-0.357008	0.147	0.402	2.68328e-10
Aldh3b2	2.89501e-12	-0.365144	0.102	0.303	5.14529e-08
Nans	6.78361e-14	-0.365378	0.262	0.563	1.20565e-09
Scd1	1.02341e-12	-0.366277	0.24	0.508	1.81891e-08
Slc35c2	8.20328e-16	-0.367902	0.105	0.35	1.45797e-11
Snd1	6.64343e-18	-0.368979	0.067	0.313	1.18074e-13
Arfgap3	1.30252e-23	-0.369237	0.064	0.365	2.31497e-19
Atp2a2	3.5787e-30	-0.370323	0.051	0.404	6.36042e-26
Sel1l3	5.31662e-19	-0.370378	0.016	0.239	9.44923e-15
Srprb	1.15465e-19	-0.373598	0.067	0.332	2.05216e-15
Atp5a1	3.53653e-29	-0.377634	0.182	0.602	6.28547e-25
Scd2	5.74885e-25	-0.379205	0.105	0.445	1.02174e-20
Tfrc	1.00398e-22	-0.379476	0.042	0.319	1.78437e-18
Aldh7a1	5.64779e-19	-0.379522	0.128	0.413	1.00378e-14
Btg2	8.62165e-43	-0.380037	0.096	0.579	1.53233e-38
Atp5b	9.46534e-17	-0.380368	0.351	0.704	1.68228e-12
Sec23b	1.03915e-20	-0.381997	0.048	0.31	1.84688e-16
Phgdh	1.02075e-18	-0.383745	0.157	0.458	1.81417e-14
Auts2	3.54018e-32	-0.38687	0.019	0.364	6.29197e-28
Uggt1	3.25167e-17	-0.387417	0.051	0.277	5.77919e-13
Atp13a2	1.89301e-18	-0.392017	0.022	0.243	3.36445e-14
Nomo1	5.98247e-16	-0.392046	0.026	0.223	1.06326e-11
Sil1	8.61176e-18	-0.392892	0.086	0.337	1.53057e-13
Zfp106	1.58655e-22	-0.393435	0.093	0.398	2.81978e-18
Ero1lb	6.35199e-21	-0.393441	0.086	0.374	1.12894e-16
Acox1	9.39599e-22	-0.395321	0.042	0.309	1.66995e-17
Slc25a29	9.19343e-14	-0.396841	0.048	0.236	1.63395e-09
Stk25	1.92451e-21	-0.398496	0.032	0.29	3.42044e-17
Jun	8.52236e-44	-0.39851	0.188	0.721	1.51468e-39
Neat1	1.65475e-51	-0.399639	0.019	0.507	2.94098e-47
Tex15	4.35377e-20	-0.404493	0.035	0.282	7.73795e-16
Arhgdig	2.03742e-15	-0.405708	0.073	0.295	3.62111e-11
Scgb2b3	3.30023e-07	-0.40624	0.93	0.871	0.0058655
Tent5a	4.70059e-23	-0.407718	0.134	0.469	8.35437e-19
Cdk5rap3	2.21584e-17	-0.408099	0.137	0.409	3.93821e-13
Aqp8	8.20131e-14	-0.415182	0.112	0.335	1.45762e-09
Tmbim6	1.27478e-23	-0.417416	0.288	0.693	2.26567e-19
Aldh3a2	6.03319e-21	-0.421612	0.105	0.4	1.07228e-16
Gpt2	2.56537e-19	-0.426761	0.029	0.264	4.55944e-15
Mlph	1.8486e-22	-0.427979	0.061	0.346	3.28552e-18
Furin	1.12353e-26	-0.43097	0.064	0.389	1.99684e-22
Slc23a1	9.15902e-23	-0.431955	0.038	0.313	1.62783e-18
Zfhx3	2.8201e-29	-0.432901	0.054	0.396	5.01216e-25
Mlec	2.1388e-27	-0.439544	0.096	0.447	3.8013e-23
Spint2	1.67466e-16	-0.441288	0.403	0.744	2.97638e-12
Etnk1	1.35411e-27	-0.442112	0.058	0.389	2.40665e-23
Atp9a	4.58073e-21	-0.44257	0.029	0.279	8.14134e-17
Slc39a7	9.25769e-23	-0.444095	0.089	0.391	1.64537e-18
Sdf2l1	9.36582e-19	-0.44429	0.246	0.583	1.66459e-14
Grhpr	2.35653e-20	-0.444393	0.077	0.351	4.18826e-16
Tmem214	5.31607e-20	-0.445374	0.067	0.331	9.44825e-16
Slc7a5	8.33871e-16	-0.447804	0.064	0.282	1.48204e-11
Srm	5e-24	-0.452854	0.102	0.429	8.88649e-20
Sel1l	5.66412e-25	-0.453748	0.07	0.382	1.00668e-20
Calr	9.98758e-16	-0.454524	0.556	0.821	1.77509e-11
mt-Atp8	1.87064e-27	-0.455338	0.013	0.313	3.32469e-23
Hsd17b4	1.12502e-20	-0.459456	0.153	0.465	1.99949e-16
Pim3	1.4133e-26	-0.46551	0.109	0.456	2.51185e-22
5330417C22Rik	1.40912e-23	-0.466849	0.032	0.309	2.50443e-19
Eif4g1	6.96225e-31	-0.474053	0.077	0.442	1.2374e-26
Jund	3.32066e-38	-0.474329	0.275	0.786	5.90181e-34
Tcf25	5.87496e-33	-0.476256	0.137	0.554	1.04416e-28
Atp11a	2.92388e-34	-0.479934	0.064	0.454	5.19662e-30
Rab3d	1.2056e-26	-0.484333	0.07	0.399	2.14271e-22
Etv1	3.13536e-29	-0.488208	0.07	0.422	5.57247e-25
Hid1	5.45505e-21	-0.490917	0.061	0.331	9.69526e-17
Arfgef3	1.19765e-26	-0.495144	0.042	0.353	2.12858e-22
Bckdha	1.59008e-21	-0.515236	0.115	0.415	2.82604e-17
Pycr2	5.16151e-24	-0.516402	0.073	0.38	9.17355e-20
P2rx4	6.40038e-29	-0.520503	0.109	0.472	1.13754e-24
Pex11g	1.03111e-25	-0.520824	0.099	0.436	1.83259e-21
Golgb1	1.29125e-29	-0.521275	0.102	0.47	2.29494e-25
Npdc1	1.27565e-32	-0.522069	0.102	0.498	2.2672e-28
Stt3b	2.78411e-29	-0.540505	0.083	0.437	4.9482e-25
Gal3st2c	3.11535e-31	-0.543439	0.16	0.568	5.53692e-27
Bcat2	2.67768e-27	-0.543788	0.141	0.513	4.75904e-23
Fmo5	8.53385e-21	-0.547183	0.208	0.547	1.51672e-16
Stard10	6.53579e-23	-0.547293	0.208	0.562	1.16161e-18
Edem1	2.77798e-31	-0.554448	0.099	0.479	4.9373e-27
Fgg	1.87994e-10	-0.55715	0.47	0.724	3.34121e-06
Clptm1l	8.79971e-26	-0.560262	0.169	0.533	1.56397e-21
Cope	4.98416e-19	-0.562135	0.339	0.68	8.85834e-15
Fgfbp1	1.06878e-22	-0.574939	0.256	0.621	1.89955e-18
Edem3	2.38309e-28	-0.582601	0.061	0.395	4.23547e-24
Bckdk	1.20391e-27	-0.587091	0.128	0.489	2.13971e-23
Pabpc1	6.41005e-32	-0.58849	0.278	0.721	1.13926e-27
Rrbp1	6.04549e-44	-0.590931	0.16	0.65	1.07447e-39
Slc38a10	8.17643e-26	-0.604517	0.061	0.372	1.4532e-21
Tram1	4.26347e-25	-0.618189	0.342	0.719	7.57747e-21
Lman1	2.58341e-28	-0.625643	0.246	0.649	4.59149e-24
Tmed3	4.16934e-17	-0.648238	0.53	0.815	7.41016e-13
Malat1	6.35594e-95	-0.661586	0.403	0.962	1.12964e-90
Lipo1	2.39694e-37	-0.663994	0.978	0.968	4.26008e-33
Man2a1	2.22298e-41	-0.665022	0.086	0.53	3.95091e-37
Cyp2b10	9.88549e-29	-0.665484	0.153	0.538	1.75695e-24
Mfge8	3.00827e-40	-0.66757	0.121	0.573	5.3466e-36
Tmed9	1.82423e-28	-0.668913	0.291	0.702	3.2422e-24
Aqp5	4.87678e-22	-0.673974	0.387	0.747	8.6675e-18
Os9	6.13609e-32	-0.685782	0.169	0.577	1.09057e-27
Rpn1	6.35342e-42	-0.686724	0.112	0.571	1.12919e-37
Sec61a1	2.34889e-35	-0.688651	0.141	0.558	4.17468e-31
Srpr	3.35933e-39	-0.704055	0.15	0.607	5.97054e-35
Txndc5	2.85253e-32	-0.729439	0.147	0.544	5.06979e-28
Chst1	4.38512e-23	-0.735896	0.304	0.675	7.79368e-19
Saraf	1.45456e-33	-0.745131	0.23	0.662	2.58519e-29
Herpud1	8.73984e-22	-0.748926	0.495	0.826	1.55333e-17
Dnajc3	1.67665e-26	-0.768155	0.466	0.81	2.9799e-22
Edem2	1.24495e-35	-0.77151	0.15	0.578	2.21264e-31
Rpn2	2.76969e-44	-0.812219	0.188	0.683	4.92257e-40
Vcp	1.50483e-49	-0.839603	0.179	0.702	2.67454e-45
Bhlha15	3.48434e-35	-0.846847	0.201	0.64	6.19271e-31
Hdlbp	1.12315e-35	-0.872117	0.332	0.773	1.99618e-31
Hspa5	2.26237e-48	-0.910533	0.425	0.869	4.02091e-44
Gm8978	5.00807e-45	-0.931419	0.962	0.975	8.90084e-41
Trabd	7.22497e-46	-0.932313	0.134	0.622	1.28409e-41
Slc27a2	8.91144e-44	-1.0756	0.252	0.737	1.58383e-39
Hp	2.09727e-32	-1.17039	0.818	0.961	3.72748e-28
Pigr	7.66799e-51	-1.18463	0.188	0.705	1.36283e-46
Eef2	1.19816e-47	-1.23679	0.54	0.925	2.12948e-43
P4hb	3.47158e-46	-1.29386	0.633	0.93	6.17004e-42
Dnase1	7.69821e-25	-1.36054	0.981	0.987	1.3682e-20
Prom2	3.38624e-59	-1.40762	0.185	0.741	6.01836e-55
Qsox1	2.62165e-54	-1.46742	0.316	0.839	4.65946e-50
mt-Nd5	1.17816e-121	-1.714	0.042	0.853	2.09394e-117
mt-Nd4l	3.0766e-115	-1.81959	0.038	0.828	5.46804e-111
Lpo	8.44493e-89	-2.06078	0.859	0.991	1.50092e-84
mt-Nd3	2.43875e-140	-2.63464	0.058	0.925	4.33438e-136
mt-Nd1	6.28169e-160	-3.46934	0.109	0.988	1.11645e-155
mt-Nd2	3.34061e-158	-3.74555	0.125	0.99	5.93727e-154
mt-Nd4	1.04218e-160	-3.83926	0.176	0.995	1.85227e-156
mt-Co1	1.99567e-162	-4.26501	0.374	0.997	3.54691e-158
mt-Co2	5.15905e-163	-4.67444	0.319	0.999	9.16918e-159
mt-Atp6	6.77638e-164	-4.99488	0.39	0.996	1.20437e-159
mt-Co3	3.13532e-162	-5.0112	0.46	0.997	5.5724e-158
mt-Cytb	3.71566e-169	-5.13056	0.262	0.997	6.60385e-165

## Sheet: Ductal 3 vs 5
Male acinar cluster #9 vs male acinar clusters #0-1							+ FC = upregulated in cluster 3
Gene symbol	p_val	avg_log2FC	pct.1	pct.2	p_val_adj		- FC = upregulated in cluster 5
Atf3	8.33795e-204	3.11663	0.964	0.259	1.4819e-199
Gadd45b	2.55856e-136	2.77113	0.813	0.24	4.54734e-132
Mt1	1.72058e-114	2.56512	0.898	0.567	3.05799e-110
Zfp36	1.28819e-146	2.37958	0.906	0.401	2.2895e-142
Cxcl1	2.12873e-54	2.30083	0.358	0.039	3.7834e-50
Dnajb1	8.36016e-87	2.28883	0.732	0.314	1.48585e-82
Gadd45g	6.8178e-89	2.17093	0.75	0.291	1.21173e-84
Fos	2.36949e-167	2.12219	0.987	0.688	4.21129e-163
Egr1	7.34805e-149	2.04845	0.957	0.56	1.30597e-144
Ier2	3.34446e-100	1.97737	0.827	0.441	5.94411e-96
Cebpd	2.93576e-91	1.89824	0.853	0.459	5.21773e-87
Nfkbia	1.27941e-58	1.82234	0.597	0.234	2.2739e-54
Junb	6.69506e-133	1.80762	0.958	0.654	1.18991e-128
Socs3	8.40423e-69	1.79814	0.596	0.175	1.49368e-64
Ccn1	5.52808e-67	1.77423	0.715	0.343	9.82505e-63
Mt2	1.78915e-58	1.74432	0.651	0.288	3.17986e-54
Btg2	1.23737e-123	1.74336	0.943	0.668	2.19919e-119
Nr4a1	1.99486e-60	1.73723	0.517	0.13	3.54546e-56
Ier3	5.04353e-86	1.70559	0.817	0.396	8.96386e-82
Klf6	1.72089e-97	1.70276	0.87	0.476	3.05854e-93
Fosb	1.39132e-91	1.62027	0.874	0.566	2.47279e-87
Nfkbiz	5.05887e-57	1.55946	0.563	0.196	8.99113e-53
Dusp1	7.62084e-66	1.51661	0.799	0.481	1.35445e-61
Sdc4	1.62603e-64	1.4963	0.84	0.606	2.88994e-60
Jun	7.00925e-144	1.41357	0.994	0.887	1.24575e-139
Errfi1	2.51907e-46	1.40847	0.639	0.312	4.47714e-42
Actg1	2.38087e-125	1.39778	0.973	0.843	4.23152e-121
Ifrd1	4.47849e-33	1.34356	0.363	0.106	7.95962e-29
Ubc	9.30533e-89	1.33811	0.925	0.648	1.65384e-84
Thbs1	3.04598e-21	1.30897	0.21	0.047	5.41362e-17
Irf1	9.15847e-36	1.29619	0.353	0.09	1.62774e-31
Jund	5.2554e-87	1.26555	0.921	0.687	9.34042e-83
Gm20186	3.62461e-22	1.17885	0.339	0.135	6.44202e-18
Icam1	3.01847e-31	1.09117	0.508	0.228	5.36473e-27
Sfn	1.643e-23	1.06931	0.625	0.418	2.92011e-19
Bhlhe40	4.18317e-37	1.05674	0.643	0.357	7.43475e-33
Phlda1	2.5463e-30	1.03769	0.743	0.534	4.52553e-26
Csrp1	1.22275e-31	1.02807	0.616	0.354	2.17319e-27
Gadd45a	5.68383e-21	1.01588	0.292	0.103	1.01019e-16
Pim1	4.01159e-30	1.01521	0.301	0.073	7.1298e-26
Timp3	2.90305e-21	1.00396	0.693	0.57	5.15958e-17
Actb	5.76884e-74	0.976498	0.983	0.879	1.0253e-69
Hcar2	1.87477e-20	0.97576	0.235	0.065	3.33202e-16
Pnrc1	4.25236e-27	0.943752	0.614	0.396	7.55772e-23
Map3k8	7.44887e-30	0.922308	0.224	0.028	1.32389e-25
Zfp36l1	1.86994e-23	0.898832	0.745	0.59	3.32345e-19
Odc1	2.4369e-16	0.898246	0.272	0.108	4.33111e-12
Adamts1	9.97437e-10	0.835335	0.309	0.182	1.77275e-05
Neat1	9.47102e-27	0.830628	0.793	0.619	1.68328e-22
Klf9	8.7927e-21	0.829617	0.375	0.163	1.56273e-16
Sbno2	8.6262e-22	0.819791	0.365	0.146	1.53314e-17
Sat1	1.34763e-09	0.798056	0.469	0.342	2.39514e-05
Tgif1	2.18156e-19	0.778033	0.292	0.108	3.87729e-15
Ccnl1	5.30242e-15	0.755062	0.408	0.23	9.424e-11
H3f3b	2.10268e-44	0.750214	0.983	0.938	3.73708e-40
Tsc22d1	4.45292e-24	0.742882	0.818	0.657	7.91417e-20
Cldn4	4.40907e-13	0.740015	0.318	0.161	7.83623e-09
Lcn2	3.15207e-13	0.733478	0.549	0.377	5.60218e-09
Slc25a25	2.07914e-22	0.732067	0.203	0.037	3.69525e-18
Tcim	5.89372e-13	0.716472	0.258	0.117	1.04749e-08
Fabp5	9.20724e-07	0.711522	0.216	0.123	0.016364
Tpm1	1.99736e-10	0.682717	0.563	0.447	3.54991e-06
mt-Nd5	5.9257e-22	0.663909	0.79	0.64	1.05317e-17
Vcl	1.45567e-12	0.659605	0.235	0.099	2.58716e-08
Ppp1r15a	5.2576e-15	0.654367	0.362	0.189	9.34433e-11
Cebpb	9.91245e-13	0.65363	0.474	0.312	1.76174e-08
Cfl1	4.04803e-16	0.64797	0.546	0.359	7.19456e-12
Iffo2	1.36443e-13	0.646792	0.217	0.081	2.42499e-09
F3	8.31927e-07	0.646635	0.499	0.397	0.0147858
Cish	2.8377e-18	0.642941	0.221	0.061	5.04344e-14
Plscr1	1.0878e-12	0.632658	0.23	0.095	1.93334e-08
Smoc2	3.6698e-13	0.583928	0.584	0.41	6.52233e-09
Vcan	1.6368e-10	0.583869	0.273	0.138	2.90908e-06
Rnd3	2.36866e-10	0.580102	0.356	0.21	4.20982e-06
Rassf1	2.04014e-12	0.550452	0.231	0.094	3.62594e-08
Zfp36l2	9.53708e-09	0.540782	0.473	0.335	0.000169503
Apoe	1.79815e-19	0.539843	0.912	0.819	3.19586e-15
Ythdc1	5.45512e-08	0.528764	0.413	0.287	0.000969539
Mcl1	1.79335e-11	0.513881	0.468	0.305	3.18731e-07
Arid5b	6.45171e-10	0.480785	0.447	0.29	1.14666e-05
Atf4	1.71762e-08	0.478037	0.372	0.241	0.000305273
Irf2bpl	3.31059e-08	0.47529	0.358	0.226	0.000588391
Cxadr	1.81172e-07	0.468333	0.26	0.15	0.00321996
Hsp90aa1	2.94544e-07	0.468024	0.701	0.589	0.00523493
Ddx5	4.90792e-15	0.460306	0.809	0.687	8.72285e-11
Skil	6.63554e-07	0.453708	0.29	0.178	0.0117933
Dstn	7.7292e-09	0.451373	0.657	0.543	0.000137371
Sik1	2.98154e-09	0.447764	0.3	0.168	5.29909e-05
Scgb1b3	5.73944e-05	0.435166	0.421	0.327	1
Klf4	7.6054e-05	0.433944	0.325	0.234	1
Eif1a	7.28534e-07	0.431413	0.255	0.153	0.0129482
Tra2b	5.19111e-07	0.426087	0.433	0.314	0.00922617
mt-Atp8	1.06225e-06	0.423344	0.311	0.203	0.0188793
Itga6	7.80702e-05	0.421196	0.51	0.426	1
Clk1	3.38767e-08	0.418685	0.375	0.243	0.000602091
Jmjd1c	1.43307e-05	0.4171	0.433	0.334	0.2547
Stat3	4.20815e-07	0.416886	0.302	0.19	0.00747914
Hspa8	1.32777e-09	0.411717	0.747	0.65	2.35984e-05
Lmna	5.08522e-07	0.410492	0.362	0.239	0.00903796
Sgk1	0.000365203	0.408171	0.295	0.215	1
Glul	2.31137e-06	0.404814	0.316	0.208	0.04108
Iqgap1	3.71017e-07	0.396017	0.471	0.352	0.00659409
Esp16	7.69153e-06	0.395555	0.443	0.331	0.136702
Arrdc3	2.70626e-05	0.392224	0.329	0.23	0.480983
Spag9	0.000179496	0.39068	0.25	0.172	1
Scgb2b7	0.000104501	0.38888	0.98	0.968	1
Krt17	1.04139e-06	0.386552	0.849	0.764	0.0185086
Fst	0.0124894	0.386366	0.267	0.214	1
Mup4	2.02709e-06	0.380406	0.696	0.6	0.0360274
Ank	1.60106e-05	0.378696	0.314	0.212	0.284557
Sox4	0.000208614	0.37312	0.423	0.331	1
Osr2	6.34673e-06	0.372474	0.446	0.334	0.1128
Azin1	8.19859e-07	0.37179	0.266	0.157	0.0145714
Map1lc3b	4.92035e-05	0.369752	0.471	0.377	0.874493
Tpm3	1.89093e-05	0.368317	0.281	0.185	0.336075
Plpp3	7.64827e-07	0.36782	0.555	0.436	0.0135933
Scgb1b7	1.32032e-05	0.362949	0.994	0.993	0.23466
Tsc22d2	4.24112e-07	0.360921	0.215	0.113	0.00753774
Scgb2b20	1.06653e-06	0.360056	0.995	0.997	0.0189554
Ets2	0.000128442	0.359298	0.291	0.207	1
Picalm	1.46564e-06	0.359061	0.319	0.206	0.0260487
Cald1	6.97273e-07	0.354672	0.21	0.114	0.0123926
Sqstm1	1.64768e-05	0.353711	0.263	0.168	0.292843
Wfdc12	2.84654e-06	0.351533	0.531	0.406	0.0505916
Mapre1	3.81138e-06	0.346381	0.24	0.142	0.0677397
Dusp6	0.000124837	0.340294	0.208	0.134	1
Hspb1	0.00260841	0.329327	0.63	0.596	1
Ube2h	5.50001e-05	0.32456	0.224	0.138	0.977516
Cox7a2	0.000182637	-0.322067	0.526	0.574	1
AY036118	0.000131496	-0.322248	0.607	0.661	1
Atrx	5.99287e-05	-0.322426	0.299	0.379	1
Zfp706	0.000452816	-0.322468	0.198	0.265	1
Gsta4	0.000228765	-0.322759	0.253	0.321	1
Uqcrh	1.78647e-06	-0.324885	0.673	0.73	0.0317509
Cox5a	0.000485001	-0.325344	0.39	0.458	1
Atp1b3	3.63335e-05	-0.325647	0.551	0.614	0.645755
Mrpl23	0.000324661	-0.326409	0.262	0.331	1
Six1	0.00082856	-0.32776	0.273	0.339	1
Asph	0.000187306	-0.327805	0.243	0.316	1
Mrpl33	6.12508e-06	-0.332589	0.141	0.223	0.108861
Phlda3	0.000986821	-0.333314	0.348	0.404	1
Cpd	0.000812138	-0.335028	0.404	0.451	1
Rps20	6.92861e-17	-0.336818	0.956	0.95	1.23142e-12
Rps19	1.81726e-16	-0.337367	0.949	0.946	3.22982e-12
Ndufa2	2.16103e-05	-0.338584	0.418	0.505	0.38408
Ndufa8	0.000216036	-0.338732	0.199	0.265	1
Rpl32	2.33041e-20	-0.340391	0.972	0.964	4.14184e-16
Pebp1	0.000232848	-0.342454	0.461	0.523	1
Xrcc5	0.000241786	-0.342905	0.144	0.207	1
Adam28	0.00085364	-0.344158	0.168	0.228	1
Cdo1	3.35585e-05	-0.346348	0.47	0.557	0.596435
Lamtor4	0.000122047	-0.347132	0.241	0.319	1
Atp5j	2.88548e-05	-0.347435	0.527	0.589	0.512836
Rpl14	2.23846e-13	-0.3478	0.882	0.905	3.97842e-09
St6galnac2	0.000182933	-0.34893	0.154	0.222	1
Rpl36	3.12907e-12	-0.349194	0.9	0.91	5.5613e-08
Jag2	0.00106109	-0.349453	0.252	0.312	1
Micos13	0.000234079	-0.350918	0.394	0.461	1
Pkp4	1.98094e-05	-0.355202	0.174	0.254	0.352073
Nrip1	0.000573724	-0.355258	0.238	0.301	1
Sf3b6	0.00057112	-0.357659	0.339	0.408	1
Ndufa7	6.09095e-05	-0.359652	0.395	0.476	1
Anpep	0.0031257	-0.363041	0.273	0.32	1
Uqcc2	3.49436e-05	-0.363966	0.28	0.359	0.621052
Ndufs7	1.75205e-05	-0.364014	0.313	0.401	0.311391
Sult5a1	6.29951e-05	-0.364841	0.243	0.32	1
Cox7b	6.63084e-06	-0.365	0.485	0.553	0.11785
Ly6d	0.01325	-0.369246	0.529	0.554	1
Tfcp2l1	6.85492e-08	-0.371286	0.648	0.72	0.00121832
Atp5g1	1.7653e-06	-0.373893	0.445	0.541	0.0313748
Col17a1	2.36462e-05	-0.374506	0.499	0.563	0.420265
Rpl35	2.48874e-08	-0.376032	0.705	0.764	0.000442323
S100a11	2.74167e-13	-0.376942	0.811	0.868	4.87277e-09
Trim2	0.002024	-0.381294	0.166	0.221	1
Mif	4.21786e-09	-0.382604	0.709	0.777	7.49641e-05
Crisp1	6.2495e-07	-0.383525	0.588	0.687	0.0111072
Fbln1	2.50577e-06	-0.384268	0.14	0.228	0.0445351
Ogt	1.84376e-05	-0.39033	0.178	0.258	0.327691
Ikzf2	8.27553e-05	-0.392472	0.166	0.237	1
Uqcr10	4.45656e-08	-0.393082	0.457	0.567	0.000792065
Cat	0.000615404	-0.396205	0.225	0.288	1
Slc38a2	0.000130587	-0.39883	0.372	0.446	1
Atpif1	3.70871e-09	-0.401019	0.667	0.727	6.59149e-05
Prdx1	5.9539e-10	-0.416398	0.604	0.706	1.05819e-05
Fxyd3	2.33448e-17	-0.420743	0.859	0.906	4.14908e-13
Gm42418	3.09006e-25	-0.424754	0.997	0.996	5.49196e-21
Atp5mpl	9.68306e-05	-0.424839	0.304	0.375	1
Capg	9.02857e-07	-0.43071	0.357	0.454	0.0160465
Psmb3	1.3225e-07	-0.43424	0.32	0.423	0.00235047
Gm34455	2.1045e-06	-0.435129	0.165	0.258	0.0374033
Sorbs2	5.84893e-06	-0.438293	0.226	0.317	0.103953
Pbx1	1.17557e-05	-0.439579	0.423	0.503	0.208935
Tmem258	2.03813e-05	-0.442557	0.248	0.328	0.362237
4632427E13Rik	3.65645e-06	-0.448797	0.136	0.221	0.0649861
mt-Cytb	2.96438e-32	-0.451117	0.976	0.99	5.2686e-28
Anxa8	1.81705e-06	-0.471652	0.236	0.334	0.0322945
mt-Nd3	1.60951e-11	-0.480445	0.565	0.677	2.86059e-07
Nt5e	3.38592e-05	-0.490307	0.151	0.222	0.60178
mt-Nd1	2.79858e-26	-0.494682	0.892	0.937	4.97391e-22
Slc16a11	2.51533e-08	-0.514687	0.166	0.277	0.00044705
Xist	1.57416e-10	-0.519761	0.564	0.657	2.79776e-06
Atp1a1	3.6576e-16	-0.529299	0.723	0.804	6.50065e-12
Dapl1	3.26367e-10	-0.547689	0.549	0.657	5.80052e-06
Cyp2f2	8.33471e-16	-0.549109	0.534	0.721	1.48133e-11
Tpi1	7.78188e-09	-0.551035	0.304	0.423	0.000138307
Gpha2	1.0729e-06	-0.560351	0.358	0.461	0.0190687
mt-Co3	1.22381e-61	-0.570963	0.995	0.994	2.17508e-57
Ly6a	3.92482e-09	-0.572565	0.384	0.503	6.97559e-05
mt-Nd2	3.57348e-29	-0.59098	0.863	0.903	6.35114e-25
S100a6	3.14428e-34	-0.59632	0.91	0.952	5.58834e-30
Kcnq1ot1	1.81787e-09	-0.617701	0.216	0.338	3.23091e-05
mt-Atp6	6.91503e-69	-0.653052	0.987	0.997	1.22901e-64
Wfdc2	4.17747e-24	-0.671907	0.72	0.834	7.42461e-20
mt-Co2	5.14654e-72	-0.697227	0.975	0.992	9.14695e-68
Fxyd2	1.94859e-14	-0.764859	0.216	0.377	3.46323e-10
Gm49708	6.0183e-14	-0.834092	0.113	0.251	1.06963e-09
Wfdc18	1.13594e-34	-1.02452	0.846	0.937	2.0189e-30
