# Supplementary material for: The First Transcriptomic Atlas of the Adult Lacrimal Gland Reveals Epithelial Complexity and Identifies Novel Progenitor Cells in Mice
Source: Cells. 2023 May 21;12(10):1435. doi: 10.3390/cells12101435 (PMC10216974; doi:10.3390/cells12101435)
Supplement: Supplementary file 1 [file cells-12-01435-s001.zip › Table S4 - DEG in Aldh1a1-pos cells of the Ltf epithelial cluster.xlsx]

## Sheet: Adlh1a1-pos in Ltf+ epith
Aldh1a1+ vs Aldh1a1- cells in the Ltf+ epithelial cluster (#4)
Gene	p_val	avg_log2FC	pct.1	pct.2	p_val_adj		genes with FC > 1.5 ; p-adj < 0.05
Aldh1a1	9.43115e-165	2.27106	1	0	1.6762e-160
Sult1d1	4.18534e-15	1.68939	0.458	0.101	7.4386e-11
Fcgbp	5.09295e-15	1.30485	0.915	0.435	9.0517e-11
Cyp4a12b	1.97953e-24	1.29841	0.644	0.121	3.51823e-20
Cbr2	2.72613e-13	1.1735	0.898	0.396	4.84515e-09
Acsl1	5.30604e-13	1.13178	0.729	0.29	9.43043e-09
A2ml1	6.97005e-08	1.12881	0.593	0.262	0.00123879
Car2	6.7876e-25	1.08388	0.458	0.056	1.20636e-20
Slc12a2	7.04772e-12	1.0382	0.864	0.395	1.25259e-07
Krt7	5.09141e-12	0.982019	0.729	0.275	9.04897e-08
Cyp2f2	2.58773e-14	0.967454	1	0.906	4.59917e-10
St8sia6	2.93963e-19	0.963104	0.542	0.104	5.2246e-15
Gm14743	0.00024442	0.959178	0.661	0.444	1
Gsta4	6.71723e-11	0.94198	0.644	0.22	1.19385e-06
Wfdc3	8.15024e-23	0.919449	0.356	0.035	1.44854e-18
Fmo1	2.53942e-12	0.914669	0.627	0.197	4.5133e-08
Clic6	5.98237e-18	0.871203	0.475	0.087	1.06325e-13
Sox9	7.63569e-10	0.860267	0.763	0.355	1.35709e-05
Tspan8	1.45858e-18	0.858386	0.542	0.105	2.59233e-14
Fut9	2.10489e-14	0.82065	0.61	0.168	3.74102e-10
Atp1b3	3.4642e-10	0.819732	0.847	0.409	6.15692e-06
Slc9a3r1	2.90924e-13	0.818197	0.576	0.162	5.17059e-09
Dmbt1	1.03087e-08	0.817978	0.932	0.527	0.000183216
F5	3.31969e-09	0.801139	0.864	0.454	5.90008e-05
Ezr	6.86546e-09	0.800254	0.78	0.386	0.00012202
Fxyd2	1.42169e-08	0.772845	0.441	0.139	0.000252677
Gpx2	3.39159e-11	0.761781	0.814	0.303	6.02787e-07
Cp	9.68979e-11	0.761488	0.424	0.11	1.72217e-06
Tst	3.81683e-08	0.752839	0.847	0.445	0.000678365
Cxcl17	3.59098e-08	0.741514	0.881	0.494	0.000638225
Slc5a8	5.87366e-12	0.736621	0.61	0.189	1.04393e-07
Zc3hav1	2.88475e-17	0.733961	0.373	0.055	5.12707e-13
Psme2	2.17851e-09	0.729853	0.644	0.233	3.87186e-05
Tfcp2l1	1.267e-08	0.716398	0.814	0.413	0.000225184
Ide	3.83543e-12	0.714107	0.627	0.199	6.81671e-08
Add3	8.42082e-12	0.704027	0.627	0.198	1.49663e-07
Adipor1	1.90053e-15	0.703698	0.576	0.14	3.37781e-11
Slc16a11	4.79988e-11	0.703226	0.559	0.171	8.53083e-07
Ano1	2.09181e-11	0.702488	0.593	0.184	3.71778e-07
Tspan1	8.34855e-18	0.694809	0.39	0.058	1.48379e-13
Acadm	2.63407e-10	0.693829	0.695	0.249	4.68154e-06
Oip5os1	1.43248e-13	0.69053	0.458	0.104	2.54594e-09
Arpc2	1.48919e-13	0.690361	0.644	0.184	2.64674e-09
Gpi1	1.34503e-11	0.683027	0.542	0.156	2.39052e-07
Alox12	6.00863e-11	0.681632	0.475	0.129	1.06791e-06
Prdx3	5.09823e-10	0.675246	0.508	0.158	9.06109e-06
Atp6v1b1	4.08429e-15	0.669477	0.322	0.048	7.25901e-11
Gstm1	1.1035e-06	0.662696	0.949	0.656	0.0196126
Ltf	1.94972e-07	0.662143	0.983	0.831	0.00346523
P4ha2	6.55132e-15	0.660708	0.407	0.077	1.16437e-10
Mylk	4.8483e-14	0.66031	0.508	0.121	8.61688e-10
Akap9	4.27629e-09	0.654656	0.593	0.217	7.60025e-05
Ildr1	8.58196e-10	0.652122	0.525	0.166	1.52527e-05
Ociad2	6.84358e-17	0.649686	0.373	0.056	1.21631e-12
Pam	1.42487e-07	0.647938	0.746	0.36	0.00253242
Lratd1	3.61565e-13	0.646188	0.458	0.105	6.42609e-09
Fam189a2	6.10136e-28	0.6429	0.424	0.039	1.08439e-23
Mtdh	6.05014e-14	0.642118	0.593	0.158	1.07529e-09
Cd14	2.61526e-14	0.631629	0.475	0.103	4.64811e-10
Nfia	9.99342e-11	0.630876	0.61	0.195	1.77613e-06
Fdx1	1.3846e-07	0.627277	0.559	0.214	0.00246085
Slc15a2	6.72506e-09	0.624393	0.712	0.29	0.000119524
Fth1	1.46221e-07	0.623308	1	0.939	0.00259878
Igfbp5	8.07813e-14	0.622686	0.492	0.111	1.43573e-09
Cyb5a	2.19285e-06	0.61505	0.949	0.775	0.0389735
Pdxdc1	1.35691e-11	0.613363	0.542	0.155	2.41164e-07
Gm49708	1.4039e-09	0.6095	0.356	0.088	2.49515e-05
Nfib	2.23002e-06	0.608453	0.797	0.431	0.0396342
Tox4	2.52861e-11	0.606296	0.373	0.084	4.4941e-07
S100a1	1.56434e-07	0.605675	0.746	0.342	0.00278031
Cyp2a5	5.88809e-06	0.605213	0.847	0.507	0.104649
Ogdh	3.09075e-13	0.599982	0.475	0.113	5.49319e-09
Cpd	6.5921e-08	0.599088	0.78	0.355	0.00117161
Aox3	4.63366e-07	0.598593	0.814	0.445	0.00823541
Atp6v0e	3.32551e-07	0.597621	0.847	0.412	0.00591044
Golga4	6.18478e-09	0.58987	0.508	0.169	0.000109922
Cryab	8.40597e-06	0.588554	0.983	0.886	0.149399
Higd1a	8.61148e-11	0.587187	0.61	0.194	1.53052e-06
Tpst2	1.37459e-14	0.586636	0.322	0.049	2.44305e-10
Mgst1	1.49923e-10	0.585236	0.627	0.207	2.66457e-06
Nrg2	3.12682e-17	0.582714	0.339	0.045	5.55729e-13
Clmn	2.12115e-11	0.582153	0.61	0.188	3.76991e-07
Alas1	5.16085e-07	0.581091	0.847	0.445	0.00917238
Tnrc6b	3.8645e-11	0.579566	0.407	0.1	6.86838e-07
Atp6v1a	3.46864e-11	0.578476	0.61	0.194	6.16481e-07
Cldn8	6.09714e-12	0.577363	0.61	0.188	1.08364e-07
1700123O20Rik	2.71986e-12	0.577283	0.424	0.095	4.83401e-08
Dsp	2.53903e-06	0.577022	0.644	0.303	0.0451262
Syncrip	5.43785e-10	0.576325	0.373	0.092	9.66469e-06
Nectin3	1.83313e-16	0.575114	0.271	0.029	3.25802e-12
Snrpf	2.85625e-12	0.572663	0.542	0.146	5.07641e-08
Gusb	6.70288e-09	0.572415	0.542	0.185	0.00011913
Sqstm1	1.08075e-12	0.570997	0.576	0.156	1.92082e-08
Sar1b	1.32628e-10	0.568427	0.644	0.218	2.3572e-06
Tomm20	5.00999e-09	0.568382	0.627	0.225	8.90426e-05
Klhdc8a	3.76471e-16	0.566834	0.39	0.064	6.69103e-12
Naa80	3.45e-13	0.565096	0.305	0.049	6.13168e-09
Pllp	8.42081e-12	0.564468	0.356	0.074	1.49663e-07
Ipo13	1.41416e-15	0.560802	0.254	0.027	2.51339e-11
Pafah1b1	3.89894e-10	0.560147	0.576	0.185	6.92958e-06
Chchd2	3.12418e-06	0.558239	0.915	0.738	0.055526
Gpx1	1.68266e-06	0.558178	0.847	0.506	0.029906
Golgb1	4.77616e-07	0.54907	0.525	0.215	0.00848866
Fgfr1op2	3.10036e-09	0.547761	0.424	0.123	5.51027e-05
Cox5a	3.36971e-06	0.547409	0.847	0.448	0.0598899
Wfdc2	4.30436e-08	0.546891	0.627	0.247	0.000765014
Hipk1	8.97861e-09	0.543622	0.559	0.198	0.000159577
Rex1bd	4.55728e-09	0.543004	0.661	0.247	8.09966e-05
Gsn	1.10291e-09	0.538746	0.695	0.277	1.9602e-05
Tmbim4	2.85083e-07	0.538647	0.627	0.253	0.00506677
Snu13	1.91089e-08	0.532739	0.593	0.223	0.000339623
H2afv	2.68626e-07	0.525521	0.492	0.185	0.00477428
Gm20186	9.39934e-10	0.52517	0.22	0.036	1.67054e-05
Sorl1	1.07127e-08	0.524298	0.593	0.214	0.000190396
Rab5a	9.45108e-11	0.523926	0.458	0.123	1.67974e-06
Rad23b	2.50832e-09	0.523204	0.407	0.111	4.45804e-05
Ppp4r3b	2.16973e-10	0.520776	0.373	0.091	3.85626e-06
Metap2	1.59081e-05	0.520428	0.407	0.168	0.282734
Pgrmc1	6.74209e-07	0.519553	0.78	0.347	0.0119827
Paics	9.27108e-09	0.518085	0.424	0.124	0.000164775
Hacd2	2.63647e-13	0.517377	0.458	0.101	4.6858e-09
Atp11a	1.79451e-05	0.516726	0.746	0.444	0.318938
Ccser2	1.24108e-10	0.516407	0.492	0.139	2.20578e-06
Sod2	2.74045e-06	0.515586	0.729	0.347	0.048706
Lima1	1.03752e-06	0.514557	0.593	0.246	0.0184398
Camk1	3.04544e-12	0.513956	0.356	0.071	5.41267e-08
Flii	8.93879e-12	0.509878	0.356	0.074	1.58869e-07
Osgin2	9.22857e-14	0.509589	0.305	0.046	1.64019e-09
Tspan33	7.04482e-17	0.508526	0.492	0.094	1.25208e-12
Mal	9.30024e-11	0.508514	0.22	0.032	1.65293e-06
Grcc10	3.46541e-07	0.504895	0.644	0.269	0.00615907
Akr1b3	4.3628e-08	0.504598	0.678	0.269	0.0007754
Atp6v1d	5.40287e-08	0.504051	0.593	0.22	0.000960252
Nxn	1.5407e-12	0.502753	0.39	0.081	2.73828e-08
Snx10	5.50831e-14	0.502653	0.441	0.091	9.78992e-10
Scaf11	3.1807e-09	0.501985	0.475	0.146	5.65306e-05
Hnrnpm	1.70758e-10	0.500974	0.475	0.13	3.03489e-06
Rnf167	6.38209e-13	0.499273	0.322	0.055	1.13429e-08
Gsto1	1.06943e-07	0.498474	0.458	0.16	0.00190069
Hnrnpab	1.93892e-09	0.49846	0.678	0.241	3.44605e-05
Skp1a	7.24753e-09	0.496843	0.661	0.249	0.00012881
Hnrnpul1	2.01909e-13	0.496769	0.356	0.065	3.58853e-09
Prdx5	4.03443e-05	0.495783	0.78	0.491	0.71704
Trappc6b	1.24432e-10	0.491402	0.424	0.108	2.21153e-06
Tbc1d4	1.38395e-08	0.490255	0.424	0.129	0.00024597
Trp53inp2	2.10103e-08	0.48988	0.254	0.055	0.000373415
Exph5	1.36589e-14	0.489274	0.305	0.043	2.4276e-10
Sestd1	3.5713e-06	0.487301	0.305	0.097	0.0634727
Ndufs5	7.16755e-07	0.486189	0.78	0.36	0.0127389
Irf2bpl	1.05461e-08	0.484755	0.407	0.118	0.000187436
Slk	9.72995e-07	0.48446	0.271	0.074	0.017293
Pet100	1.08273e-10	0.483488	0.441	0.116	1.92433e-06
Tbl1x	6.25939e-10	0.483078	0.475	0.136	1.11248e-05
Csnk2a1	2.3452e-09	0.482495	0.525	0.168	4.16813e-05
Romo1	3.35346e-06	0.48154	0.712	0.338	0.059601
Clint1	1.41859e-08	0.478897	0.475	0.152	0.000252126
Gstt1	7.45131e-11	0.477772	0.542	0.159	1.32432e-06
Map2k2	1.8087e-10	0.477327	0.542	0.159	3.21461e-06
Atp1b1	0.000159136	0.477302	0.78	0.487	1
Dnlz	1.25405e-10	0.477146	0.373	0.087	2.22883e-06
Selenos	2.90667e-06	0.476391	0.746	0.355	0.0516603
Fmo2	5.85072e-08	0.475778	0.542	0.192	0.00103985
Ghitm	1.49258e-05	0.475542	0.492	0.207	0.265276
Sptbn1	8.50006e-14	0.475519	0.627	0.166	1.51072e-09
Pex7	7.40659e-10	0.474734	0.22	0.036	1.31637e-05
Cep170b	1.25376e-09	0.473814	0.322	0.074	2.22831e-05
Timm23	2.5684e-12	0.473269	0.475	0.114	4.56482e-08
Gng5	4.28265e-05	0.471146	0.898	0.724	0.761155
Tspan13	1.06382e-05	0.470547	0.678	0.328	0.189073
Lrba	4.94191e-09	0.470354	0.305	0.071	8.78325e-05
Pkp4	1.80537e-07	0.469433	0.458	0.158	0.00320868
Prpf40a	1.66166e-12	0.468525	0.525	0.133	2.95327e-08
Tut4	6.57134e-08	0.466788	0.322	0.085	0.00116792
Cdk2ap2	1.45088e-09	0.463218	0.441	0.126	2.57865e-05
Wls	9.34903e-05	0.462803	0.475	0.214	1
Sub1	1.64574e-05	0.462232	0.661	0.328	0.292498
Ccdc12	7.56074e-06	0.461989	0.475	0.192	0.134377
Tcf25	4.89999e-07	0.460894	0.593	0.246	0.00870876
Tent5b	1.33012e-08	0.459744	0.407	0.117	0.000236402
Cast	2.27881e-09	0.459066	0.424	0.12	4.05013e-05
Galnt2	3.61308e-16	0.458851	0.373	0.058	6.42152e-12
Atl3	1.78649e-09	0.458755	0.288	0.061	3.17514e-05
Vdac3	2.0545e-08	0.458317	0.458	0.146	0.000365146
Ano6	1.3159e-07	0.457809	0.237	0.053	0.00233876
Pgam1	3.07474e-10	0.457765	0.525	0.156	5.46473e-06
Ncor1	4.49271e-08	0.45759	0.576	0.214	0.00079849
Mrps14	5.94691e-06	0.45618	0.661	0.299	0.105694
Ptk2	1.34256e-10	0.456064	0.237	0.038	2.38614e-06
Zfand5	8.70136e-08	0.456039	0.61	0.23	0.00154649
Iqgap2	1.32253e-08	0.454246	0.593	0.211	0.000235053
Rbm25	5.08952e-08	0.45343	0.525	0.185	0.00090456
Dab2ip	4.709e-09	0.453322	0.373	0.098	8.36931e-05
Bcap31	1.76324e-07	0.451363	0.678	0.276	0.00313381
Nucks1	1.55775e-06	0.45058	0.508	0.202	0.0276859
Atp13a5	5.78589e-17	0.450539	0.288	0.032	1.02833e-12
Trpm6	6.52729e-12	0.450352	0.271	0.043	1.16009e-07
Abi1	1.93869e-07	0.450254	0.322	0.091	0.00344564
Ece1	3.54856e-08	0.449662	0.542	0.194	0.000630686
Hadh	5.73857e-09	0.449444	0.407	0.114	0.000101992
Bsdc1	1.78125e-07	0.448755	0.254	0.062	0.00316581
Pdcd4	1.17521e-05	0.448568	0.847	0.465	0.208871
Tpd52	5.6096e-07	0.447248	0.61	0.257	0.00996995
Rassf4	1.55505e-20	0.447114	0.22	0.012	2.7638e-16
Prrc2c	8.35364e-08	0.446391	0.559	0.211	0.00148469
Tmem176b	1.58742e-05	0.446221	0.966	0.772	0.282132
Mrpl14	9.4039e-07	0.445802	0.678	0.298	0.0167136
Mcee	3.39461e-07	0.445707	0.475	0.169	0.00603325
Swi5	4.50941e-06	0.445306	0.712	0.338	0.0801457
Folr1	1.82861e-05	0.445251	0.61	0.289	0.325
Zc3h13	5.5505e-10	0.444641	0.305	0.065	9.8649e-06
Txnl1	9.52106e-08	0.444303	0.61	0.233	0.00169218
Purb	2.99663e-09	0.444182	0.508	0.158	5.3259e-05
Lrrfip1	1.3644e-08	0.443944	0.475	0.153	0.000242495
Msi2	5.62075e-06	0.443696	0.661	0.312	0.0998975
Sf3b4	2.05221e-12	0.443413	0.271	0.04	3.6474e-08
Actn1	2.11166e-08	0.443215	0.576	0.204	0.000375306
Sc5d	2.91347e-08	0.442584	0.322	0.084	0.000517812
Lipe	8.1636e-09	0.442012	0.203	0.035	0.000145092
Ndufc2	0.000293134	0.441357	0.763	0.41	1
Anxa3	3.86588e-15	0.440852	0.373	0.061	6.87084e-11
Zbtb38	2.70619e-10	0.440814	0.39	0.094	4.80971e-06
Rpl10	2.96417e-06	0.440244	0.983	0.827	0.0526823
Ncstn	3.35639e-08	0.440086	0.322	0.082	0.000596531
Glul	0.000138712	0.439756	0.814	0.461	1
Dynll1	5.14187e-05	0.438869	0.949	0.708	0.913865
Trappc2l	3.43749e-09	0.438747	0.492	0.155	6.10946e-05
Mrtfb	5.02098e-09	0.43866	0.339	0.084	8.9238e-05
Rhou	7.65465e-06	0.438445	0.559	0.238	0.136046
Trim56	2.51131e-13	0.43843	0.322	0.053	4.46334e-09
Crip1	1.1089e-11	0.438089	0.475	0.117	1.97085e-07
Sfr1	2.37955e-09	0.437928	0.576	0.189	4.22918e-05
Vdac2	1.57231e-05	0.436981	0.61	0.28	0.279446
Tmem205	1.58774e-05	0.436295	0.78	0.392	0.282189
Tut7	4.33504e-11	0.436094	0.322	0.064	7.70466e-07
Cdk9	6.50209e-10	0.436074	0.288	0.058	1.15562e-05
Gmps	4.53625e-08	0.435451	0.305	0.079	0.000806228
Ptges	1.38273e-17	0.435314	0.339	0.043	2.45753e-13
Mak16	3.78644e-11	0.432564	0.203	0.026	6.72965e-07
Sybu	1.65885e-11	0.432462	0.237	0.035	2.94827e-07
Parva	3.75669e-06	0.430679	0.322	0.104	0.0667676
Ndufa1	2.45691e-06	0.429161	0.661	0.29	0.0436667
Slc25a4	5.85485e-08	0.428317	0.475	0.156	0.00104058
Vegfb	2.1054e-11	0.427928	0.305	0.056	3.74192e-07
Cgn	1.21041e-09	0.427561	0.305	0.066	2.15126e-05
Shoc2	1.88287e-11	0.426959	0.339	0.069	3.34643e-07
Vcp	2.64174e-07	0.426448	0.797	0.348	0.00469517
St6galnac1	9.14932e-07	0.426276	0.441	0.16	0.0162611
Echs1	6.06977e-09	0.426011	0.458	0.137	0.000107878
Fam221a	2.59413e-11	0.425988	0.254	0.04	4.61055e-07
Ccni	2.0651e-08	0.425395	0.407	0.117	0.000367031
0610009B22Rik	3.72423e-11	0.423654	0.373	0.082	6.61907e-07
Car12	2.28589e-07	0.423352	0.627	0.25	0.00406271
Psmb5	1.01588e-05	0.423209	0.695	0.328	0.180552
Psmd2	9.34131e-08	0.421377	0.475	0.162	0.00166023
Gnb1	3.87495e-10	0.421035	0.627	0.208	6.88696e-06
Pbrm1	5.30943e-10	0.420651	0.475	0.133	9.43645e-06
Crybg3	6.69497e-06	0.420433	0.254	0.075	0.11899
Abcf3	2.79207e-07	0.420151	0.203	0.042	0.00496235
Snx2	1.38715e-12	0.42014	0.356	0.068	2.46539e-08
Slc46a3	1.27676e-13	0.419605	0.322	0.052	2.26919e-09
Fkbp5	9.48785e-06	0.418598	0.22	0.061	0.168628
Atp2a2	1.95593e-10	0.418573	0.508	0.147	3.47628e-06
Nampt	7.40579e-06	0.418026	0.237	0.068	0.131623
Smco4	2.55934e-08	0.417184	0.508	0.175	0.000454871
Upb1	2.0878e-07	0.416377	0.356	0.107	0.00371064
Srsf11	3.34406e-10	0.416289	0.542	0.166	5.94341e-06
Aftph	1.87463e-10	0.416011	0.441	0.116	3.33177e-06
Bdp1	8.88969e-16	0.415718	0.339	0.049	1.57997e-11
Hnrnpdl	8.46631e-13	0.414665	0.424	0.092	1.50472e-08
Sidt1	1.07111e-07	0.414443	0.254	0.059	0.00190368
Sgk1	3.00696e-10	0.413523	0.288	0.056	5.34427e-06
Atpif1	0.00198046	0.41269	0.814	0.62	1
Nolc1	1.42478e-13	0.412658	0.339	0.058	2.53226e-09
Prpf6	2.11705e-09	0.41258	0.254	0.049	3.76263e-05
Myh14	7.13659e-08	0.412425	0.356	0.101	0.00126839
Tma7	3.36222e-07	0.412001	0.678	0.275	0.00597568
F8a	7.70296e-06	0.411713	0.22	0.059	0.136905
Pgrmc2	1.16465e-06	0.41138	0.508	0.195	0.0206993
Vps36	8.3951e-07	0.410865	0.322	0.097	0.0149206
Acsm1	0.000167138	0.410177	0.729	0.412	1
Obp1b	0.0039149	0.410092	0.39	0.212	1
Psip1	2.30329e-13	0.410008	0.407	0.084	4.09364e-09
Oat	1.20755e-05	0.408553	0.78	0.393	0.214618
Ttc3	1.67523e-07	0.408527	0.237	0.053	0.00297738
Pde4dip	1.94412e-11	0.408043	0.288	0.051	3.45528e-07
Spats2l	8.41687e-08	0.407253	0.271	0.065	0.00149593
Ccl9	0.000680347	0.406676	0.898	0.59	1
Smarca5	5.48059e-08	0.406361	0.508	0.176	0.000974065
Gstm2	6.6023e-06	0.406162	0.695	0.318	0.117343
Trim2	1.04672e-11	0.404962	0.576	0.159	1.86034e-07
Il17re	3.01622e-09	0.40435	0.356	0.09	5.36072e-05
Spag9	6.65949e-09	0.404138	0.356	0.092	0.000118359
Pdcd5	2.26539e-08	0.404089	0.559	0.194	0.000402627
Anxa1	0.00443814	0.403761	0.712	0.471	1
Eea1	8.22643e-12	0.403185	0.373	0.078	1.46208e-07
Spcs1	4.31679e-07	0.401932	0.661	0.276	0.00767222
Laptm4a	0.000356888	0.400948	0.797	0.504	1
Dbndd2	2.18521e-10	0.400701	0.305	0.062	3.88377e-06
Tm9sf2	8.53229e-08	0.399627	0.492	0.172	0.00151644
Lyar	1.96136e-08	0.398925	0.288	0.068	0.000348592
Osbpl2	4.64079e-08	0.398862	0.271	0.064	0.000824808
Tm9sf3	0.000261553	0.398739	0.678	0.383	1
Nme7	1.14408e-05	0.398464	0.237	0.068	0.203337
Hnrnpa2b1	9.8455e-06	0.398179	0.78	0.392	0.174984
Bccip	4.38884e-11	0.397935	0.441	0.11	7.80028e-07
Ccdc47	1.11542e-09	0.397364	0.525	0.163	1.98244e-05
Mdh1	0.000401634	0.39715	0.78	0.428	1
Seh1l	1.18038e-12	0.396929	0.22	0.026	2.09789e-08
Pkn1	3.12065e-11	0.396779	0.271	0.046	5.54632e-07
Meis2	1.93302e-07	0.396725	0.763	0.344	0.00343556
Fgfbp1	5.78953e-07	0.396581	0.661	0.272	0.0102897
Bcl7a	2.873e-10	0.396527	0.203	0.029	5.10618e-06
BC005561	4.79134e-11	0.395835	0.407	0.098	8.51565e-07
Rexo2	6.12413e-07	0.39581	0.559	0.224	0.0108844
Tacstd2	1.03682e-12	0.395221	0.356	0.066	1.84274e-08
Cpne3	3.1542e-07	0.39499	0.475	0.172	0.00560596
Cnot1	5.60076e-06	0.394518	0.305	0.095	0.0995423
Sft2d2	1.03874e-09	0.394261	0.576	0.185	1.84615e-05
Rela	5.24349e-06	0.393808	0.237	0.065	0.0931925
Tmem167	2.95508e-05	0.391786	0.424	0.169	0.525206
Raly	9.56549e-06	0.391755	0.305	0.1	0.170007
Sod1	3.22899e-05	0.391665	0.593	0.288	0.573888
Taf1	1.09995e-09	0.391581	0.271	0.053	1.95494e-05
Mif4gd	6.34537e-09	0.391509	0.305	0.071	0.000112776
Ctr9	1.23281e-08	0.391403	0.22	0.04	0.000219107
Rac1	9.65684e-08	0.390232	0.644	0.251	0.00171631
Tmem176a	0.000369021	0.389978	0.966	0.76	1
Ndrg3	2.13506e-09	0.389848	0.441	0.124	3.79464e-05
Uqcr11	0.00673898	0.389557	0.78	0.52	1
Smagp	2.25342e-13	0.388715	0.339	0.058	4.005e-09
Rrm2b	3.72849e-09	0.38862	0.237	0.043	6.62664e-05
Mettl9	7.61492e-09	0.38851	0.322	0.079	0.00013534
Uqcrc2	4.67502e-09	0.388468	0.475	0.145	8.30891e-05
Csad	2.01758e-10	0.387542	0.339	0.075	3.58584e-06
Isoc1	1.39271e-09	0.386224	0.288	0.061	2.47527e-05
Psmc6	5.65732e-08	0.386075	0.508	0.171	0.00100548
Lmo7	1.69573e-12	0.385126	0.458	0.105	3.01381e-08
Cox7a2	0.00182735	0.38501	0.831	0.536	1
Nfic	1.68602e-07	0.384729	0.458	0.155	0.00299657
Psma3	3.41929e-05	0.384667	0.678	0.344	0.60771
Kmt2c	1.62294e-06	0.384503	0.322	0.101	0.0288446
Irak1	1.65546e-11	0.383731	0.39	0.087	2.94225e-07
Ctcf	7.55583e-16	0.383575	0.39	0.064	1.3429e-11
Spop	4.60124e-10	0.383197	0.458	0.126	8.17779e-06
Glud1	1.34026e-12	0.383094	0.322	0.056	2.38204e-08
Son	3.75435e-06	0.382712	0.678	0.308	0.0667261
Rab6a	2.60119e-10	0.382697	0.356	0.081	4.62309e-06
Ist1	3.52953e-15	0.380928	0.407	0.072	6.27304e-11
Ost4	0.00024092	0.380675	0.627	0.329	1
Tspo	0.000106431	0.380482	0.763	0.412	1
Churc1	9.34056e-07	0.379899	0.508	0.186	0.016601
Kif5b	1.00002e-05	0.379716	0.627	0.285	0.177734
Zfp638	1.38827e-08	0.379522	0.39	0.11	0.000246737
Cdk4	7.22497e-10	0.379495	0.305	0.065	1.28409e-05
Hspa4	5.27954e-07	0.379369	0.407	0.139	0.00938333
Cpsf2	9.27771e-07	0.378691	0.22	0.052	0.0164893
Krcc1	8.49862e-08	0.376905	0.441	0.14	0.00151046
Nqo1	4.78198e-08	0.376669	0.271	0.064	0.000849901
Rsrp1	1.96539e-06	0.376298	0.542	0.224	0.0349308
Vps41	3.80614e-09	0.37628	0.237	0.045	6.76465e-05
Ehf	8.64076e-05	0.37612	0.864	0.601	1
Usp9x	8.09759e-08	0.376097	0.441	0.14	0.00143919
Arl15	1.30904e-09	0.37577	0.237	0.042	2.32656e-05
Rnf130	3.74515e-08	0.37545	0.356	0.1	0.000665626
Smim11	4.88006e-08	0.375382	0.441	0.139	0.000867334
Ilrun	3.01601e-10	0.375127	0.441	0.116	5.36036e-06
Ptpn18	5.60776e-06	0.375124	0.475	0.185	0.0996666
Spen	6.78764e-11	0.374861	0.271	0.048	1.20637e-06
Lrrk1	1.03489e-12	0.374427	0.22	0.026	1.8393e-08
Cwh43	6.14124e-20	0.373835	0.339	0.036	1.09148e-15
Hist3h2a	2.01957e-13	0.373472	0.288	0.042	3.58938e-09
Btbd7	3.41632e-09	0.373174	0.305	0.069	6.07182e-05
Ccn1	5.30056e-11	0.373093	0.525	0.145	9.42069e-07
Wbp11	2.73863e-11	0.372852	0.356	0.075	4.86736e-07
Sri	6.64194e-08	0.372843	0.475	0.159	0.00118047
Pgpep1	7.82789e-14	0.372541	0.356	0.062	1.39125e-09
Hist1h4d	3.71804e-11	0.372255	0.22	0.03	6.60807e-07
Npepps	5.21917e-06	0.372243	0.356	0.123	0.0927602
Fmc1	4.05741e-05	0.371898	0.356	0.134	0.721124
Adam28	2.03752e-09	0.371471	0.339	0.081	3.62128e-05
Ntan1	2.86895e-07	0.37067	0.441	0.15	0.00509898
Anxa7	4.10219e-07	0.37036	0.492	0.176	0.00729081
Gm16136	0.000130174	0.37027	0.729	0.39	1
Micos13	0.000448838	0.369813	0.712	0.413	1
Ndufb3	3.09646e-05	0.3695	0.729	0.358	0.550333
Zfp36l1	0.000721389	0.369199	0.746	0.464	1
Dicer1	7.27209e-10	0.368918	0.288	0.058	1.29247e-05
Sgpp1	3.33861e-08	0.367909	0.339	0.09	0.000593371
Immp1l	1.36631e-07	0.367551	0.424	0.137	0.00242835
Osbpl9	1.27481e-08	0.367301	0.407	0.117	0.000226571
Pdzk1ip1	5.66594e-06	0.366665	0.508	0.208	0.100701
Mbd2	1.46971e-09	0.36642	0.424	0.116	2.61212e-05
Ubxn1	1.51388e-07	0.366105	0.525	0.189	0.00269062
Timm8b	5.48654e-08	0.365788	0.525	0.181	0.000975123
Pan3	5.04022e-10	0.365306	0.339	0.077	8.95797e-06
Alyref	7.66258e-11	0.364912	0.373	0.084	1.36187e-06
Rpn1	3.34661e-06	0.364306	0.712	0.324	0.0594793
Ppig	1.07723e-06	0.364041	0.458	0.165	0.0191455
Aimp1	1.65869e-08	0.363643	0.492	0.159	0.000294799
Trim8	1.17697e-06	0.363334	0.424	0.147	0.0209184
Fzd3	5.99481e-10	0.363167	0.22	0.035	1.06546e-05
Pebp1	0.000115493	0.363132	0.864	0.491	1
Setd7	2.0531e-06	0.362678	0.271	0.078	0.0364898
Fgf1	9.86623e-07	0.362406	0.237	0.059	0.0175353
Cdcp1	3.17747e-11	0.362225	0.339	0.068	5.64732e-07
Rassf3	7.99445e-08	0.362023	0.424	0.133	0.00142085
Mrps24	1.56298e-06	0.361929	0.627	0.26	0.0277789
Atp6v1e1	6.78638e-07	0.361884	0.576	0.224	0.0120614
Daglb	2.73785e-11	0.360807	0.22	0.03	4.86598e-07
Psmb3	0.000509194	0.360722	0.661	0.354	1
Fam129b	3.5461e-12	0.360469	0.339	0.064	6.30248e-08
Tfg	0.00570872	0.360463	0.237	0.105	1
Prdx4	2.34999e-06	0.360393	0.356	0.118	0.0417664
Mgat2	9.36325e-09	0.360238	0.373	0.101	0.000166413
Akap13	1.77121e-07	0.360121	0.492	0.173	0.00314797
Cop1	8.51967e-07	0.359726	0.288	0.081	0.015142
Cnot4	1.26567e-09	0.359332	0.322	0.072	2.24948e-05
Trak1	7.50004e-07	0.359115	0.22	0.051	0.0133298
Kcnj15	1.042e-12	0.359042	0.39	0.078	1.85194e-08
Pon1	6.20919e-14	0.358954	0.203	0.019	1.10356e-09
Senp6	1.38539e-10	0.35855	0.424	0.105	2.46225e-06
Runx1	0.000202546	0.358371	0.729	0.4	1
Hspe1	0.000258462	0.358183	0.61	0.314	1
Aldh2	6.82054e-05	0.357696	0.847	0.457	1
Cox17	4.45629e-06	0.357675	0.492	0.189	0.0792016
Naxe	1.22294e-07	0.357386	0.39	0.12	0.00217354
Agr2	8.74701e-05	0.356916	0.881	0.568	1
Chchd10	0.00141364	0.356904	0.864	0.565	1
Ahnak	4.10744e-05	0.356737	0.542	0.251	0.730015
Cops6	3.26521e-08	0.356564	0.407	0.12	0.000580325
Barx2	2.45366e-06	0.35656	0.712	0.324	0.0436089
Rack1	0.00144026	0.356413	0.898	0.636	1
Rasa2	3.7152e-09	0.356258	0.271	0.056	6.60303e-05
Prrc2b	6.47091e-13	0.356252	0.458	0.104	1.15007e-08
Plcb4	1.0389e-07	0.356193	0.627	0.241	0.00184644
Iqgap1	1.48185e-07	0.355807	0.559	0.204	0.00263369
Fam162a	1.49892e-09	0.355788	0.373	0.094	2.66403e-05
Macf1	2.72519e-12	0.355767	0.356	0.069	4.84347e-08
Ssu72	2.29133e-07	0.355415	0.492	0.176	0.00407238
Dnajb11	1.35336e-10	0.354951	0.458	0.121	2.40533e-06
Rabl6	3.6957e-07	0.354888	0.305	0.085	0.00656837
Hdac2	4.06226e-08	0.354686	0.254	0.056	0.000721986
Mrps33	7.8695e-06	0.354462	0.593	0.262	0.139865
Tnks1bp1	4.14628e-08	0.354379	0.305	0.077	0.000736919
Kat2b	1.1007e-08	0.354358	0.373	0.101	0.000195628
Trip12	9.52736e-08	0.354311	0.322	0.087	0.0016933
Tbl1xr1	2.54054e-10	0.35406	0.288	0.056	4.51531e-06
Cebpzos	2.34757e-05	0.353986	0.305	0.105	0.417234
Atp5g3	1.06568e-05	0.35342	0.729	0.37	0.189404
Gnas	0.000386398	0.353122	0.864	0.538	1
Pcbp2	4.25756e-06	0.352798	0.593	0.259	0.0756696
Pdlim5	5.49475e-06	0.352337	0.271	0.081	0.0976582
Sfxn1	1.35631e-08	0.352114	0.339	0.088	0.000241058
Arhgap21	7.63987e-08	0.351934	0.322	0.087	0.00135783
Cpeb4	5.97435e-10	0.351685	0.322	0.071	1.06182e-05
Tob2	5.92731e-09	0.3515	0.424	0.12	0.000105346
Itch	3.66617e-08	0.35124	0.322	0.082	0.000651589
Mcf2l	1.49451e-12	0.350608	0.22	0.026	2.6562e-08
Dcxr	1.70619e-06	0.350597	0.525	0.207	0.0303241
Btaf1	1.87555e-08	0.350578	0.237	0.048	0.000333341
Pbxip1	1.23689e-10	0.350296	0.322	0.066	2.19833e-06
Rabgap1l	3.37929e-08	0.350176	0.322	0.082	0.000600601
Hsph1	1.34959e-11	0.350049	0.441	0.105	2.39863e-07
Acsl3	4.06261e-07	0.349573	0.305	0.087	0.00722047
Cd2ap	1.62112e-07	0.349506	0.559	0.207	0.00288122
Cct2	6.99232e-09	0.349427	0.508	0.162	0.000124275
Wwc1	1.85907e-08	0.349309	0.407	0.118	0.000330412
Cx3cl1	1.04161e-07	0.349236	0.356	0.101	0.00185126
Tmem160	2.26187e-07	0.348752	0.508	0.182	0.00402002
Plscr3	2.50899e-08	0.348709	0.22	0.042	0.000445923
Endod1	7.21821e-09	0.348282	0.339	0.085	0.000128289
Adtrp	8.66384e-08	0.347265	0.305	0.078	0.00153982
Nop58	8.79646e-09	0.347039	0.288	0.065	0.000156339
Kdsr	2.2493e-11	0.346903	0.288	0.051	3.99768e-07
Grhl2	4.18001e-09	0.346675	0.39	0.105	7.42913e-05
Tmsb4x	0.000368285	0.346409	0.983	0.918	1
Rasef	1.06093e-12	0.346214	0.237	0.03	1.88559e-08
Nr3c2	7.39819e-10	0.345824	0.288	0.058	1.31488e-05
Mfsd6	4.65953e-08	0.345794	0.559	0.199	0.000828139
Bcl7b	4.29807e-06	0.344279	0.254	0.072	0.0763897
H2afj	0.000726014	0.344188	0.915	0.552	1
Slc25a16	1.08075e-09	0.343944	0.271	0.053	1.92082e-05
Usp4	4.89033e-09	0.343859	0.288	0.064	8.69159e-05
Mrpl18	5.93761e-10	0.343853	0.458	0.126	1.05529e-05
Nfyb	1.8844e-09	0.343593	0.203	0.032	3.34914e-05
Runx2	3.95788e-10	0.343445	0.271	0.051	7.03434e-06
Me1	1.34395e-05	0.34319	0.508	0.212	0.23886
Sdf2	2.20463e-06	0.342441	0.305	0.091	0.039183
Alg2	3.5154e-13	0.342094	0.203	0.02	6.24792e-09
Bnip3	9.71052e-05	0.341712	0.203	0.062	1
Ramp1	2.78599e-09	0.341635	0.424	0.117	4.95154e-05
Fkbp1a	1.22948e-08	0.341355	0.458	0.14	0.000218516
Top2b	6.32687e-10	0.341305	0.458	0.126	1.12447e-05
Naa50	1.24238e-09	0.340999	0.492	0.145	2.20807e-05
Hnrnpk	7.56165e-07	0.340939	0.746	0.318	0.0134393
Pigp	9.58215e-09	0.340558	0.458	0.139	0.000170304
Ift52	5.0416e-07	0.340116	0.203	0.043	0.00896044
Cgnl1	1.21418e-08	0.339804	0.441	0.13	0.000215796
Gspt1	3.07624e-07	0.339551	0.441	0.147	0.00546739
Gtf2b	6.49243e-08	0.339402	0.288	0.072	0.0011539
Mtpn	7.3769e-12	0.339392	0.458	0.111	1.3111e-07
Casz1	2.76862e-11	0.339029	0.458	0.113	4.92066e-07
Rab5if	5.98099e-07	0.338941	0.475	0.173	0.01063
Nenf	4.07252e-05	0.338572	0.678	0.321	0.723808
Aktip	4.66678e-05	0.33851	0.22	0.066	0.829427
Cdc40	2.63785e-10	0.337949	0.305	0.062	4.68825e-06
Hspd1	1.19592e-06	0.337855	0.441	0.156	0.021255
Adgrg6	9.48647e-05	0.337417	0.39	0.159	1
Rps25	0.00087512	0.337415	0.949	0.731	1
Nedd4l	4.26465e-07	0.337396	0.441	0.152	0.00757957
Gnai2	4.55135e-07	0.336945	0.508	0.189	0.00808911
Psmd7	4.35407e-07	0.336832	0.61	0.241	0.00773849
Ifitm2	0.000208671	0.336211	0.678	0.342	1
Tcf20	3.04728e-08	0.335947	0.254	0.055	0.000541594
Dag1	3.98814e-08	0.33581	0.441	0.137	0.000708811
Aldoa	0.000218371	0.335159	0.881	0.516	1
Acin1	1.49098e-09	0.334701	0.542	0.171	2.64992e-05
Srp14	0.000284266	0.334578	0.695	0.364	1
Rnasek	0.000112198	0.334185	0.881	0.503	1
Psmd8	2.23323e-05	0.333958	0.441	0.179	0.396913
Naca	0.00584876	0.333868	0.932	0.705	1
Polr2f	9.13419e-07	0.33373	0.695	0.286	0.0162342
Mpv17l	1.28484e-11	0.333536	0.203	0.025	2.28355e-07
Med13l	1.05084e-08	0.332964	0.288	0.065	0.000186766
Taldo1	0.000975734	0.332824	0.966	0.751	1
Ehbp1	2.2747e-07	0.332614	0.22	0.048	0.00404282
Ppa2	2.26541e-10	0.332393	0.305	0.061	4.02631e-06
Tspan7	3.57144e-06	0.331905	0.254	0.072	0.0634751
Zwint	1.03546e-10	0.331726	0.305	0.059	1.84032e-06
Rnpep	2.07666e-07	0.331479	0.373	0.114	0.00369084
Atp5md	2.23419e-05	0.331478	0.661	0.314	0.397082
Snrnp27	2.65184e-05	0.33063	0.339	0.123	0.471312
Prkar1a	1.95387e-07	0.330612	0.441	0.146	0.00347261
Pbdc1	3.34495e-07	0.330513	0.237	0.056	0.00594497
Ppia	0.000975604	0.330389	1	0.876	1
Ndufs7	7.28834e-06	0.330057	0.678	0.302	0.129536
Smurf2	6.36197e-09	0.329676	0.22	0.039	0.000113071
Psma2	7.55916e-05	0.329602	0.729	0.364	1
Jkamp	8.98797e-08	0.329287	0.203	0.039	0.00159743
Tpd52l1	3.87161e-09	0.329027	0.39	0.104	6.88102e-05
Trp53bp2	4.90774e-08	0.32901	0.254	0.056	0.000872253
Nr2f6	2.8775e-07	0.328517	0.322	0.092	0.00511418
Tmem128	9.39767e-08	0.328513	0.475	0.158	0.00167025
Ywhaz	0.00035149	0.328168	0.61	0.318	1
Mat2b	9.01492e-08	0.328027	0.441	0.14	0.00160222
Sec62	0.00024326	0.327841	0.661	0.334	1
Tmod3	1.0432e-05	0.327774	0.288	0.092	0.185409
Ormdl3	5.23663e-06	0.32763	0.305	0.098	0.0930707
Ddx46	2.64327e-08	0.327561	0.322	0.082	0.000469788
Rhbdd2	1.25965e-11	0.327488	0.237	0.033	2.23878e-07
Por	0.00280898	0.327256	0.712	0.445	1
Mrps35	6.6689e-13	0.327218	0.305	0.049	1.18526e-08
Rcn2	2.23059e-08	0.326829	0.492	0.16	0.000396442
Phip	2.07984e-06	0.326746	0.492	0.186	0.036965
Tpr	1.1947e-06	0.3266	0.475	0.178	0.0212334
Arih1	3.40951e-08	0.326271	0.305	0.077	0.000605973
Kdm1a	8.08576e-08	0.326264	0.305	0.079	0.00143708
Anxa4	2.67226e-11	0.325882	0.441	0.107	4.74942e-07
Hook1	4.73973e-06	0.325827	0.288	0.088	0.0842392
Ccpg1	4.61689e-07	0.325397	0.492	0.175	0.0082056
Ikzf2	1.23301e-05	0.324831	0.305	0.103	0.219142
Mvb12a	6.13386e-07	0.323084	0.407	0.136	0.0109017
Hacd4	2.1052e-18	0.322566	0.237	0.017	3.74158e-14
Kcnk1	1.1683e-08	0.322153	0.458	0.14	0.000207642
Pkn2	5.41847e-05	0.322084	0.373	0.146	0.963024
Wbp2	0.0247596	-0.323013	0.271	0.136	1
Ifrd1	0.167941	-0.323026	0.237	0.146	1
Phlda1	0.35817	-0.327439	0.678	0.468	1
Rras	0.0909058	-0.328779	0.254	0.145	1
Bckdha	0.246236	-0.331105	0.203	0.13	1
Esp16	0.0100384	-0.331522	0.627	0.824	1
Ss18l2	0.119401	-0.331716	0.373	0.227	1
Pfdn6	0.0427565	-0.334984	0.373	0.207	1
Scgb1b24	0.00758385	-0.350356	0.678	0.734	1
Tac1	0.128868	-0.352242	0.22	0.129	1
Zfp36	0.0759141	-0.358128	0.39	0.237	1
Fxyd3	0.00509121	-0.362267	0.915	0.909	1
Rps26	0.121912	-0.364935	0.881	0.775	1
1810026B05Rik	0.111404	-0.37825	0.22	0.126	1
Tle5	0.94464	-0.379967	0.61	0.47	1
Gm8978	0.0092426	-0.382004	0.288	0.441	1
mt-Cytb	0.0293509	-0.382043	0.983	0.993	1
Pdap1	0.0242065	-0.382231	0.424	0.228	1
Scgb1b7	0.00383861	-0.386847	1	0.999	1
Fuca1	0.0331114	-0.393767	0.271	0.137	1
Scgb1b20	0.00589456	-0.395143	1	1	1
mt-Nd4	0.0207995	-0.39625	0.983	0.977	1
Scgb1b3	0.00570314	-0.396742	0.627	0.857	1
Esp15	0.000216039	-0.39824	1	0.991	1
Wfdc12	0.0030496	-0.399841	0.729	0.84	1
Fkbp4	0.280112	-0.40654	0.475	0.302	1
mt-Nd4l	0.605199	-0.407149	0.797	0.634	1
Fkbp8	0.0115559	-0.408413	0.373	0.184	1
Ech1	0.110582	-0.411744	0.339	0.199	1
Gm44501	0.434928	-0.415743	0.288	0.21	1
Smr3a	1.9878e-05	-0.422776	0.373	0.134	0.353292
Gm1553	0.00121653	-0.425329	1	1	1
Eif3h	0.302203	-0.431881	0.508	0.329	1
Cbx6	0.00929307	-0.433348	0.305	0.142	1
Esp18	0.00183585	-0.433581	1	0.98	1
Ier3	0.0997732	-0.434525	0.525	0.328	1
mt-Nd3	0.11231	-0.43549	0.898	0.805	1
Cited4	0.631337	-0.436614	0.678	0.545	1
Mt1	0.0313308	-0.447765	0.305	0.16	1
Itm2c	0.14114	-0.452844	0.322	0.195	1
mt-Co2	0.00182814	-0.461256	0.983	0.994	1
Bpifa2	8.87171e-05	-0.463334	0.373	0.145	1
Surf4	0.11955	-0.464128	0.322	0.189	1
Ctsz	0.987	-0.473389	0.203	0.179	1
Pip	0.000116846	-0.483787	1	0.999	1
Lars2	0.816584	-0.492294	0.339	0.28	1
Mucl2	3.51089e-09	-0.494976	1	1	6.2399e-05
Aqp5	0.654753	-0.495008	0.729	0.558	1
mt-Co1	0.000107932	-0.50402	0.983	0.997	1
mt-Atp6	9.08107e-05	-0.504794	1	0.997	1
Gstm5	0.162766	-0.507172	0.373	0.228	1
H2-K1	0.349961	-0.507649	0.831	0.663	1
Psap	0.476114	-0.508115	0.644	0.506	1
Ifi27l2a	0.462293	-0.51723	0.593	0.569	1
Sval2	0.00308496	-0.518571	0.898	0.871	1
Gadd45g	0.308855	-0.519334	0.424	0.296	1
Selenom	0.383651	-0.519745	0.475	0.319	1
Malat1	0.0225879	-0.52441	0.983	0.988	1
Esp6	7.6946e-07	-0.557777	1	1	0.0136756
Glmp	0.228903	-0.564067	0.271	0.171	1
Dnase1	0.35667	-0.595665	0.695	0.598	1
B2m	0.613198	-0.646688	0.576	0.454	1
Esp4	0.978802	-0.661305	0.61	0.447	1
H2-D1	0.0877809	-0.665876	0.644	0.582	1
Gm5938	2.1352e-05	-0.667168	1	1	0.379489
Lpo	0.0313418	-0.670174	0.407	0.467	1
9530002B09Rik	0.00100757	-0.683244	0.729	0.756	1
mt-Co3	2.9282e-07	-0.699154	1	0.997	0.0052043
Gm42418	5.07639e-06	-0.749724	1	0.986	0.0902227
Atf3	0.694424	-0.790797	0.22	0.228	1
Pglyrp1	0.0200386	-0.803536	0.712	0.633	1
Obp1a	1.16391e-06	-0.862475	1	1	0.0206861
Clu	0.33044	-0.933011	0.373	0.25	1
AY036118	0.0667024	-1.23054	0.356	0.386	1
Gm12888	0.000268783	-1.29741	0.627	0.717	1
Bglap3	0.156454	-1.33415	0.525	0.496	1
Cldn10	2.35828e-05	-1.52986	0.153	0.405	0.419137
2310057J18Rik	6.00719e-07	-1.54113	0.644	0.809	0.0106766
Mup4	8.25829e-10	-1.68028	0.831	0.941	1.46775e-05
Car6	0.122199	-2.34542	0.729	0.613	1
