# Supplementary material for: The First Transcriptomic Atlas of the Adult Lacrimal Gland Reveals Epithelial Complexity and Identifies Novel Progenitor Cells in Mice
Source: Cells. 2023 May 21;12(10):1435. doi: 10.3390/cells12101435 (PMC10216974; doi:10.3390/cells12101435)
Supplement: Supplementary file 1 [file cells-12-01435-s001.zip › Table S5 - Top-25 cluster markers for the P4 lacrimal gland.xlsx]

## Sheet: Table S5 - Top-25 cluster marke
cluster	p_val	avg_log2FC	pct.1	pct.2	p_val_adj	gene
0. Parenchymal fibroblasts	3.09157e-44	2.14378	0.678	0.102	4.37303e-40	Col15a1
0. Parenchymal fibroblasts	1.80226e-42	2.05891	0.876	0.274	2.54929e-38	Col6a1
0. Parenchymal fibroblasts	2.57291e-41	2.67777	0.702	0.132	3.63938e-37	Kera
0. Parenchymal fibroblasts	2.91825e-40	2.14335	0.917	0.368	4.12787e-36	Ptn
0. Parenchymal fibroblasts	1.72126e-39	2.07565	0.975	0.473	2.43473e-35	Cdkn1c
0. Parenchymal fibroblasts	1.3181e-38	1.9825	0.901	0.331	1.86446e-34	Igfbp7
0. Parenchymal fibroblasts	1.11726e-36	1.88539	0.785	0.231	1.58036e-32	Eva1b
0. Parenchymal fibroblasts	2.21309e-36	1.94451	0.835	0.266	3.13042e-32	Ndn
0. Parenchymal fibroblasts	3.73955e-36	2.11845	0.479	0.035	5.28959e-32	RP23-41J14.2
0. Parenchymal fibroblasts	2.95298e-35	1.72503	0.826	0.236	4.17699e-31	Col6a2
0. Parenchymal fibroblasts	4.91266e-35	2.17996	0.496	0.05	6.94896e-31	Crabp1
0. Parenchymal fibroblasts	5.02259e-35	1.79672	0.893	0.348	7.10446e-31	Mdk
0. Parenchymal fibroblasts	3.83415e-34	1.84965	0.909	0.425	5.42341e-30	Maged2
0. Parenchymal fibroblasts	5.08345e-34	1.93315	0.992	0.495	7.19054e-30	Dcn
0. Parenchymal fibroblasts	8.776e-34	1.7121	0.934	0.341	1.24137e-29	Lum
0. Parenchymal fibroblasts	1.88558e-33	1.98768	0.95	0.485	2.66716e-29	Gsn
0. Parenchymal fibroblasts	3.13211e-33	1.86271	0.802	0.274	4.43037e-29	Il11ra1
0. Parenchymal fibroblasts	9.64433e-33	1.7323	0.777	0.226	1.36419e-28	Oaf
0. Parenchymal fibroblasts	6.04453e-32	1.45983	0.95	0.699	8.54999e-28	Ifitm2
0. Parenchymal fibroblasts	8.15353e-32	1.89414	0.719	0.174	1.15332e-27	Igfbp3
0. Parenchymal fibroblasts	9.74001e-32	1.75174	0.694	0.172	1.37772e-27	Ctsk
0. Parenchymal fibroblasts	1.18705e-31	1.75847	0.909	0.341	1.67908e-27	S100a6
0. Parenchymal fibroblasts	1.19656e-31	1.63427	0.926	0.396	1.69254e-27	Dlk1
0. Parenchymal fibroblasts	7.25319e-31	1.33349	0.884	0.299	1.02596e-26	Pcolce
0. Parenchymal fibroblasts	1.38867e-30	1.80047	0.62	0.139	1.96427e-26	Agtr2
1. Adventital fibroblasts	4.42034e-66	2.96045	0.987	0.128	6.25257e-62	Dpt
1. Adventital fibroblasts	8.53845e-58	3.34982	0.909	0.126	1.20776e-53	Ly6a
1. Adventital fibroblasts	2.16855e-57	2.14306	0.87	0.094	3.06741e-53	Tmeff2
1. Adventital fibroblasts	3.0935e-56	4.02709	1	0.242	4.37576e-52	Mfap5
1. Adventital fibroblasts	2.9085e-55	2.37233	0.779	0.065	4.11407e-51	Ly6c1
1. Adventital fibroblasts	3.51941e-54	2.33071	0.922	0.141	4.9782e-50	Plac9c
1. Adventital fibroblasts	3.78149e-54	2.32111	0.948	0.152	5.34891e-50	Htra3
1. Adventital fibroblasts	5.88692e-54	2.4232	0.844	0.103	8.32704e-50	Efemp1
1. Adventital fibroblasts	6.7824e-54	2.44975	0.883	0.126	9.59371e-50	Loxl1
1. Adventital fibroblasts	3.80262e-53	3.04833	0.974	0.206	5.37881e-49	Clec3b
1. Adventital fibroblasts	7.66474e-53	1.7723	0.766	0.067	1.08418e-48	Mmp23
1. Adventital fibroblasts	5.41818e-52	3.11797	0.935	0.166	7.66402e-48	Cthrc1
1. Adventital fibroblasts	7.28079e-52	2.06427	0.714	0.054	1.02987e-47	Tnxb
1. Adventital fibroblasts	2.27219e-50	1.82955	0.662	0.043	3.21401e-46	Fndc1
1. Adventital fibroblasts	7.21965e-48	1.74539	0.61	0.034	1.02122e-43	Qpct
1. Adventital fibroblasts	2.45647e-46	2.34403	0.961	0.222	3.47468e-42	Fn1
1. Adventital fibroblasts	1.95834e-45	2.71209	0.883	0.177	2.77007e-41	Fbn1
1. Adventital fibroblasts	5.074e-45	2.18398	1	0.211	7.17717e-41	Serping1
1. Adventital fibroblasts	8.78256e-45	1.88318	0.818	0.114	1.24229e-40	Aspn
1. Adventital fibroblasts	1.33999e-43	2.50529	0.987	0.287	1.89541e-39	Serpinf1
1. Adventital fibroblasts	2.28269e-43	1.90897	0.883	0.157	3.22887e-39	Col5a1
1. Adventital fibroblasts	3.84145e-43	2.61339	0.844	0.155	5.43373e-39	Igfbp6
1. Adventital fibroblasts	4.0546e-43	2.58013	1	0.406	5.73523e-39	Postn
1. Adventital fibroblasts	1.48651e-42	2.49713	0.948	0.229	2.10267e-38	Tppp3
1. Adventital fibroblasts	2.0285e-42	1.47398	0.584	0.04	2.86931e-38	Pamr1
2. Macrophages	9.70549e-88	5.23193	0.968	0.039	1.37284e-83	C1qa
2. Macrophages	1.48213e-85	5.77007	0.952	0.041	2.09647e-81	C1qc
2. Macrophages	1.85427e-83	5.4678	0.935	0.041	2.62286e-79	C1qb
2. Macrophages	1.84427e-81	3.73446	0.742	0.002	2.60872e-77	Ms4a7
2. Macrophages	4.35805e-80	3.74741	0.984	0.054	6.16447e-76	Tyrobp
2. Macrophages	2.28232e-79	3.75745	0.919	0.039	3.22834e-75	Fcgr3
2. Macrophages	1.09728e-78	4.12395	0.984	0.059	1.55211e-74	Fcer1g
2. Macrophages	1.09797e-77	3.13014	0.823	0.022	1.55308e-73	C5ar1
2. Macrophages	1.20166e-75	3.01731	0.887	0.037	1.69975e-71	Trf
2. Macrophages	1.5945e-74	3.05718	0.726	0.009	2.25542e-70	Cfp
2. Macrophages	2.15179e-73	2.80702	0.839	0.035	3.0437e-69	Csf1r
2. Macrophages	2.48715e-72	3.41153	0.839	0.037	3.51808e-68	Cd68
2. Macrophages	3.36544e-71	5.02509	0.903	0.059	4.76041e-67	Pf4
2. Macrophages	2.52349e-70	4.18439	0.984	0.091	3.56948e-66	Lyz2
2. Macrophages	7.19675e-69	3.66117	0.774	0.026	1.01798e-64	Pld4
2. Macrophages	1.41975e-68	2.94079	0.71	0.015	2.00824e-64	Mrc1
2. Macrophages	8.37508e-68	2.57925	0.742	0.022	1.18466e-63	Ms4a6c
2. Macrophages	4.7392e-64	2.70467	0.823	0.046	6.7036e-60	Cd14
2. Macrophages	1.27394e-63	2.67843	0.79	0.037	1.80199e-59	Alox5ap
2. Macrophages	1.8809e-62	2.64619	0.645	0.013	2.66053e-58	Fcrls
2. Macrophages	2.1642e-62	2.64126	0.71	0.024	3.06126e-58	Aif1
2. Macrophages	5.62211e-62	3.14018	0.71	0.024	7.95247e-58	Ctss
2. Macrophages	1.26016e-61	2.84412	0.661	0.017	1.7825e-57	Ms4a6d
2. Macrophages	1.07285e-59	3.76074	0.726	0.037	1.51754e-55	F13a1
2. Macrophages	1.00155e-58	2.32487	0.581	0.007	1.4167e-54	Clec4a2
3. Lymphoid	2.9987e-73	4.45514	0.697	0.004	4.24166e-69	Ltb
3. Lymphoid	3.88587e-65	3.95855	0.788	0.02	5.49657e-61	Cd52
3. Lymphoid	2.03025e-48	2.63617	0.455	0.002	2.87179e-44	Ptprcap
3. Lymphoid	2.19751e-47	4.15269	0.515	0.008	3.10838e-43	Trbc2
3. Lymphoid	1.06372e-40	3.00188	0.455	0.008	1.50463e-36	Cd3g
3. Lymphoid	1.2283e-39	3.08495	0.424	0.006	1.73743e-35	Itgb7
3. Lymphoid	2.44178e-39	3.50461	0.909	0.11	3.4539e-35	Rac2
3. Lymphoid	4.44073e-38	2.58544	0.333	0	6.28141e-34	Cxcr6
3. Lymphoid	6.38652e-34	2.66212	0.576	0.035	9.03374e-30	Pim1
3. Lymphoid	4.2398e-32	1.78824	0.333	0.004	5.99719e-28	Ltb4r1
3. Lymphoid	2.39036e-31	2.69386	0.273	0	3.38116e-27	Trbc1
3. Lymphoid	3.95041e-31	2.90034	0.485	0.024	5.58786e-27	Cd37
3. Lymphoid	1.41112e-30	3.45726	0.697	0.076	1.99603e-26	Coro1a
3. Lymphoid	1.10064e-29	1.56365	0.333	0.006	1.55686e-25	Tbc1d10c
3. Lymphoid	3.85174e-28	2.26829	0.273	0.002	5.44829e-24	Cd2
3. Lymphoid	1.38716e-25	2.9382	0.636	0.078	1.96214e-21	Lsp1
3. Lymphoid	1.51953e-24	1.9964	0.303	0.008	2.14937e-20	Lat
3. Lymphoid	1.75262e-23	2.3854	0.515	0.051	2.47908e-19	Sept1
3. Lymphoid	1.12459e-22	1.52058	0.303	0.01	1.59073e-18	Tspan32
3. Lymphoid	5.12177e-20	1.96722	0.303	0.014	7.24475e-16	Ikzf1
3. Lymphoid	5.60927e-19	3.14865	0.636	0.112	7.93431e-15	Srgn
3. Lymphoid	4.6711e-18	1.93333	0.394	0.037	6.60727e-14	Grap
3. Lymphoid	1.05563e-17	2.39604	0.879	0.322	1.49318e-13	Arhgdib
3. Lymphoid	9.7552e-16	1.54081	0.303	0.022	1.37987e-11	Itgb2
3. Lymphoid	2.84213e-15	2.30266	0.515	0.092	4.02019e-11	Emb
4. Vascular	6.3172e-46	2.60067	0.466	0.006	8.93568e-42	Esam
4. Vascular	3.37876e-42	2.57891	0.431	0.006	4.77925e-38	Ecscr
4. Vascular	1.5928e-31	2.69764	0.517	0.049	2.25302e-27	Cav1
4. Vascular	3.12746e-31	4.21101	0.466	0.034	4.4238e-27	Fabp4
4. Vascular	1.20192e-30	1.40302	0.328	0.006	1.70011e-26	Myct1
4. Vascular	5.72966e-29	3.08889	0.534	0.062	8.10461e-25	Tm4sf1
4. Vascular	6.16716e-29	3.61218	0.31	0.006	8.72345e-25	Cldn5
4. Vascular	1.34776e-28	1.39366	0.276	0.002	1.9064e-24	Sox18
4. Vascular	1.04601e-25	1.73291	0.293	0.009	1.47959e-21	Aqp1
4. Vascular	1.20702e-25	1.97452	0.293	0.009	1.70733e-21	Emcn
4. Vascular	1.39911e-24	1.52059	0.31	0.013	1.97904e-20	Ctla2a
4. Vascular	1.33042e-23	1.49408	0.276	0.009	1.88188e-19	RP23-375N21.2
4. Vascular	1.81978e-22	1.98103	0.328	0.022	2.57408e-18	Pecam1
4. Vascular	2.15929e-22	1.61784	0.31	0.017	3.05432e-18	Icam2
4. Vascular	4.86646e-22	1.7047	0.259	0.009	6.88361e-18	Aplnr
4. Vascular	3.08762e-19	1.22345	0.276	0.017	4.36744e-15	Cdh5
4. Vascular	3.48317e-17	2.53977	0.414	0.073	4.92695e-13	Egfl7
4. Vascular	4.68961e-16	2.47771	0.466	0.105	6.63345e-12	Sdpr
4. Vascular	6.75879e-15	1.31491	0.259	0.024	9.56031e-11	Gimap4
4. Vascular	1.99176e-13	2.47907	0.569	0.209	2.81734e-09	Gng11
4. Vascular	1.512e-12	2.61897	0.328	0.062	2.13873e-08	Plvap
4. Vascular	1.00886e-11	1.94956	0.345	0.071	1.42703e-07	Cav2
4. Vascular	1.58612e-10	2.01471	0.672	0.424	2.24357e-06	Crip2
4. Vascular	1.71487e-10	2.00015	0.483	0.176	2.42568e-06	Sparcl1
4. Vascular	1.76957e-10	1.09853	0.276	0.049	2.50305e-06	Sept4
5. Myoepithelial	1.46469e-41	5.20439	1	0.166	2.07181e-37	Acta2
5. Myoepithelial	1.59936e-36	3.39589	0.657	0.049	2.26229e-32	Krt14
5. Myoepithelial	2.42757e-34	3.39497	0.486	0.02	3.4338e-30	Dapl1
5. Myoepithelial	4.23946e-28	3.24223	0.514	0.039	5.99672e-24	Igfbp2
5. Myoepithelial	1.0869e-27	3.08451	0.543	0.045	1.53743e-23	Actg2
5. Myoepithelial	6.79348e-23	2.84054	0.514	0.053	9.60938e-19	Tagln
5. Myoepithelial	4.51625e-19	2.88636	0.429	0.045	6.38824e-15	Mia
5. Myoepithelial	4.4682e-18	2.71652	0.486	0.066	6.32027e-14	Nrtn
5. Myoepithelial	1.18626e-17	2.99249	0.857	0.389	1.67797e-13	Myl9
5. Myoepithelial	5.84311e-16	2.76631	0.686	0.197	8.26508e-12	Tpm2
5. Myoepithelial	8.53196e-15	2.35522	0.343	0.037	1.20685e-10	Cnn1
5. Myoepithelial	1.23682e-13	2.59891	0.457	0.084	1.74948e-09	Id4
5. Myoepithelial	7.25699e-11	2.67449	0.429	0.092	1.0265e-06	Lgals7
5. Myoepithelial	9.46909e-11	1.88067	0.8	0.492	1.3394e-06	Oat
5. Myoepithelial	1.08822e-10	1.87181	0.343	0.057	1.53928e-06	Emid1
5. Myoepithelial	2.72147e-10	1.01821	1	0.863	3.84952e-06	Rpl3-ps1
5. Myoepithelial	4.32964e-10	1.51471	0.886	0.803	6.12428e-06	Myl6
5. Myoepithelial	4.79524e-10	0.838145	1	0.936	6.78287e-06	Rpl13
5. Myoepithelial	8.72073e-10	2.07006	0.286	0.043	1.23355e-05	Col9a1
5. Myoepithelial	1.93e-09	1.24308	0.971	0.93	2.72998e-05	Rps14
5. Myoepithelial	2.52984e-09	1.94678	0.514	0.164	3.57846e-05	Tinagl1
5. Myoepithelial	7.08161e-09	1.09032	0.971	0.904	0.000100169	Rpl3
5. Myoepithelial	7.76502e-09	1.01976	0.914	0.906	0.000109836	RP23-82K1.6
5. Myoepithelial	1.1264e-08	0.98008	0.943	0.863	0.00015933	AC122438.1
5. Myoepithelial	1.20355e-08	0.960238	0.914	0.9	0.000170242	Rps19-ps7
6a. Duct	1.14912e-67	2.70614	0.97	0.041	1.62543e-63	Cldn4
6a. Duct	1.5849e-65	0.934809	0.758	0.014	2.24184e-61	Foxq1
6a. Duct	2.49021e-55	2.82375	0.727	0.022	3.52241e-51	Krt7
6a. Duct	2.55937e-55	1.75401	0.697	0.018	3.62022e-51	Tfcp2l1
6a. Duct	5.03395e-55	1.80846	0.879	0.045	7.12052e-51	Ehf
6a. Duct	1.51957e-54	1.04545	0.727	0.022	2.14944e-50	Rab17
6a. Duct	3.11405e-53	2.03965	0.909	0.053	4.40483e-49	Cldn7
6a. Duct	4.49025e-52	1.69209	0.606	0.012	6.35146e-48	Ckmt1
6a. Duct	1.99943e-50	2.086	0.758	0.033	2.82819e-46	Syne4
6a. Duct	1.45889e-49	1.63292	0.848	0.049	2.0636e-45	Lrrc26
6a. Duct	1.79855e-49	1.37442	0.606	0.014	2.54405e-45	Cldn8
6a. Duct	2.69994e-49	2.23367	0.515	0.006	3.81906e-45	Cxcl17
6a. Duct	1.27903e-46	1.00693	0.636	0.02	1.80919e-42	Pax6
6a. Duct	3.48981e-45	1.05972	0.606	0.018	4.93634e-41	Wfdc2
6a. Duct	3.37729e-43	1.40609	0.788	0.051	4.77718e-39	Kcnk1
6a. Duct	9.43785e-43	2.00145	0.879	0.071	1.33498e-38	Plet1
6a. Duct	4.1304e-42	0.68348	0.455	0.006	5.84245e-38	Clmn
6a. Duct	6.32414e-42	0.934348	0.545	0.016	8.9455e-38	RP23-349B9.1
6a. Duct	1.24563e-41	1.25746	0.758	0.045	1.76195e-37	Gsta3
6a. Duct	1.89578e-41	1.62627	0.758	0.047	2.68158e-37	Fgfbp1
6a. Duct	2.12792e-41	2.27338	0.97	0.104	3.00994e-37	Cldn3
6a. Duct	6.21704e-41	2.81925	1	0.127	8.79401e-37	Epcam
6a. Duct	1.69128e-40	0.878511	0.636	0.029	2.39232e-36	Bex4
6a. Duct	5.9614e-39	1.36435	0.758	0.053	8.4324e-35	Rab25
6a. Duct	1.70073e-38	2.03131	0.818	0.071	2.40569e-34	Barx2
6b. Differentiating acinar	7.27383e-45	3.33685	0.593	0.016	1.02888e-40	RP23-232N16.1
6b. Differentiating acinar	5.68412e-42	4.6168	0.778	0.05	8.04019e-38	Pip
6b. Differentiating acinar	1.82636e-26	3.38	0.333	0.008	2.58338e-22	Scgb2b4-ps
6b. Differentiating acinar	9.92966e-25	4.20961	0.37	0.014	1.40455e-20	Fgg
6b. Differentiating acinar	1.24784e-22	3.95956	0.778	0.125	1.76507e-18	Esp6
6b. Differentiating acinar	3.03178e-22	4.81507	0.444	0.03	4.28845e-18	Mucl2
6b. Differentiating acinar	4.72058e-21	5.65879	0.593	0.071	6.67727e-17	Scgb2b2
6b. Differentiating acinar	6.74232e-21	3.81444	0.296	0.01	9.53701e-17	Scgb1b7
6b. Differentiating acinar	3.4751e-20	3.64144	0.852	0.183	4.91552e-16	Phyh
6b. Differentiating acinar	3.18611e-18	3.23605	0.519	0.06	4.50675e-14	RP23-214M22.3
6b. Differentiating acinar	4.25146e-17	2.62258	0.37	0.028	6.01369e-13	Sbp
6b. Differentiating acinar	6.2967e-17	2.23336	0.815	0.185	8.90668e-13	Spint2
6b. Differentiating acinar	3.74841e-16	1.12077	0.63	0.107	5.30213e-12	Kcnn4
6b. Differentiating acinar	3.43696e-14	2.06748	0.333	0.028	4.86158e-10	Hp
6b. Differentiating acinar	3.85251e-13	1.50132	0.926	0.292	5.44937e-09	Krt18
6b. Differentiating acinar	9.57048e-13	2.18208	0.556	0.111	1.35374e-08	Aqp5
6b. Differentiating acinar	2.24862e-12	1.62715	0.63	0.133	3.18068e-08	Cldn3
6b. Differentiating acinar	2.92752e-12	1.58306	0.407	0.056	4.14098e-08	Ppp1r1b
6b. Differentiating acinar	3.84682e-12	5.45647	0.296	0.028	5.44133e-08	Scgb2a2
6b. Differentiating acinar	1.01616e-11	0.584326	0.259	0.02	1.43737e-07	Sftpc
6b. Differentiating acinar	1.64811e-11	1.43887	0.667	0.155	2.33125e-07	Epcam
6b. Differentiating acinar	3.05749e-11	2.69777	0.63	0.167	4.32482e-07	Cldn10
6b. Differentiating acinar	5.82257e-11	1.39814	0.296	0.032	8.23602e-07	AC084109.5
6b. Differentiating acinar	6.57267e-11	0.924089	0.333	0.04	9.29704e-07	Tspan1
6b. Differentiating acinar	8.25153e-11	1.94741	0.593	0.147	1.16718e-06	Chchd10
6c. Undifferentiated epithelial	3.33711e-10	2.10497	0.727	0.298	4.72034e-06	Krt18
6c. Undifferentiated epithelial	5.94577e-08	2.43115	0.485	0.153	0.00084103	Wfdc18
6c. Undifferentiated epithelial	1.12341e-06	1.97495	0.091	0.624	0.0158906	Npc2
6c. Undifferentiated epithelial	5.24171e-06	1.11262	0.909	0.922	0.074144	H3f3b
6c. Undifferentiated epithelial	9.10135e-06	0.852279	0.879	0.951	0.128739	Rplp0
6c. Undifferentiated epithelial	1.04839e-05	2.26215	0.455	0.19	0.148294	Krt8
6c. Undifferentiated epithelial	1.184e-05	1.01939	0.879	0.835	0.167477	Ptma
6c. Undifferentiated epithelial	2.97769e-05	0.655436	0.879	0.91	0.421194	Rpl3
6c. Undifferentiated epithelial	6.95122e-05	0.650116	0.879	0.914	0.98325	Rpl13a
6c. Undifferentiated epithelial	9.72898e-05	0.36416	0.091	0.508	1	Rpl19-ps11
6c. Undifferentiated epithelial	0.000178999	0.67876	0.152	0.614	1	mt-Cytb
6c. Undifferentiated epithelial	0.000258399	1.15926	0.758	0.806	1	Slc25a5
6c. Undifferentiated epithelial	0.000624384	0.351094	0.152	0.561	1	Srsf5
6c. Undifferentiated epithelial	0.00062461	0.636866	0.061	0.373	1	Tomm22
6c. Undifferentiated epithelial	0.000801295	0.829984	0.727	0.837	1	Rplp2
6c. Undifferentiated epithelial	0.000828759	0.355256	0.152	0.561	1	Ndufa8
6c. Undifferentiated epithelial	0.000912783	0.656599	0.061	0.38	1	Ddah2
6c. Undifferentiated epithelial	0.00115251	0.667389	0.848	0.906	1	Rpl14
6c. Undifferentiated epithelial	0.00122379	0.437701	0.121	0.461	1	RP24-257C17.2
6c. Undifferentiated epithelial	0.00124586	1.88572	0.364	0.18	1	Cldn10
6c. Undifferentiated epithelial	0.00160919	0.3443	0.182	0.578	1	Rbbp7
6c. Undifferentiated epithelial	0.00164475	0.579321	0.091	0.408	1	Mrpl14
6c. Undifferentiated epithelial	0.00170634	0.660743	0.152	0.539	1	RP23-298F22.4
6c. Undifferentiated epithelial	0.00171911	0.36846	0.091	0.414	1	P4hb
6c. Undifferentiated epithelial	0.00188693	0.441511	0.212	0.606	1	RP23-180N22.1
6d. Proliferating epithelial	1.37781e-15	1.73397	0.588	0.065	1.94892e-11	Plk1
6d. Proliferating epithelial	1.80156e-15	1.696	0.765	0.115	2.54831e-11	Nusap1
6d. Proliferating epithelial	2.2897e-15	1.78038	0.706	0.095	3.23878e-11	Crabp2
6d. Proliferating epithelial	2.36701e-14	2.247	0.706	0.111	3.34813e-10	Cdc20
6d. Proliferating epithelial	3.42023e-14	1.4307	0.529	0.057	4.83792e-10	Shcbp1
6d. Proliferating epithelial	6.64842e-14	1.68316	0.588	0.075	9.40419e-10	Ccna2
6d. Proliferating epithelial	6.99064e-14	2.10167	0.882	0.174	9.88826e-10	Pclaf
6d. Proliferating epithelial	5.30631e-12	1.18979	0.824	0.166	7.50577e-08	Acot1
6d. Proliferating epithelial	6.84816e-12	1.62982	0.941	0.247	9.68672e-08	Gm26623
6d. Proliferating epithelial	1.72275e-11	1.59625	0.529	0.075	2.43683e-07	Gsta3
6d. Proliferating epithelial	3.20599e-11	1.73336	0.706	0.15	4.53487e-07	Spc24
6d. Proliferating epithelial	6.86181e-11	1.89981	1	0.383	9.70602e-07	Hmgb2
6d. Proliferating epithelial	1.28307e-10	0.575336	0.294	0.022	1.8149e-06	Gtpbp10
6d. Proliferating epithelial	1.55688e-10	1.52668	0.824	0.186	2.20221e-06	Krt8
6d. Proliferating epithelial	2.31672e-10	1.8011	0.765	0.202	3.277e-06	Hmgb3
6d. Proliferating epithelial	3.29939e-10	1.46017	1	0.302	4.66698e-06	Krt18
6d. Proliferating epithelial	3.34755e-10	1.93367	0.765	0.198	4.73511e-06	RP23-233O21.5
6d. Proliferating epithelial	3.96773e-10	1.78415	1	0.832	5.61236e-06	Ptma
6d. Proliferating epithelial	4.94393e-10	1.35376	0.647	0.125	6.9932e-06	Cdca8
6d. Proliferating epithelial	6.73985e-10	1.52338	0.647	0.128	9.53352e-06	Cited4
6d. Proliferating epithelial	6.76423e-10	1.31798	0.471	0.067	9.568e-06	Fbxo5
6d. Proliferating epithelial	7.89565e-10	1.41573	0.588	0.107	1.11684e-05	Ccnb1
6d. Proliferating epithelial	7.92871e-10	1.08045	0.412	0.051	1.12152e-05	Melk
6d. Proliferating epithelial	1.27807e-09	1.93481	0.941	0.391	1.80783e-05	Mif
6d. Proliferating epithelial	3.80819e-09	1.32415	0.529	0.095	5.38669e-05	Tacc3
7a. Dcpp+ epithelial	1.3642e-52	0.418724	0.6	0.002	1.92966e-48	Igsf5
7a. Dcpp+ epithelial	8.62903e-42	1.93883	0.8	0.01	1.22058e-37	Dmbt1
7a. Dcpp+ epithelial	5.59055e-37	0.405858	0.8	0.012	7.90783e-33	Gjb1
7a. Dcpp+ epithelial	2.32635e-30	1.1284	0.6	0.008	3.29062e-26	Kcne1
7a. Dcpp+ epithelial	1.40628e-28	3.08023	1	0.031	1.98918e-24	Scgb2b27
7a. Dcpp+ epithelial	5.56341e-24	0.480989	0.4	0.004	7.86945e-20	B3gnt6
7a. Dcpp+ epithelial	6.80019e-24	0.346867	0.4	0.004	9.61887e-20	Lmod2
7a. Dcpp+ epithelial	1.4221e-19	2.71551	0.4	0.006	2.01156e-15	Wfdc12
7a. Dcpp+ epithelial	2.47657e-19	0.529065	0.8	0.029	3.50311e-15	Oit1
7a. Dcpp+ epithelial	5.67531e-18	0.856474	0.6	0.017	8.02773e-14	Gjb2
7a. Dcpp+ epithelial	8.41269e-18	2.18158	0.8	0.033	1.18998e-13	Bglap3
7a. Dcpp+ epithelial	1.53794e-17	0.415835	0.6	0.017	2.17541e-13	Tc2n
7a. Dcpp+ epithelial	2.14798e-16	1.74619	0.4	0.008	3.03832e-12	Muc19
7a. Dcpp+ epithelial	3.1365e-16	8.40567	1	0.071	4.43658e-12	Dcpp3
7a. Dcpp+ epithelial	4.19086e-16	0.357606	0.4	0.008	5.92797e-12	RP23-432F6.4
7a. Dcpp+ epithelial	1.82619e-14	2.73515	1	0.075	2.58315e-10	RP23-214M22.3
7a. Dcpp+ epithelial	1.89398e-14	0.443492	0.8	0.041	2.67903e-10	Hivep3
7a. Dcpp+ epithelial	2.28406e-13	0.595811	0.6	0.025	3.2308e-09	Spdef
7a. Dcpp+ epithelial	3.48168e-13	0.482171	0.8	0.044	4.92484e-09	St3gal1
7a. Dcpp+ epithelial	7.54096e-13	0.586481	0.8	0.046	1.06667e-08	Slc39a11
7a. Dcpp+ epithelial	3.10418e-12	0.324831	0.4	0.012	4.39087e-08	Braf
7a. Dcpp+ epithelial	8.33764e-12	1.07812	0.8	0.054	1.17936e-07	Folr1
7a. Dcpp+ epithelial	1.0266e-11	0.33622	0.6	0.029	1.45213e-07	Ahctf1
7a. Dcpp+ epithelial	3.86023e-11	0.37609	0.6	0.031	5.4603e-07	Galnt3
7a. Dcpp+ epithelial	4.48624e-11	0.525558	0.4	0.014	6.34578e-07	Krt79
7b. Erythroid	1.24615e-55	9.38693	1	0.054	1.76268e-51	Hba-a2
7b. Erythroid	3.49902e-55	3.8355	1	0.054	4.94936e-51	Snca
7b. Erythroid	1.22738e-43	1.36	0.455	0.004	1.73612e-39	Trim10
7b. Erythroid	1.58276e-43	1.49741	0.682	0.024	2.23881e-39	Isg20
7b. Erythroid	2.90589e-40	3.47564	1	0.094	4.11038e-36	Bpgm
7b. Erythroid	2.92753e-35	1.43481	0.409	0.006	4.14099e-31	Gypa
7b. Erythroid	7.8197e-32	0.916548	0.273	0	1.1061e-27	Hbq1b
7b. Erythroid	9.99552e-28	0.839664	0.409	0.012	1.41387e-23	Slc4a1
7b. Erythroid	9.19725e-24	3.15707	1	0.232	1.30095e-19	Fech
7b. Erythroid	1.10339e-23	0.510693	0.273	0.004	1.56074e-19	Rhd
7b. Erythroid	2.80591e-23	3.25473	1	0.24	3.96895e-19	Mkrn1
7b. Erythroid	8.8747e-22	2.15377	0.727	0.084	1.25533e-17	Car2
7b. Erythroid	9.16744e-22	1.77394	0.773	0.102	1.29673e-17	Fam213a
7b. Erythroid	1.7231e-21	0.832239	0.409	0.02	2.43732e-17	Dhrs11
7b. Erythroid	4.35729e-21	8.38294	1	0.309	6.16338e-17	Hbb-bt
7b. Erythroid	1.36431e-20	1.80886	0.818	0.132	1.92982e-16	Fam220a
7b. Erythroid	2.0352e-19	0.786382	0.318	0.012	2.87879e-15	Rsad2
7b. Erythroid	4.4622e-19	1.08615	0.773	0.112	6.31178e-15	Alas2
7b. Erythroid	6.44968e-16	9.23095	1	0.663	9.12307e-12	Hba-a1
7b. Erythroid	1.54203e-15	8.62579	1	0.794	2.18121e-11	Hbb-bs
7b. Erythroid	2.38222e-15	1.44594	0.636	0.1	3.36965e-11	Dcaf12
7b. Erythroid	1.85908e-13	1.78683	0.955	0.431	2.62967e-09	Bnip3l
7b. Erythroid	4.65561e-13	1.37226	0.364	0.034	6.58536e-09	Pnpo
7b. Erythroid	1.06062e-11	1.85759	1	0.521	1.50025e-07	Gpx1
7b. Erythroid	6.93758e-11	0.820401	0.364	0.042	9.81321e-07	St3gal5
