# Supplementary material for: The First Transcriptomic Atlas of the Adult Lacrimal Gland Reveals Epithelial Complexity and Identifies Novel Progenitor Cells in Mice
Source: Cells. 2023 May 21;12(10):1435. doi: 10.3390/cells12101435 (PMC10216974; doi:10.3390/cells12101435)
Supplement: Supplementary file 1 [file cells-12-01435-s001.zip › Table S6 - Analysis of tear components.xlsx]

## Sheet: Protein-Gene correspondence
	Tear proteome data (Stopkova et al.), n=6						scRNAseq data - LG epithelium
PROTEIN SYMBOLS	Mean (FEMALES)	Mean (MALES)	Log2 mean	FOLD DIFFERENCE	p-value	UNIPROT	Gene name	mRNA (avg expression)
OBP7	3.82871e+09	1678247500	31.3586	1.1899	0.00688797	KJ605394	Obp1b	104.679
OBP5	3.35148e+09	1.91992e+09	31.2955	0.803752	0.0222822	KJ605392	Obp1a	835.279
LACREIN	2.25232e+09	2.08933e+09	31.0156	0.10837	0.410705	Q66VB7	Gm1553	764.201
SCGB1B2	2.25214e+09	2.07625e+09	31.0112	0.117317	0.384108	O35176	Scgb1b2	521.054
K2C1b	1.91879e+09	1.51639e+09	30.6777	0.339561	0.109353	P04264	Krt1	0.0253196
TRYP	1.59167e+09	1.18166e+09	30.369	0.429724	0.0794938	P00761	Tryp	#N/A
K1C10	1202897500	973555000	30.0193	0.305179	0.15117	P13645	Krt10	0.127948
SVAL2	1285305000	831577500	29.9793	0.628188	0.0450373	D3Z4E7	Sval2	20.5713
SCGB2B2	1.09336e+09	9.38376e+08	29.9201	0.220532	0.236448	G5E8B4	Scgb2b2	613.271
OBP1	978355000	9.16739e+08	29.8196	0.0938467	0.503469	KJ605390	Gm14744	#N/A
LCN11	1.02697e+09	6.82543e+08	29.6709	0.5894	0.0539668	A2BHR2	Lcn11	18.81
K1C9	921642500	6.20729e+08	29.5225	0.570243	0.0593693	P35527	Krt9	#N/A
K22Ea	8.46743e+08	6.65657e+08	8.3e-06	0.347146	0.139104	P35908	Krt2	#N/A
PIP	8.96349e+08	458410250	29.3354	0.967422	0.0262407	P02816	Pip	126.432
MUP1_2_8_9_10_11_12_14_15_16_18_19	5.26499e+08	748140000	29.2474	-0.506877	0.0777676	P11588	Mup1	#N/A
LPO	6.44957e+08	506710000	29.1011	0.348042	0.149353	Q5SW46	Lpo	5.92964
SCGB1B3	6.59982e+07	6.35908e+08	28.3867	-3.26832	0.000240664	J3QJY4	Scgb1b3	55.0277
CAH6	2.28755e+08	4.07308e+08	28.2446	-0.83232	0.0422988	P18761	Car6	17.0358
Gm5097_LIPO1	209921400	3.57768e+08	28.0805	-0.769175	0.0499253	J3QME6	Lipo1	5.53051
SCGB1B20_SCGB1B29	145001450	4.21775e+08	28.0782	-1.54041	0.0151535	E9PWZ2_D2XZ31	Scgb1b20_Scgb1b29	206.835252932472_0.0357663985506625
ESP6	217777500	3.34739e+08	28.0414	-0.620182	0.0734523	A8R0U0	Esp6	81.8636
DNAS1	4.96748e+08	54751250	28.0388	3.18155	0.000497925	P49183	Dnase1	14.6672
SCGB2B7_SCGB2B20	6.18585e+07	4.86733e+08	28.0312	-2.97609	0.000987552	D3YYY1_S2B20	Scgb2b7_Scgb2b20	132.544566073116_160.563520127333
ACTB	2.69543e+08	257205000	27.9725	0.0675985	0.650797	P60710	Actb	15.6341
K2C5b	2.81242e+08	242670250	27.9648	0.212817	0.322846	Q922U2	Krt5	3.20967
MUP4	5342525	4.38729e+08	27.7262	-6.35966	8.3e-06	P11590	Mup4	83.5028
K1C14a	2.05384e+08	1.89603e+08	27.5572	0.115342	0.531261	P02533	Krt14	7.37875
TRFL	9.91417e+07	266195000	27.4447	-1.42492	0.0215519	P08071	Ltf	16.3618
KRT12	1.74544e+08	156758500	27.3036	0.155044	0.450307	Z4YJD9	Krt12	#N/A
GSTO1	1.69667e+08	143983000	27.2246	0.236806	0.3201	O09131	Gsto1	0.72267
K2C6Ab	155826250	1.29564e+08	27.0884	0.266272	0.290066	P50446	Krt6a	0.000642926
AL3A1	148857750	1.29572e+08	27.0527	0.200179	0.381834	P47739	Aldh3a1	0.228257
SCGB2A2	10430525	2.64052e+08	27.0321	-4.66194	0.000423237	J3KMP9	Scgb2a2	2.15339
K1C15	137999200	114904750	26.914	0.264221	0.300066	Q61414	Krt15	0.345379
SCGB2B24	1.11133e+08	1.28533e+08	26.8364	-0.20985	0.384755	Q7M747	Scgb2b24	397.486
SCGB2B3	3.04196e+07	1.70485e+08	26.5819	-2.48657	0.0080166	D2XZ38	Scgb2b3	2.53489
UB2Q1	1.14903e+08	8.58174e+07	26.5806	0.421077	0.182207	Q7TSS2	Ube2q1	0.154751
HPT	7.25342e+07	1.10212e+08	26.4453	-0.603551	0.111046	Q61646	Hp	3.54185
IGHAb	3.93839e+07	1.34854e+08	26.3765	-1.77572	0.019917	P01878	Igha	0.136162
APRV1	80836000	78929250	26.2514	0.0344379	0.792606	Q09PK2	Asprv1	1.16345e-16
PIGR	28478750	126766250	26.21	-2.15421	0.0137344	O70570	Pigr	0.946887
K1C13	7.36404e+07	73450250	26.1321	0.00373023	0.892755	P08730	Krt13	#N/A
SCGB1B19	0	1.29119e+08	25.9441	-26.9441	0.000473029	F6WYW0	Scgb1b19	0.00743788
OBP6	65435300	56777925	25.8648	0.204739	0.4259	KJ605393	Obp6	#N/A
ANXA2	6.38202e+07	50449250	25.7679	0.33918	0.272133	P07356	Anxa2	1.40545
TKT	5.89857e+07	4.32387e+07	25.6072	0.448042	0.200946	P40142	Tkt	0.906453
K2C4	6.01588e+07	3.49582e+07	25.5032	0.783144	0.0868963	P07744	Krt4	0
K2C6Aa	50223250	42851250	25.4719	0.229018	0.407842	P02538	Krt6a	0.000642926
ALBUa	4.89867e+07	4.13706e+07	25.4291	0.243784	0.387411	P02768	Alb	#N/A
Gm12886	5.92002e+07	2.90874e+07	25.3957	1.02521	0.0578589	B1AZM5	Gm12886	1.12029
CALL3	4.06163e+07	4.69806e+07	25.3844	-0.210005	0.447361	Q9D6P8	Calml3	0.0847066
ESP1	0	8.64087e+07	25.3647	-26.3647	0.00128631	Q3LHH8	Esp1	0.0274013
K2C5a	4.69956e+07	38845750	25.3552	0.274768	0.355444	P13647	Krt5	3.20967
SCGB1B24_SCGB1B20	1.34705e+07	7.05429e+07	25.3241	-2.3887	0.0158423	B1B0N6	Scgb1b24	10.66
IGKC	17299500	64981750	25.2941	-1.9093	0.0245477	P01837	Igkc	0.38954
MUP5	1.7831e+07	63793750	25.2825	-1.83903	0.0261245	P11591	Mup5	0.102058
TBB4B	3.93971e+07	3.74804e+07	25.1961	0.0719518	0.711004	P68372	Tubb4b	0.805599
MFGM	40738000	3.44238e+07	25.1635	0.242967	0.401361	P21956	Mfge8	1.55031
HSPB1	3.34876e+07	3.98771e+07	25.1286	-0.251934	0.400465	P14602	Hspb1	3.48298
ALBUc	3.10903e+07	41557750	25.1144	-0.418651	0.241568	P07724	Alb	#N/A
MCG140784	3.86372e+07	3.30066e+07	25.0943	0.227235	0.425402	Q792Z1	Try10	#N/A
TBA1A	36366750	3.39863e+07	25.0681	0.0976653	0.654581	P68369	Tuba1a	0.169282
CYT_AP5	0	6.93155e+07	25.0467	-26.0467	0.00215768	Q6IE35	Gm1330	#N/A
ALBUb	34055500	3.19902e+07	24.977	0.0902593	0.673228	P02769	Alb	#N/A
AHNAK	36036675	2.96314e+07	24.9687	0.282338	0.361635	E9Q616	Ahnak	1.38143
MBP	3.31478e+07	3.11797e+07	24.9389	0.0883091	0.679618	F7A0B0	Mbp	0.139048
K1C16	30574250	2.92788e+07	24.8349	0.062459	0.742166	P08779	Krt16	0.00189654
K1C19	2.83984e+07	3.1377e+07	24.833	-0.1439	0.581212	P19001	Krt19	0.222576
HORNa	32097000	27077750	24.8185	0.245331	0.41317	Q86YZ3	Hrnr	#N/A
EGFB2	5.84412e+07	227034	24.8061	8.00793	0.00244813	P36368	Egfbp2	#N/A
MUP17_13	2.47859e+07	3.25828e+07	24.7738	-0.394591	0.273195	B5X0G2_A2CEK6	Mup17/Mup13	0.00025879
ACTN4	3.03472e+07	24204250	24.7011	0.326301	0.326805	P57780	Actn4	0.970217
ESP18	1.28314e+07	4.12186e+07	24.6878	-1.68362	0.0332199	A8R0V1	Esp18	25.0441
NUCB1	17790225	3.49283e+07	24.6518	-0.973313	0.075112	Q02819	Nucb1	0.408833
H4	25163250	27266250	24.6439	-0.115798	0.640888	P62806	H4c1	#N/A
TPM1	37120075	14575125	24.6235	1.34869	0.0444066	Q8BSH3	Tpm1	2.67225
E9PZ00	3.69146e+07	14758875	24.6229	1.32261	0.0455851	E9PZ00	Psap	1.29546
PPL	27002000	2.40473e+07	24.6054	0.167194	0.536058	G5E898	Ppl	0.138455
LACB	3.00208e+07	2.08503e+07	24.6003	0.525894	0.194432	P02754	Lgb	#N/A
K1C14b	2.26097e+07	2.81909e+07	24.5983	-0.318286	0.348763	Q61781	Krt14	7.37875
AGR2	2.34391e+07	2.69609e+07	24.5869	-0.201953	0.491527	O88312	Agr2	3.31682
HS71B	29716500	2.03841e+07	24.5783	0.543821	0.185884	P17879	Hspa1b	3.63961
HBB1	18233575	3.16559e+07	24.5722	-0.795878	0.107801	P02088	Hbb-b1	#N/A
ANXA1	28872975	2.06737e+07	24.5623	0.481925	0.217245	P10107	Anxa1	1.64822
IGHAa	2.96274e+07	18300175	24.5144	0.695073	0.133203	A0A075B6A3	Igha	0.136162
IGJ	8902825	3.79344e+07	24.4812	-2.09117	0.0263237	E9PWK4_P01592	Jchain	0.054296
EF1A1	2.55223e+07	2.10098e+07	24.4717	0.280696	0.383917	P10126	Eef1a1	13.3182
LIPO2	1.93921e+07	2.65097e+07	24.452	-0.451051	0.246656	D3YY49	Lipo2	0.00562002
1433S	2.36631e+07	2.07898e+07	24.4058	0.186762	0.51317	O70456	Sfn	1.37921
MUC5A	5.20041e+06	3.73367e+07	24.3422	-2.8439	0.0166307	E9PWB6	Muc5ac	#N/A
KLK1B9	4.21739e+07	67365	24.3321	9.29011	0.0033361	P15949	Klk1b9	0
KLK1B8	4.17803e+07	374467	24.3292	6.80184	0.00431535	P07628	Klk1b8	#N/A
ATPB	2.00768e+07	2.06004e+07	24.2777	-0.0371383	0.821535	P56480	Atp5f1b	#N/A
RENI2	4.05219e+07	0	24.2722	25.2722	0.00348548	P00796	Ren2	#N/A
GSTA4	1.85402e+07	21134850	24.2417	-0.18897	0.527618	P24472	Gsta4	0.514103
K2C1a	1.53311e+07	23756575	24.2202	-0.631865	0.165793	P04104	Krt1	0.0253196
SCGB2B20	3.82143e+07	0	24.1876	25.1876	0.00386722	J3QK77	Scgb2b20	160.564
HS90B	18456500	18684325	24.1465	-0.0176995	0.870357	P11499	Hsp90ab1	7.40294
KRT10	1.33202e+07	23096975	24.1181	-0.794085	0.119046	A2A513	Krt10	0.127948
GRP78	2.12461e+07	1.50141e+07	24.1119	0.50088	0.223992	P20029	Hspa5	3.05969
DESP	19964250	1.57918e+07	24.0917	0.338245	0.343444	E9Q557	Dsp	1.71608
PPIA	1.97837e+07	1.58641e+07	24.0873	0.318541	0.360863	P17742	Ppia	8.77305
ESP38	1777775	3.22202e+07	24.0189	-4.17982	0.00974274	A8R0X1	Esp38	0.225247
CASA1a	27224875	6.73368e+06	24.0173	2.01546	0.0285062	P02662	Csn1s1	#N/A
K22Ob	2.42727e+07	9.06758e+06	23.9908	1.42054	0.0477842	Q3UV17	Krt76	#N/A
HBA-A1	1.23195e+07	2.03202e+07	23.9601	-0.721967	0.144332	Q91VB8	Hba-a1	0.00216871
ACTS	1.57311e+07	1.57622e+07	23.9085	-0.00284783	0.908896	P68134	Acta1	0.00131083
1433Z	1.53326e+07	1.52598e+07	23.8667	0.00686316	0.887734	P63101	Ywhaz	1.33789
NUCB2	11006950	1.93816e+07	23.857	-0.816273	0.121004	Q3UKN6	Nucb2	0.55045
Gm3839_G3P	1.56859e+07	1.45687e+07	23.8507	0.106594	0.669959	S4R1W1_P16858	Gm3839/Gapdh	#N/A/1.98971731996729
HSP7C	1.51224e+07	15115975	23.8499	0.000616263	0.903759	P63017	Hspa8	3.63916
FCGBP	1.60331e+07	13493000	23.8155	0.248841	0.449593	E9Q9C6	Fcgbp	0.99423
QSOX1	1.15313e+07	17620750	23.7971	-0.611718	0.186207	Q8BND5	Qsox1	1.27221
TGM2	1.23591e+07	1.67703e+07	23.796	-0.440332	0.279461	P21981	Tgm2	0.766806
CO1A1	1.44767e+07	1.39105e+07	23.7587	0.0575533	0.772689	P11087	Col1a1	3.79072e-05
PRDX6	1.55415e+07	1.24779e+07	23.7399	0.316749	0.376174	O08709	Prdx6	0.83372
UBA52	16136000	1.18284e+07	23.7371	0.448033	0.270697	E9Q9J0	Uba52	0.4148
PLAK	15333825	1.14002e+07	23.6722	0.427654	0.285477	Q02257	Jup	0.598057
KPYM	1.40323e+07	11815050	23.6235	0.248124	0.457768	P52480	Pkm	1.00986
FBX50	13284275	12348400	23.6115	0.105395	0.679593	G3X9C2	Nccrp1	0.000843525
MUC4	1.41202e+07	1.1282e+07	23.5984	0.323745	0.375402	E9Q7Q	Muc4	0.000872545
EVPL	1.36726e+07	1.1642e+07	23.5935	0.231953	0.479228	Q9D952	Evpl	0.0345598
TCO2	1.34031e+07	1.18512e+07	23.59	0.177528	0.556938	O88968	Tcn2	0.541035
HIST2H2BB_H2B1P	1.10993e+07	12463175	23.49	-0.167207	0.589311	G3X9D5_Q8CGP2	Hist2h2bb/Hist1h2bp	0.00587666547822581/0.00180202511489615
BPIFA6	21942150	1281200	23.4691	4.09814	0.0123071	Q0VGU8	Bpifa6	8.86877e-05
ENOA	1.24329e+07	1.06868e+07	23.4626	0.218334	0.504133	P17182	Eno1	0.344732
ATPA	1.12597e+07	1.14048e+07	23.4339	-0.0184685	0.872423	Q03265	Atp5f1a	#N/A
FILA2	1.24419e+07	1.0072e+07	23.4243	0.304861	0.403187	Q5D862	Flg2	#N/A
FURIN	17744875	4.02646e+06	23.3759	2.13982	0.0313278	P23188	Furin	0.715603
H2AFZ	1.1796e+07	9.77754e+06	23.3628	0.270752	0.441071	Q3UA95	H2az1	#N/A
ALDOAb	1.20337e+07	9.12821e+06	23.335	0.398676	0.32	P05064	Aldoa	1.70758
OVOS	1.06852e+07	10098900	23.309	0.0814146	0.732689	Q3UU35	Ovos	#N/A
K2C6B	10364975	9934575	23.2749	0.0611865	0.769959	Q9Z331	Krt6b	#N/A
APOE	505417	1.93738e+07	23.2448	-5.26049	0.0102739	P08226	Apoe	20.8039
FETUA	9.96494e+06	9.88958e+06	23.243	0.0109516	0.879917	P12763	Ahsg	#N/A
BPIFB9B	1.13574e+07	8.26942e+06	23.2263	0.457771	0.283054	A2AJD1_Q80XI7	Bpifb9b	#N/A
THIO	8554500	9.45274e+06	23.1021	-0.144049	0.63522	P10639	Txn	#N/A
LIPR1	1.79779e+07	0	23.0997	24.0997	0.00838174	Q5BKQ4	Pnliprp1	1.22189
KLK1B22	1.78657e+07	0	23.0907	24.0907	0.00850622	P15948	Klk1b22	#N/A
DMBT1	1.85406e+06	1.51302e+07	23.0177	-3.02867	0.0224149	E9QPG8	Dmbt1	2.52078
CAPG	9470275	7441825	23.0116	0.34775	0.377751	Q99LB4	Capg	0.729123
TBB5	9.68079e+06	7.17622e+06	23.0068	0.431902	0.312963	P99024	Tubb5	0.509886
CO1A2	8.17058e+06	8592900	22.9988	-0.072706	0.767029	Q01149	Col1a2	0.0324545
HBB2	5.64493e+06	9.92279e+06	22.8921	-0.813789	0.15073	P02089	Hbb-b2	#N/A
K2C7	7208550	8.05982e+06	22.864	-0.161038	0.619195	Q9DCV7	Krt7	1.07529
CYT1	5619125	9.37894e+06	22.8383	-0.73908	0.172938	P35175	Stfa1	#N/A
KT33B	14446610	13709.2	22.7856	10.0413	0.00973444	Q61897	Krt33b	#N/A
AT1A3	6.76557e+06	7.57897e+06	22.774	-0.16379	0.618299	Q6PIC6	Atp1a3	7.73391e-17
CLUS	7.27056e+06	6782750	22.7444	0.100196	0.710315	Q06890	Clu	0.648205
KLK1B5	1.36899e+07	185833	22.7261	6.20295	0.0112282	P15945	Klk1b5	0
K22Eb	7.19786e+06	6.61299e+06	22.7193	0.122265	0.677494	Q3TTY5	Krt2	#N/A
TPIS	7.33121e+06	6356425	22.7064	0.205835	0.549427	P17751	Tpi1	0.856618
TPM2	1.02308e+07	3.21789e+06	22.681	1.66873	0.0500332	A2AIM4	Tpm2	6.55774
PDIA3	7565150	5.82919e+06	22.6751	0.376073	0.367602	P27773	Pdia3	1.34944
KLK1B16	1.25966e+07	182442	22.6073	6.10945	0.0123817	P04071	Klk1b16	0
DEST	6800275	5.63176e+06	22.5676	0.272008	0.472598	Q9R0P5	Dstn	4.13006
K2C1Bb	6.59033e+06	5509125	22.5284	0.258528	0.490324	Q7Z794	Krt77	0.000658976
PGK1	6380575	5.63593e+06	22.5185	0.179032	0.592797	P09411	Pgk1	0.337108
A630073D07Rik	8.70171e+06	3.12141e+06	22.4951	1.4791	0.0634025	E9PWS6	A630073D07Rik	0.103452
Ighv1-31	701323	10773725	22.452	-3.94129	0.0199004	A0A075B5V1	Ighv1-31	#N/A
LDHA	5.66846e+06	5473000	22.4094	0.0506245	0.804515	P06151	Ldha	0.92133
1433E	5.84269e+06	5178200	22.3937	0.174182	0.60361	P62259	Ywhae	1.19483
ESP15	3.66692e+06	7.27917e+06	22.3839	-0.989206	0.129062	A8R0U8	Esp15	44.3398
VIME	5562725	5.37539e+06	22.3829	0.0494219	0.806805	P20152	Vim	0.095777
CUZD1	0	10894055	22.377	-23.377	0.013112	B2RU69	Cuzd1	0.00234907
Igkv1-122	556758	1.01383e+07	22.3504	-4.18662	0.0198506	A0A087WNI1	Igkv1-122	#N/A
PDIA1	5.42554e+06	5.07649e+06	22.3242	0.0959354	0.727469	P09103	P4hb	2.90225
Gm12887	0	1.04531e+07	22.3174	-23.3174	0.0133527	B1AVM1	Gm12887	0.0544001
BPIFA2	1.84971e+06	8.44494e+06	22.2954	-2.19079	0.0383734	B7ZCG3_P07743	Bpifa2	#N/A
MYL6	5.02368e+06	5.15823e+06	22.2795	-0.0381315	0.840448	Q60605	Myl6	8.02138
K1C17a	5.76068e+06	4197950	22.2475	0.456555	0.32361	Q04695	Krt17	3.64596
PRDX1	5501650	4.43909e+06	22.2449	0.3096	0.44571	B1AXW5	Prdx1	4.17416
SCGB1B27	5.35382e+06	4459350	22.2263	0.263734	0.496647	Q91WB5	Scgb1b27	0.143923
K2C78	5.84707e+06	3.86549e+06	22.2114	0.597063	0.248697	Q8N1N4-2	Krt78	#N/A
CALR	4181250	5.04913e+06	22.138	-0.272101	0.501651	P14211	Calr	2.99633
Gm6619_APOA	6.54199e+06	2.58389e+06	22.1215	1.34018	0.0810207	F6URP1	Gm6619	#N/A
S10AA	5.27494e+06	3.84113e+06	22.12	0.457623	0.334174	P08207	S100a10	3.72531
KRT81	9.04561e+06	0	22.1088	23.1088	0.0140498	Q9ERE2	Krt81	#N/A
MYPR	4282075	4.69517e+06	22.0978	-0.132866	0.697245	P60202	Plp1	0.0391867
DCPP1	6988975	1.85483e+06	22.0762	1.91379	0.0485975	L7N1X9	Dcpp1	0.513677
SPTN1	4.36957e+06	4.29107e+06	22.046	0.0261539	0.85361	P16546	Sptan1	0.392317
KLK1B3	8.52276e+06	0	22.0229	23.0229	0.0143651	P00756	Klk1b3	0
TPM3	4192375	4.28261e+06	22.0148	-0.030722	0.856946	E9Q7Q3	Tpm3	0.344245
PRDX2	4.32269e+06	4119450	22.0092	0.0694782	0.777925	Q61171	Prdx2	1.28581
ROA2	4.02968e+06	4386500	22.0047	-0.122404	0.703303	O88569	Hnrnpa2b1	1.9134
RINI	3.62528e+06	4.75137e+06	21.9979	-0.390249	0.394407	Q91VI7	Rnh1	0.611006
CATL1	3.34916e+06	4.97644e+06	21.9891	-0.571316	0.275162	P06797	Ctsl	4.19026
PROF1	4.08948e+06	4.09249e+06	21.964	-0.00106089	0.913477	P62962	Pfn1	2.00393
MDHM	3.93522e+06	4.24058e+06	21.9629	-0.10782	0.727046	P08249	Mdh2	0.66924
CATD	4.51098e+06	3648200	21.96	0.306257	0.461544	P18242	Ctsd	1.35171
KT33A	7.84237e+06	0	21.9029	22.9029	0.0156929	Q8K0Y2	Krt33a	#N/A
DNJC3	3.95621e+06	3814125	21.8895	0.0527663	0.806805	Q91YW3	Dnajc3	1.66482
NDKB	4008775	3705575	21.8791	0.113464	0.708805	Q01768	Nme2	3.28358
ESP16	2.56087e+06	4.78567e+06	21.8086	-0.902088	0.162365	A8R0U9	Esp16	20.3791
PEBP1	3540250	3.73602e+06	21.7948	-0.0776496	0.779012	P70296	Pebp1	1.77297
HS90A	3.47114e+06	3.78524e+06	21.7908	-0.124975	0.704664	P07901	Hsp90aa1	2.90021
MDHC	3731575	3521675	21.7902	0.0835229	0.75917	P14152	Mdh1	1.14863
LCN13	4605725	2573625	21.7754	0.839626	0.175203	Q8K1H9	Obp2a	#N/A
EF2	3.72788e+06	3294325	21.7435	0.178374	0.618689	P58252	Eef2	3.262
SPB5	4.07848e+06	2.91282e+06	21.7371	0.485618	0.327037	P70124	Serpinb5	0.347828
K1C13b	3979325	2.96892e+06	21.7282	0.422587	0.385494	P13646-1	Krt13	#N/A
OS9	1.71767e+06	5.06777e+06	21.694	-1.5609	0.0709461	Q8K2C7	Os9	0.694012
TRY1	3277400	3437050	21.6788	-0.0686191	0.796365	P07477	Try10	#N/A
SODC	4.31319e+06	2.34421e+06	21.6665	0.879655	0.169444	P08228	Sod1	0.642865
LMNA	3313150	3.32808e+06	21.663	-0.00648803	0.90434	P48678	Lmna	0.868358
ANXA8	3.69311e+06	2688875	21.6056	0.457833	0.357012	O35640	Anxa8	0.327743
CLH1	3.30753e+06	3.04339e+06	21.5985	0.120076	0.705295	Q68FD5	Cltc	0.493572
CASA2	5015125	1.25069e+06	21.5791	2.00356	0.0500332	P02663	Csn1s1	#N/A
PSCA	2.16158e+06	3.95192e+06	21.5436	-0.870464	0.181759	Q9D7U0	Psca	#N/A
RLA2	3326950	2.72436e+06	21.5288	0.288284	0.504739	P99027	Rplp2	5.94279
SPR1A	3.13811e+06	2873175	21.5192	0.127249	0.697402	Q62266	Sprr1a	0.0720883
CASB	5.16494e+06	656567	21.473	2.97574	0.0334606	P02666	Csn2	#N/A
MCG129038	3.02934e+06	2.77266e+06	21.4681	0.127734	0.706274	G3X9V8	Serpinb3a	#N/A
PGRP1	1.65229e+06	4044925	21.4418	-1.29164	0.103477	O88593	Pglyrp1	0.868808
LAC1	352380	5.20139e+06	21.405	-3.88369	0.0276598	P01843	Pgam1	0.456734
PGAM1	2.88997e+06	2.55657e+06	21.3769	0.176845	0.63156	Q9DBJ1	Csta	#N/A
CYTA	3050075	2384500	21.3737	0.355158	0.43961	P56567	Calm1	3.23268
CALM	3.20086e+06	2130425	21.3461	0.587317	0.293618	P62204	Calm2	2.43828
ADT1	2.81354e+06	2447925	21.327	0.200828	0.60439	P48962	Calm3	0.333728
MYH14	2.51403e+06	2.70657e+06	21.3158	-0.10646	0.744315	K3W4R2	Slc25a4	1.57009
LGALS3	2713775	2.35149e+06	21.2722	0.206725	0.599286	Q8C253	Myh14	0.102173
KCRB	2.15094e+06	2.91246e+06	21.2717	-0.437269	0.395992	Q04447	Lgals3	0.0189065
HVM56	770858	4.28776e+06	21.2703	-2.47568	0.0421577	P18527	Ckb	0.311482
RET2	1.69712e+06	3.34769e+06	21.2664	-0.98008	0.163145	Q08652	Rbp2	0.00207095
A1AT	2.25887e+06	2.77931e+06	21.2645	-0.299127	0.51722	P34955	Serpina1c	#N/A
MUP20	1.84152e+06	3.12172e+06	21.2428	-0.761445	0.220548	Q5FW60	Mup20	#N/A
CLIC1	2.82248e+06	2.07693e+06	21.2242	0.44251	0.377361	Q9Z1Q5	Clic1	1.03701
VDAC1	2.67954e+06	2.14841e+06	21.203	0.318719	0.479494	Q60932	Vdac1	0.633803
ARF1	3.15828e+06	1.62963e+06	21.191	0.954593	0.169095	P84078	Arf1	1.16617
ACTN1	1.21494e+06	3547350	21.1832	-1.54585	0.082083	A1BN54	Actn1	0.644996
WDR1	2.68814e+06	1.94136e+06	21.1424	0.469543	0.368448	O88342	Wdr1	0.303554
KLK1B1	4.58305e+06	0	21.1279	22.1279	0.0201411	P00755	Klk1b1	#N/A
MYH8	2213000	2320375	21.1122	-0.0683545	0.792971	P13542	Myh8	#N/A
ILEUA	2.37872e+06	2.13333e+06	21.1054	0.157074	0.656232	Q9D154	Serpinb1a	0.00396812
GSTA3	2.30008e+06	2.20882e+06	21.1043	0.0584124	0.807087	P30115	Gsta3	3.79393
PPIB	2.35906e+06	2.14061e+06	21.1014	0.14019	0.689477	P24369	Ppib	2.41568
H12	4165725	313008	21.0947	3.73429	0.0306141	P15864	H1-2	#N/A
CASK	4.14482e+06	304123	21.085	3.76858	0.0284979	P02668	Csn3	0.0617593
CRIS1	80719.2	4.33229e+06	21.0733	-5.74606	0.0252863	Q03401	Crisp1	2.29915
PAM	3.26674e+06	997825	21.024	1.71099	0.0740913	E9Q704	Pam	0.818633
CYTB	1.26412e+06	2.96279e+06	21.0112	-1.22883	0.127336	Q62426	Cstb	0.884828
AQP5	1.94238e+06	2.27432e+06	21.0077	-0.227607	0.605768	Q9WTY4	Aqp5	1.43308
CH60	1.78955e+06	2.408e+06	21.0011	-0.42824	0.416083	P63038	Hspd1	0.517727
RSSA	2.28868e+06	1.87131e+06	20.9881	0.29047	0.517253	P14206	Rpsa	6.73499
GDIR1	1.87083e+06	2.27322e+06	20.9826	-0.281054	0.539544	Q99PT1	Arhgdia	0.351735
Igkv8-30	556054	3.51062e+06	20.9554	-2.65843	0.0412697	A0A087WNJ3	Igkv8-30	#N/A
MYL12A_MYL12B	2120225	1.94524e+06	20.955	0.124268	0.714224	Q6ZWQ9_Q3THE2	Myl12a/Myl12b	1.10561000088331/0.923803640593112
CHST1	2196775	1.85199e+06	20.9491	0.246307	0.563386	Q9EQC0	Chst1	0.840425
HEXB	1066895	2.97261e+06	20.9457	-1.47831	0.0914274	P20060	Hexb	0.369873
PLET1	1857850	2122200	20.9244	-0.191927	0.620432	Q8VEN2	Plet1	1.15585
ACON	2.22702e+06	1675750	20.8961	0.410305	0.416232	Q99KI0	Aco2	0.412441
HMGB1	1.96504e+06	1895800	20.8805	0.0517531	0.81956	P63158	Hmgb1	1.787
FILA	2.11143e+06	1726200	20.8718	0.290621	0.521975	P20930	FLG	#N/A
PLEC	2509725	1308575	20.8645	0.939532	0.185178	E9Q3W4	Plec	0.798185
TRFE	2.15086e+06	1.64506e+06	20.856	0.386772	0.442988	Q29443	Trf	0.068054
H15	1.97397e+06	1.69901e+06	20.8085	0.216405	0.602232	P43276	H1-5	#N/A
ALDR	1.95206e+06	1.70299e+06	20.8015	0.196925	0.636349	P45376	Akr1b1	#N/A
ALD1	1553690	2.08361e+06	20.7944	-0.423389	0.430174	P21300	Akr1b7	0.000766387
HNRNPK	1965475	1.63639e+06	20.7803	0.26436	0.55117	B2M1R6	Hnrnpk	1.17061
LYPD2	1.71621e+06	1.85822e+06	20.7693	-0.114694	0.757436	Q9DD23	Lypd2	0.000572374
2210010C04Rik	2103500	1.28883e+06	20.6938	0.706726	0.266888	Q9CPN9	2210010C04Rik	#N/A
LDHB	1530175	1.80552e+06	20.6696	-0.238715	0.618822	D3Z7F0	Ldhb	0.304104
COF1	1.41274e+06	1.92263e+06	20.6694	-0.444586	0.423386	P18760	Cfl1	1.11958
HVM40	119508	3.15191e+06	20.6415	-4.72103	0.0295685	P01810		#N/A
PDXK	1.28041e+06	1.93461e+06	20.6164	-0.595437	0.319759	Q8K183	Pdxk	0.147818
1433G	1.34378e+06	1861790	20.6121	-0.470395	0.39434	P61982	Ywhag	0.173517
ROA1	1.59163e+06	1.61166e+06	20.6111	-0.0180439	0.869378	P49312	Hnrnpa1	0.5688
RPTN	1666650	1.46844e+06	20.5801	0.182665	0.636672	P97347	Rptn	#N/A
ASC	1.79304e+06	1.32607e+06	20.5727	0.43525	0.420871	Q9EPB4	Pycard	0.553522
S10AE	1505550	1566275	20.5507	-0.0570469	0.812232	Q9D2Q8	S100a14	0.069639
IQGA1	1687075	1.36066e+06	20.5393	0.310219	0.507195	Q9JKF1	Iqgap1	0.796677
EZRI	1746675	1290775	20.5344	0.436373	0.421826	P26040	Ezr	0.625744
SCEL	1.48982e+06	1.52734e+06	20.5248	-0.0358896	0.841934	Q9EQG3	Scel	0.0161357
NPM1	1.51423e+06	1.50129e+06	20.524	0.0123832	0.88483	Q9DAY9	Npm1	2.03606
PRDX5	1.08728e+06	1924875	20.5224	-0.824036	0.235718	P99029	Prdx5	1.12251
BASP1	1.47441e+06	1.53195e+06	20.5196	-0.0552378	0.830224	Q91XV3	Basp1	0.00234046
CH10	1330300	1647950	20.506	-0.308921	0.544564	Q64433	Hspe1	1.02754
1433B	1.36669e+06	1.58839e+06	20.4948	-0.216879	0.637535	Q9CQV8	Ywhab	0.577847
CN37	1.58387e+06	1.35199e+06	20.4854	0.228364	0.600979	P16330	Cnp	0.235219
PLST	1.93851e+06	990850	20.4822	0.968208	0.189461	Q99K51	Pls3	0.328358
CYTC	1.23664e+06	1.63506e+06	20.4535	-0.402914	0.46044	P21460	Cst3	1.78969
GSTM1	1635300	1236050	20.4533	0.403818	0.44829	P10649	Gstm1	1.55632
MYH9	1556650	1.30512e+06	20.4485	0.254266	0.587386	Q8VDD5	Myh9	1.15007
Igkv12-44	166506	2691245	20.4464	-4.01462	0.0337261	A0A087WNJ0	Igkv12-44	#N/A
FGFP1	1.01329e+06	1823815	20.436	-0.847918	0.226664	O70514	Fgfbp1	0.760683
CF058	52957.5	2.69663e+06	20.3908	-5.67015	0.0294938	Q8C6C9	Leg1	#N/A
KLK1	2.20967e+06	509310	20.3746	2.11721	0.0642075	P15947	Klk1	0.0140374
Igkv4-61	547164	2.14697e+06	20.3614	-1.97226	0.069195	A0A075B5M2	Igkv4-61	#N/A
CAN1	1195775	1.46252e+06	20.3421	-0.290507	0.569079	O35350	Capn1	0.112183
KCY	1.47484e+06	1.14998e+06	20.3238	0.358947	0.508531	Q9DBP5	Cmpk1	0.222096
KRT84	861108	1.75301e+06	20.3179	-1.02557	0.181519	Q99M73	Krt84	#N/A
K2C80	1.53382e+06	1.05847e+06	20.3058	0.53515	0.375751	Q0VBK2	Krt80	0.0368475
THIM	1.57748e+06	970900	20.2812	0.70023	0.278257	Q8BWT1	Acaa2	0.276208
ADH7	1.25457e+06	1247125	20.2545	0.00858306	0.870224	Q64437	Adh7	0.0956736
PCBP1	1.27383e+06	1188155	20.2314	0.100454	0.76229	P60335	Pcbp1	0.693694
ANXA5	1.40907e+06	1045625	20.2271	0.430374	0.439743	P48036	Anxa5	0.897356
G6PD1	1.27943e+06	1.16557e+06	20.2214	0.134473	0.739253	Q00612	G6pdx	0.0923595
SET	1.52287e+06	899837	20.2082	0.759054	0.264307	A2BE92	Set	0.959377
CYC	1320200	1.09947e+06	20.2064	0.263952	0.560224	P62894	Cycs	0.37404
TRFE_Gm20425	738936	1.61662e+06	20.1676	-1.12946	0.168838	Q921I1_E9Q035	Tf	#N/A
Gm8991_EG627828	1362525	972350	20.1549	0.486735	0.406008	E9Q7H5_B2RXM2	Gm6793	#N/A
MYL1	1.34188e+06	991872	20.1542	0.436026	0.441668	E9PWG4	Myl1	0.000630782
CAP1	1336300	930983	20.1125	0.521416	0.399485	P40124	Cap1	0.13252
AL1A1	1.56722e+06	667550	20.0917	1.23126	0.1519	P24549	Aldh1a1	0.0737541
GDIB	1184550	930692	20.0124	0.347964	0.521627	Q61598	Gdi2	0.706482
FABP5	1.70187e+06	394267	19.9993	2.10987	0.0744315	Q05816	Fabp5	1.09254
GDIR2	1.05394e+06	1.00385e+06	19.9727	0.0702453	0.805054	Q61599	Arhgdib	0.371955
SH3L3	743975	1.30417e+06	19.9659	-0.809808	0.259734	Q91VW3	Sh3bgrl3	0.830817
AT1B1	918320	1117200	19.957	-0.282818	0.592739	P14094	Atp1b1	1.78891
AMY1	1.60511e+06	385643	19.9249	2.05733	0.0796349	P00687	Amy1	5.39036
ZA2G	0	1.98114e+06	19.9179	-20.9179	0.0323319	Q64726	Azgp1	0.261037
K2C1Ba	227823	1.73238e+06	19.9026	-2.92677	0.0509378	Q6IFZ6	Krt77	0.000658976
KRT36	599933	1.33837e+06	19.8864	-1.1576	0.17527	B1AQ75	Krt36	0
UPP1	1.35904e+06	574717	19.883	1.24167	0.165701	P52624	Upp1	0.0583737
S100A16	1386775	544316	19.881	1.34922	0.139436	D3Z2Y6	S100a16	0.828681
HORNb	789557	1124895	19.8685	-0.510675	0.418448	Q8VHD8	Hrnr	#N/A
Igkv5-39	270375	1.61722e+06	19.8481	-2.58047	0.0603402	A0A075B5M7	Igkv5-39	#N/A
MIF	1.02907e+06	858324	19.848	0.261742	0.586805	P34884	Mif	2.92975
AATM	875617	985158	19.8275	-0.170056	0.720299	P05202	Got2	0.276249
VATA	884929	953011	19.8097	-0.106931	0.77239	P50516	Atp6v1a	0.490996
SPB11	889782	942923	19.8055	-0.083689	0.778963	Q9CQV3	Serpinb11	0.101296
TALDO	1041600	779853	19.7967	0.417526	0.471519	Q93092	Taldo1	2.45864
GGH	490858	1.27991e+06	19.7559	-1.38266	0.141295	Q9Z0L8	Ggh	0.881278
ADSV	867200	889933	19.7448	-0.0373325	0.864266	Q60604	Scin	0.0091573
MYG	905972	850745	19.7445	0.0907404	0.781519	P04247	Mb	0.0325871
PSME1	993935	751164	19.7349	0.404023	0.524017	G3UXY0	Psme1	0.857024
PSA6	1299850	420661	19.7144	1.62761	0.110722	Q9QUM9	Psma6	0.536976
DNJB9	790446	921626	19.7073	-0.221514	0.6239	Q9QYI6	Dnajb9	0.417799
CALM4	835512	873961	19.7051	-0.0649086	0.853485	Q9JM83	Calm4	#N/A
PTMA	802949	905432	19.7042	-0.173298	0.721651	P26350	Ptma	7.88753
NPC2	1.18442e+06	497361	19.6816	1.25181	0.157751	Q9Z0J0	Npc2	0.31689
LMNB1	870495	779474	19.654	0.159335	0.72917	P14733	Lmnb1	0.093282
ACTR3	882725	767133	19.6539	0.202486	0.6581	A0A087WRA1	Actr3	0.381448
EFHD2	776259	865683	19.647	-0.157301	0.694589	Q8C845	Efhd2	0.174929
XIRP2	1.27379e+06	310708	19.5956	2.03549	0.0860581	Q4U4S6	Xirp2	#N/A
EIF5A_IF5A2	647890	918900	19.5794	-0.504158	0.42556	A0A0A0MQM0_Q8BGY2	Eif5a/Eif5a2	1.62453
NFL	713783	846017	19.5729	-0.2452	0.675585	P08551	Nefl	#N/A
GELS	738850	819450	19.5715	-0.149374	0.732133	P13020	Gsn	0.434277
MUP10	539967	1.00984e+06	19.5637	-0.903186	0.259851	A2BIN1	Mup10	#N/A
GLYG	412883	1.11641e+06	19.5444	-1.43506	0.149676	Q9R062	Gyg1	#N/A
RS3	432042	1.09613e+06	19.5434	-1.34318	0.165809	P62908	Rps3	7.04307
AHNAK2	931583	583325	19.5308	0.675384	0.33088	F7CVJ5	Ahnak2	0.0336316
ESP4	1.36491e+06	119850	19.5018	3.50949	0.0490373	A8R0T8	Esp4	1.78119
PKP1	888736	577967	19.4841	0.620767	0.392332	P97350	Pkp1	0.125781
TBA1B	918225	541800	19.4776	0.761086	0.291394	P05213	Tuba1b	0.305024
RAB11B_RB11A	1.07851e+06	373108	19.4692	1.53137	0.142	G3UY29_E9Q3P9	Rab11b/Rab11a	0.357484483379763/0.29599102175059
Gm5428_RL6	695112	743637	19.4564	-0.0973513	0.78956	E9PUX4_P47911	Rpl6	7.19867
GLNA	825788	608779	19.4522	0.439851	0.494747	P15105	Glul	0.837313
CAZA2	788825	645142	19.4516	0.290089	0.608216	P47754	Capza2	0.507932
REEP5	807558	625022	19.4502	0.369658	0.532979	G3X8R0	Reep5	1.517
RAC1	668401	738668	19.4243	-0.144213	0.767311	P63001	Rac1	0.607147
S10A8	1.39676e+06	0	19.4137	20.4137	0.0361743	P27005	S100a8	0.000295475
RPLP0	821892	555028	19.393	0.56639	0.377544	D3YVM5	Rplp0	8.73222
MAL2	537608	822733	19.3755	-0.613868	0.376224	Q8BI08	Mal2	0.079386
ES8L2	918942	425267	19.3583	1.1116	0.217602	Q99K30	Eps8l2	0.162037
S6A14	634142	699283	19.3467	-0.141072	0.775917	Q9JMA9	Slc6a14	0.037288
CPNS1	694316	584270	19.2861	0.248956	0.624498	D3YW48	Capns1	0.87183
HBBT1_HBB-BS	626325	638683	19.2707	-0.0281893	0.880382	A8DUK4_E9Q223	Hbb-bs	0.00761974
GSTP1	823374	440776	19.2697	0.901502	0.273485	P19157	Gstp1	0.0918667
BLMH	621001	635324	19.2608	-0.0328976	0.872813	Q8R016	Blmh	0.213599
RL8	716986	526279	19.2457	0.446116	0.509801	P62918	Rpl8	8.45698
TERA	598217	632958	19.2316	-0.0814423	0.815809	Q01853	Vcp	1.29066
K2C8	452225	745338	19.1917	-0.720853	0.335237	P11679	Krt8	3.46551
GUAD	757859	415336	19.162	0.86765	0.277328	Q9R111	Gda	0.169115
6PGD	534542	632175	19.154	-0.242021	0.654548	Q9DCD0	Pgd	0.330511
STXB1	583002	566499	19.1326	0.0414261	0.81371	O08599	Stxbp1	0.0573081
AMPN	894193	229964	19.1004	1.95917	0.109054	P97449	Anpep	0.431208
Igkv6-13	171738	899201	19.0304	-2.38843	0.086888	A0A075B5N7	Igkv6-13	#N/A
S10A9	1070775	0	19.0302	20.0302	0.0416432	P31725	S100a9	#N/A
CBR2	813992	222850	18.9838	1.86894	0.118373	P08074	Cbr2	2.78614
IF4A1	698458	329050	18.9707	1.08586	0.235029	P60843	Eif4a1	1.1966
DSG1A	739150	274267	18.9508	1.43028	0.165129	Q61495	Dsg1a	#N/A
CAST	559214	442542	18.9341	0.337584	0.593817	Q8CE80	Cast	0.597847
CATB	530264	416758	18.853	0.347502	0.562531	P10605	Ctsb	0.76027
1433T	176496	736108	18.7996	-2.06028	0.117469	P68254	Ywhaq	1.26877
CF132	504938	355453	18.7146	0.506443	0.483876	Q91Z58	C6orf132	#N/A
GANAB	724067	107958	18.6663	2.74564	0.0845228	Q8BHN3	Ganab	0.24892
FLG2	469545	322180	18.5946	0.543395	0.438988	E9QPZ3	Flg2	#N/A
ZFP185	483262	284641	18.5506	0.76366	0.378506	A2BI37	Zfp185	0.189306
CLD11	361825	389980	18.52	-0.108108	0.797577	Q60771	Cldn11	0.000457959
RNPEP	320250	419917	18.4975	-0.390903	0.567245	E9PYF1	Rnpep	0.283142
K1H1	688127	47904.2	18.4894	3.84442	0.0664813	Q9UE12	KRT31	#N/A
FRIH	430896	304350	18.4879	0.501606	0.46151	P09528	Fth1	13.4117
GLOD4	305906	424600	18.4785	-0.473015	0.514971	F6ZTG3	Glod4	0.238402
RPS28	187840	538220	18.4697	-1.51869	0.197693	G3UYV7	Rps28	5.34297
CEACAM1	485667	236125	18.4612	1.04041	0.26795	Q3LFS9	Ceacam1	0.12488
DPYL2	312092	404558	18.4509	-0.374377	0.581029	O08553	Dpysl2	0.0352331
RS8	348383	366774	18.4479	-0.0742162	0.834996	P62242	Rps8	14.2198
ATOX1	532808	176733	18.4365	1.59204	0.177751	O08997	Atox1	1.10155
PTGES3	498988	209738	18.4349	1.25042	0.250133	D3Z7C6	Ptges3	0.703817
TCTP	446917	259800	18.4308	0.782602	0.369535	P63028	Tpt1	19.1553
ENPP3	417561	287017	18.4264	0.54085	0.557668	Q6DYE8	Enpp3	0.171333
ESP34	241950	462075	18.4253	-0.933415	0.314548	A8R0W6	Esp34	0.0448654
CNDP2	365163	323689	18.3938	0.173932	0.826423	Q9D1A2	Cndp2	0.139862
K1C16b	361124	320922	18.3795	0.17027	0.782398	Q9Z2K1	Krt16	0.00189654
ES8L1	402098	237821	18.2875	0.757671	0.392257	Q8R5F8	Eps8l1	0.06941
K2C71	263200	376458	18.2869	-0.516329	0.508158	Q3SY84	KRT71	#N/A
PRSS8	181022	441864	18.2486	-1.28744	0.230548	Q99L44	Prss8	0.211709
ISG15	618125	0	18.2375	19.2375	0.0588133	Q64339	Isg15	0.278651
METK2	458394	106660	18.108	2.10356	0.153693	Q3THS6	Mat2a	0.477395
OXR1	205629	339050	18.055	-0.72145	0.413369	E9Q0A7	Oxr1	0.65509
AT1A1	267221	253712	17.9907	0.0748376	0.897602	Q8VDN2	Atp1a1	3.36193
PPBT	262935	236831	17.9309	0.150849	0.767809	P09242	Alpl	0.0454498
ANXA4	228573	267350	17.9198	-0.226072	0.666979	F7ANV6	Anxa4	0.166045
TBB4A	267699	208386	17.8609	0.361354	0.507809	Q9D6F9	Tubb4a	0
SPG17	0	473111	17.8518	-18.8518	0.0736017	Q5S003	Spag17	0.0332234
TAGL2	370122	99674.2	17.8417	1.8927	0.195751	Q9WVA4	Tagln2	0.682287
CYB5A	241108	226717	17.8356	0.0887907	0.823676	G5E850	Cyb5a	2.64212
HOP	348775	112150	17.8142	1.63686	0.212166	Q8R1H0	Hopx	0.051397
Ighv6-3	45733.3	406184	17.7857	-3.15079	0.110689	A0A075B5T2	Ighv6-3	#N/A
TPM4	114492	312433	17.7036	-1.4483	0.259212	Q6IRU2	Tpm4	0.577012
PDC6	275863	146717	17.6889	0.910916	0.395942	Q9WU78	Pdcd6ip	0.414778
ESP3	0	421650	17.6857	-18.6857	0.0792033	|J3QN49	Esp3	0.22399
GNAO	207500	214100	17.6855	-0.0451732	0.874058	P18872	Gnao1	0.0318809
CCT4	324480	93118.3	17.6718	1.80098	0.211876	G5E839	Cct4	0.419284
YBX1	203751	195872	17.6083	0.0568908	0.886008	A2BGG7	Ybx1	1.48238
CAN2	195376	190937	17.5594	0.0331577	0.785411	O08529	Capn2	0.178916
MPCP_ MCG10343	231128	144442	17.5187	0.678198	0.513195	Q8VEM8_G5E902	Slc25a3	1.6677
ARGI1	282017	75780.8	17.4488	1.89586	0.208216	Q61176	Arg1	0.0269966
B4GT1	49004.2	298092	17.405	-2.60476	0.149751	P15535	B4galt1	0.170012
EEF1D	279289	66868.3	17.4011	2.06235	0.194589	D3YUQ9	Eef1d	1.70465
COX5A	113975	223800	17.3657	-0.973486	0.386846	P12787	Cox5a	1.26715
ENO2	81790.8	234508	17.2709	-1.51961	0.286581	D3Z6E4	Eno2	0.00106873
EPIPL	245833	65539.2	17.2483	1.90724	0.211062	Q8R0W0	Eppk1	0.29924
CYB5B	81566.7	224817	17.225	-1.46269	0.303212	Q9CQX2	Cyb5b	0.20809
CB054	141892	163493	17.2203	-0.204432	0.84571	Q8CEZ4	Mab21l4	0.000295894
CCT8	129135	168240	17.1819	-0.381638	0.648091	H3BL49	Cct8	0.422899
IDHC	118933	157451	17.0763	-0.404745	0.566564	O88844	Idh1	0.0993543
KCRU	155292	120550	17.0735	0.365346	0.663859	P30275	Ckmt1	0.35764
PARK7	120549	152161	17.057	-0.335973	0.683386	A2A815	Park7	1.53462
CHM4B	45953.3	212275	16.9783	-2.20767	0.238481	Q9D8B3	Chmp4b	0.483061
K1C23	251221	0	16.9386	17.9386	0.126066	Q9C075	KRT23	0.265193
ANXA7	60870	187687	16.9232	-1.62451	0.28366	Q07076	Anxa7	0.477548
KCC2A	0	247522	16.9172	-17.9172	0.143162	P11798	Camk2a	0.000399623
SPTBN2	59411.7	171618	16.8177	-1.53036	0.318116	Q68FG2	Sptbn2	0.0511873
RTN4	87730	133274	16.7537	-0.603249	0.652017	Q8BH78	Rtn4	0.672591
VAT1	209742	0	16.6783	17.6783	0.149477	Q62465	Vat1	0.158845
SNAA	69886.7	125054	16.5727	-0.839455	0.572954	Q9DB05	Napa	0.491433
VATG1	42075.8	150828	16.5575	-1.84181	0.317759	Q9CR51	Atp6v1g1	1.05544
ARPC3	132964	45758.3	16.4474	1.53891	0.378465	D3Z2F7	Arpc3	0.890625
ACSL1	48806.7	123462	16.3943	-1.3389	0.395278	D3Z041	Acsl1	0.404365
TCPB	68929.2	88350	16.263	-0.358111	0.731369	P80314	Cct2	0.49809
CTTN	54625.8	98475.8	16.2241	-0.850175	0.524324	Q921L6	Cttn	0.254587
CATZ	82209.2	63470	16.1524	0.373219	0.706797	Q9WUU7	Ctsz	0.350825
D3Z7K0	47251.7	94866.7	16.1167	-1.00552	0.510838	D3Z7K0	Otub1	0.181483
Igkv8-19	68447.5	69904.2	16.078	-0.0303802	0.9001	A0A087WNJ3	Igkv8-30	#N/A
ACADM	63404.2	72685	16.0542	-0.197077	0.816647	P45952	Acadm	0.436586
ETFB	47771.7	81453.3	15.9795	-0.769806	0.597502	Q9DCW4	Etfb	0.774868
FPPS	82417.5	44416.7	15.9526	0.891835	0.550382	Q920E5	Fdps	0.294305
CHIA	126379	0	15.9474	16.9474	0.246058	Q91XA9	Chia	#N/A
ENPL	78350	47790	15.9447	0.713213	0.606871	P08113	Hsp90b1	2.02883
LGALS7	66028.3	58275.8	15.9235	0.180185	0.816788	Q9CRB1	Lgals7	0.271708
ACADL	117215	0	15.8388	16.8388	0.292548	P51174	Acadl	0.458508
RPL15	31119.2	77369.2	15.7272	-1.31393	0.637701	B8JKK2	Rpl15	6.73013
NHRF1	29844.2	74550.8	15.6717	-1.32075	0.57127	P70441	Slc9a3r1	0.26229
PSME2	45094.2	27242.5	15.1424	0.727061	0.682564	E0CZ90	Psme2	0.464789
ACLY	24055.8	20354.2	14.4386	0.241052	0.846407	Q91V92	Acly	0.192079

## Sheet: 23 abundant tear components
	Tear proteome (Signal intensities by LC-MS/MS)					scRNAseq data
						Average mRNA expression																									Comparison females vs males
							Males+Females	Males											Females										Males	Females		Acinar compartment (#0,1,6,7)					4. Ltf+ epithelial					10. Car6hi acinar
Protein symbol	Females (n=6)	Males (n=6)	Log2 mean	Fold diff	p value	Gene name	LG epithelium	0	1	2	3	4	5	6	7	8	9	10	0	1	2	3	4	5	6	7	8	9	Acinar compartment (#0,1,6,7)	Acinar compartment (#0,1,6,7)	Gene name	p_val	avg_log2FC	pct.1	pct.2	p_val_adj	p_val	avg_log2FC	pct.1	pct.2	p_val_adj	p_val	avg_log2FC	pct.1	pct.2	p_val_adj
ACTB	2.69543e+08	257205000	27.9725	0.0675985	0.650797	Actb	15.6341	0.225197	0.716011	54.0578	36.4133	13.0341	14.8143	0.508028	0.894071	3.53821	0.647228	2.86448	0.122645	0.321433	63.2311	53.8199	12.3936	27.1404	0.154649	0.228541	8.85325	0.811353	0.499825	0.206167	Actb	2.87556e-44	-0.314364	0.582	0.677	5.11073e-40	0.164139	-0.0673915	0.943	0.8	1	0.836674	-1.09321	0.625	0.393	1
APOE	505417	1.93738e+07	23.2448	-5.26049	0.0102739	Apoe	20.8039	1.64608e-16	8.37264e-15	125.889	38.942	0.0547868	26.2673	1.64039e-15	1.75844e-15	1.71267e-16	9.74113e-17	0.00334803	2.85685e-17	8.91027e-17	137.734	26.6144	3.44833	19.2859	4.64269e-17	9.46821e-17	5.21322	7.70535e-11	3.39559e-15	6.41131e-17	Apoe	2.95108e-56	-4.80514e-15	0.307	0.079	5.24495e-52	7.99417e-33	2.07631	0.467	0.07	1.4208e-28	0.00347877	-0.00482212	0.167	0.036	1
CAH6	2.28755e+08	4.07308e+08	28.2446	-0.83232	0.0422988	Car6	17.0358	0.0903259	0.230244	4.75689	5.29262	26.0373	7.36227	0.219296	0.476873	5.4144	1.51714	524.65	1.25976	1.07765	3.19855	3.23542	36.3059	3.05977	2.0656	2.13004	3.31773	464.597	0.19335	1.65005	Car6	7.87826e-180	1.151	0.815	0.5	1.4002e-175	0.560027	0.46445	0.795	0.588	1	0.0380194	-0.17502	1	1	1
ESP15	3.66692e+06	7.27917e+06	22.3839	-0.989206	0.129062	Esp15	44.3398	50.9589	86.8171	25.612	30.3945	7.24588	29.9909	60.289	70.0558	84.7846	71.2496	4.13055	55.7802	63.6675	11.7266	10.7561	5.34548	9.76938	76.3536	64.0856	35.953	0.953875	66.5873	65.7241	Esp15	0.0770751	-0.0185447	0.998	1	1	1.97131e-12	-0.377943	0.984	0.994	3.50362e-08	1.5649e-24	-1.39278	1	0.964	2.78129e-20
ESP16	2.56087e+06	4.78567e+06	21.8086	-0.902088	0.162365	Esp16	20.3791	33.5943	51.7347	14.0865	16.9928	4.00649	15.9875	38.9818	45.5265	42.0617	44.7321	2.24148	0.462553	0.362941	0.148126	0.109569	0.094627	0.072085	0.410786	0.596889	0.0594747	0.00249486	41.8056	0.452863	Esp16	0	-4.88083	0.138	1	0	4.66113e-60	-2.19336	0.066	0.952	8.28422e-56	9.60813e-30	-1.69306	0.069	0.964	1.70765e-25
ESP18	1.28314e+07	4.12186e+07	24.6878	-1.68362	0.0332199	Esp18	25.0441	17.5668	23.8429	9.16619	23.1753	45.8233	25.6554	19.537	20.9932	19.1561	23.3389	42.2796	35.0301	36.1709	6.67717	25.8719	35.3862	28.0282	39.1507	36.5644	32.189	14.0948	20.3664	36.882	Esp18	2.80275e-236	0.826167	0.992	0.997	4.98133e-232	0.000142603	-0.363838	0.992	0.979	1	1.2145e-13	-1.51964	0.972	0.973	2.15853e-09
ESP6	217777500	3.34739e+08	28.0414	-0.620182	0.0734523	Esp6	81.8636	103.753	121.114	42.8705	52.5368	95.6878	52.0305	107.17	104.454	109.049	118.489	68.1586	97.2605	114.119	18.7568	19.4523	62.2299	19.7144	111.71	107.584	61.5037	31.9323	110.412	108.112	Esp6	0.0102946	-0.0300912	1	1	1	1.90136e-14	-0.612726	1	1	3.37928e-10	1.60036e-09	-1.0704	1	1	2.84432e-05
LACREIN	2.25232e+09	2.08933e+09	31.0156	0.10837	0.410705	Gm1553	764.201	880.058	1527.42	608.284	707.419	200.328	711.906	1189.56	1499.8	1141.15	1744.86	121.103	598.65	778.704	127.696	120.885	68.2746	121.626	725.576	816.004	449.278	18.1779	1209.34	730.867	Gm1553	1.5689e-224	-0.725763	1	1	2.7884e-220	9.91268e-65	-1.53915	1	1	1.76178e-60	2.82949e-30	-2.67058	1	1	5.02886e-26
LCN11	1.02697e+09	6.82543e+08	29.6709	0.5894	0.0539668	Lcn11	18.81	29.6731	31.3607	11.0639	11.9589	7.92885	12.1328	26.7331	26.0471	23.6275	30.6749	8.40042	17.9753	26.1594	2.44935	2.87745	9.94615	2.56406	19.132	19.9301	10.5767	74.7604	29.4535	20.8184	Lcn11	1.12721e-71	-0.481058	0.945	0.999	2.00339e-67	1.83695e-08	0.293877	0.795	0.916	0.000326482	0.55604	3.01065	0.903	0.911	1
MUP4	5342525	4.38729e+08	27.7262	-6.35966	8.3e-06	Mup4	83.5028	106.604	136.898	41.2106	49.4465	114.484	48.2395	119.302	116.849	96.7038	122.14	1015.11	1.95489	2.29013	1.02116	0.888876	6.19862	0.70232	2.33703	3.28125	1.70174	191.905	120.127	2.45411	Mup4	0	-5.13206	0.732	1	0	4.54118e-63	-4.00383	0.59	0.998	8.07104e-59	4.46281e-25	-2.39709	0.819	1	7.93174e-21
OBP5	3.35148e+09	1.91992e+09	31.2955	0.803752	0.0222822	Obp1a	835.279	952.62	1121.77	323.055	384.247	669.192	393.298	1160.03	981.826	717.561	1104.32	2787.04	1378.94	1538.69	205.738	198.502	596.084	193.152	1419.29	1465.93	773.162	1744.81	1048.92	1450.81	Obp1a	1.06991e-276	0.46757	1	1	1.90155e-272	6.99259e-20	-0.166641	1	1	1.24279e-15	0.0154925	-0.675355	1	1	1
OBP7	3.82871e+09	1678247500	31.3586	1.1899	0.00688797	Obp1b	104.679	0.420321	0.426286	0.350253	0.439458	0.916723	0.262414	0.382533	1.66522	0.978726	1.36082	1.13886	585.578	686.145	101.978	96.3022	70.4809	96.6688	627.695	658.665	360.964	46.0557	0.521072	639.927	Obp1b	0	8.71893	1	0.157	0	1.74527e-124	5.22084	1	0.076	3.10187e-120	2.63309e-34	4.45946	1	0.08	4.6798e-30
PIP	8.96349e+08	458410250	29.3354	0.967422	0.0262407	Pip	126.432	184.568	203.849	63.0452	69.2826	77.1088	65.705	201.879	176.674	129.318	168.691	83.0324	170.145	189.743	21.8247	21.8171	63.8635	21.7158	178.145	168.072	84.0055	300.603	193.524	176.957	Pip	1.51185e-12	-0.128414	1	1	2.687e-08	8.29935e-15	-0.268078	0.992	1	1.47504e-10	1.03169e-23	1.84363	1	1	1.83363e-19
SCGB1B2	2.25214e+09	2.07625e+09	31.0112	0.117317	0.384108	Scgb1b2	521.054	891.632	861.605	240.746	304.779	70.9594	299.086	922.516	862.012	507.196	871.022	39.29	770.28	726.542	103.678	105.979	60.1081	105.611	732.428	734.725	407.107	19.1837	883.958	740.021	Scgb1b2	1.60005e-109	-0.256096	1	1	2.84377e-105	0.000632856	-0.235818	1	1	1	4.14858e-21	-0.997234	1	1	7.37327e-17
SCGB1B20_SCGB1B29	145001450	4.21775e+08	28.0782	-1.54041	0.0151535	Scgb1b20	206.871	433.577	412.691	120.9	145.598	36.5148	142.755	416.353	471.203	248.6	390.606	20.9835	80.7275	77.034	12.4242	12.1362	6.67469	12.1315	86.9026	82.4179	42.8231	1.49339	426.59	82.0064	Scgb1b20	0	-2.36493	0.998	1	0	9.7801e-68	-2.28928	1	1	1.73822e-63	2.82949e-30	-3.14024	1	1	5.02886e-26
						Scgb1b29	0.0357664	0.0722001	0.0524016	0.0614606	0.00941578	0.0027903	1.60076e-16	0.0470538	0.0519888	0.170972	0.0727226	0	0.00162009	0.00675513	0	0	0	0.00467761	0.00130415	0	0	0.0296436	0.0593634	0.002448	Scgb1b29	2.87556e-44	-0.314364	0.582	0.677	5.11073e-40	0.446216	-0.00401995	0	0.005	1	0.216428	0.0421451	0.014	0	1
SCGB1B3	6.59982e+07	6.35908e+08	28.3867	-3.26832	0.000240664	Scgb1b3	55.0277	103.022	111.277	51.4568	65.6356	13.7063	62.0485	97.9966	113.659	134.563	96.9387	10.0663	0.0291598	0.0891458	5.04625e-10	0.00709871	0.00456159	0.0144102	0.0596922	0.0967148	0.0810468	0.00570915	0.0593634	0.002448	Scgb1b3	4.4828e-13	-0.0796702	0.024	0.094	7.96727e-09	7.9932e-69	-3.8718	0.008	1	1.42063e-64	6.10538e-32	-3.45989	0.028	1	1.08511e-27
SCGB2B2	1.09336e+09	9.38376e+08	29.9201	0.220532	0.236448	Scgb2b2	613.271	1192.92	1014.22	260.656	319.501	76.7116	305.257	1153.57	1110.34	533.245	961.346	42.4484	821.2	765.55	113.237	109.915	68.7396	108.715	757.946	755.239	414.883	24.3349	105.93	0.0686341	Scgb2b2	0	-6.64475	0.096	1	0	0.00569972	-0.156151	1	1	1	2.28459e-14	-0.778176	1	1	4.06041e-10
SCGB2B24	1.11133e+08	1.28533e+08	26.8364	-0.20985	0.384755	Scgb2b24	397.486	707.483	733.839	205.993	244.375	53.369	231.422	679.956	811.272	437.522	658.764	31.2672	434.355	440.936	66.1908	64.4	33.2217	62.2279	439.591	450.363	236.398	8.19734	341.165	57.5652	Scgb2b20	0	-2.54658	0.996	1	0	2.72479e-67	-2.28085	0.984	1	4.84276e-63	2.82949e-30	-2.96843	0.986	1	5.02886e-26
SCGB2B7_SCGB2B20	6.18585e+07	4.86733e+08	28.0312	-2.97609	0.000987552	Scgb2b7	293.108	255.288	295.834	83.5982	98.4324	23.9596	92.6307	257.526	349.442	159.194	245.875	13.9006	35.826	40.0821	6.38158	5.30724	3.323	5.3918	42.2658	41.9848	22.0504	0.81084	720.714	441.201	Scgb2b24	0	-0.706725	1	1	0	8.55022e-12	-0.667873	1	1	1.51963e-07	2.38156e-28	-1.81078	1	1	4.23274e-24
SCGB2B20	3.82143e+07	0	24.1876	25.1876	0.00386722	Scgb2b20	160.564	346.601	337.318	90.9451	109.615	24.3459	105.259	304.869	404.193	173.59	286.677	14.5583	57.8077	54.4643	8.48289	8.40618	4.21557	7.85573	58.028	60.145	26.9628	0.987811	277.675	40.1987	Scgb2b7	0	-2.75791	0.982	1	0	2.73088e-68	-2.52949	0.951	1	4.8536e-64	2.82878e-30	-3.04063	0.958	1	5.02758e-26
SVAL2	1285305000	831577500	29.9793	0.628188	0.0450373	Sval2	20.5713	22.4766	30.6402	7.50437	10.2942	8.01808	9.51008	25.3119	31.7191	22.6669	24.0934	23.4576	38.7135	49.1282	5.60335	5.1489	9.78529	4.96941	45.3788	43.4899	21.1051	39.0813	26.5685	44.3852	Sval2	1.44648e-186	0.719203	0.993	0.995	2.57083e-182	0.0199475	0.258173	0.918	0.865	1	0.123208	0.712646	0.986	1	1
TCTP	446917	259800	18.4308	0.782602	0.369535	Tpt1	19.1553	3.13977	7.52249	26.0653	36.5267	32.4744	44.5697	4.97145	5.64645	11.0294	8.00763	14.5075	3.45604	6.80364	26.9173	45.2002	38.6122	51.6426	3.47453	6.86489	11.7204	8.41541	5.18177	5.07944	Tpt1	0.0386371	-0.0240805	0.891	0.93	1	0.00102005	0.242885	1	0.962	1	0.000146055	-0.719873	0.958	0.875	1
TRFL	9.91417e+07	266195000	27.4447	-1.42492	0.0215519	Ltf	16.3618	0.000287113	0.00564665	0.771696	3.9879e-17	170.451	5.90311e-17	0.00229307	0.00469342	0.12616	0.000283426	0.466924	3.29714e-17	2.74269e-16	5.40183e-17	4.83166e-15	119.691	4.38454e-15	1.0681e-16	4.43742e-17	5.20894e-16	0.133215	0.00285774	1.17985e-16	Ltf	1.00759e-05	-0.00411697	0.061	0.103	0.179079	1.00611e-07	-0.506483	0.533	0.903	0.00178816	0.671152	-0.372373	0.083	0.062	1
FC > 1.5 in females																																FC > 1.5 in females
FC > 1.5 in males																																FC > 1.5 in males
p-val < 0.05																																p-adj < 0.05
